# Supplementary material for: Upregulation of CRABP2 by TET1-mediated DNA hydroxymethylation attenuates mitochondrial apoptosis and promotes oxaliplatin resistance in gastric cancer
Source: PubMed Central journal article supplement (PMC9532395; doi:10.1038/s41419-022-05299-2), 2022-10-04

F1 e

CRABP2

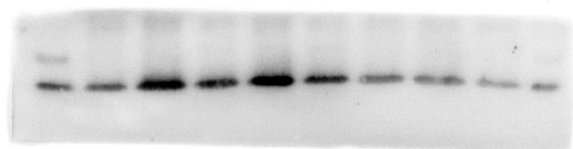

GAPDH

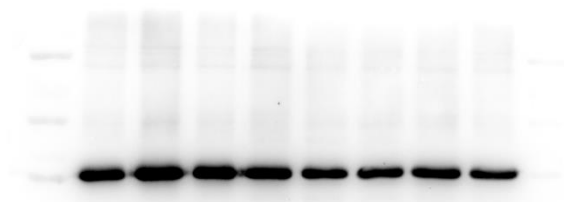

F1 K

CRABP2

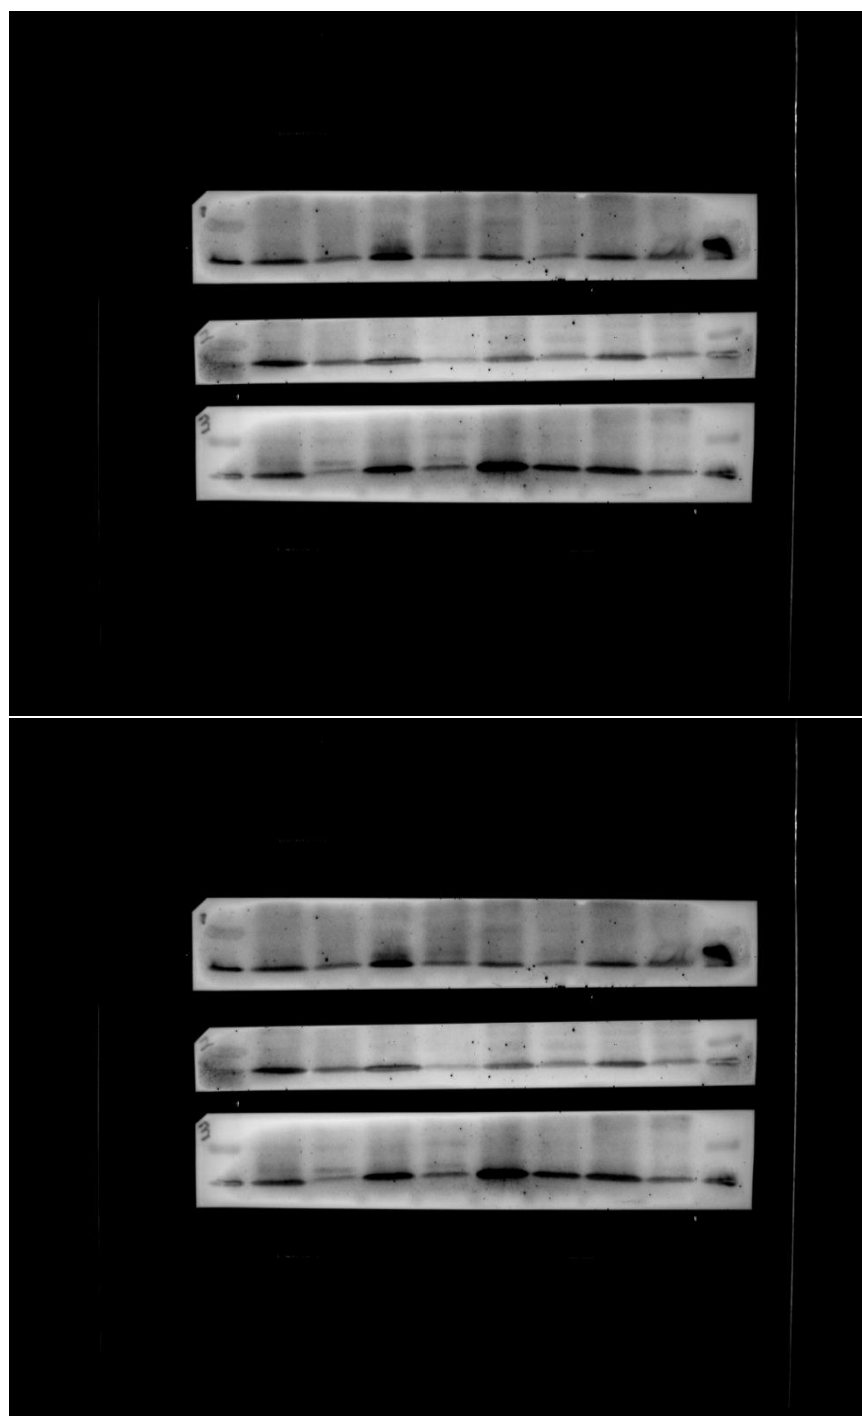

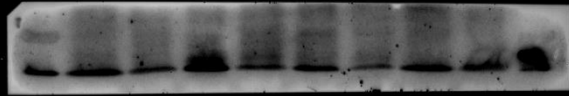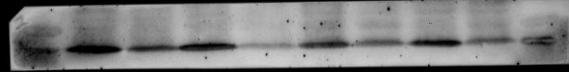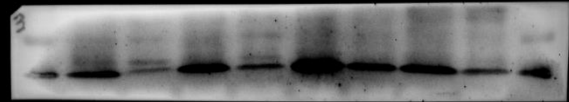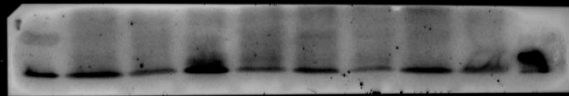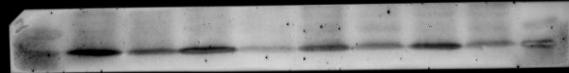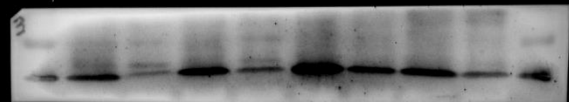

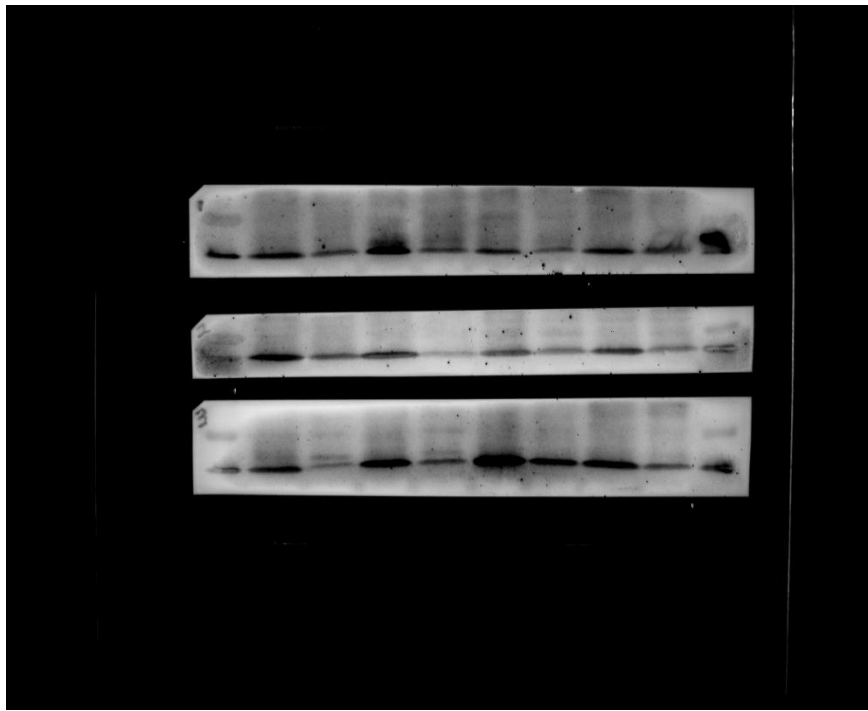

**GAPDH**

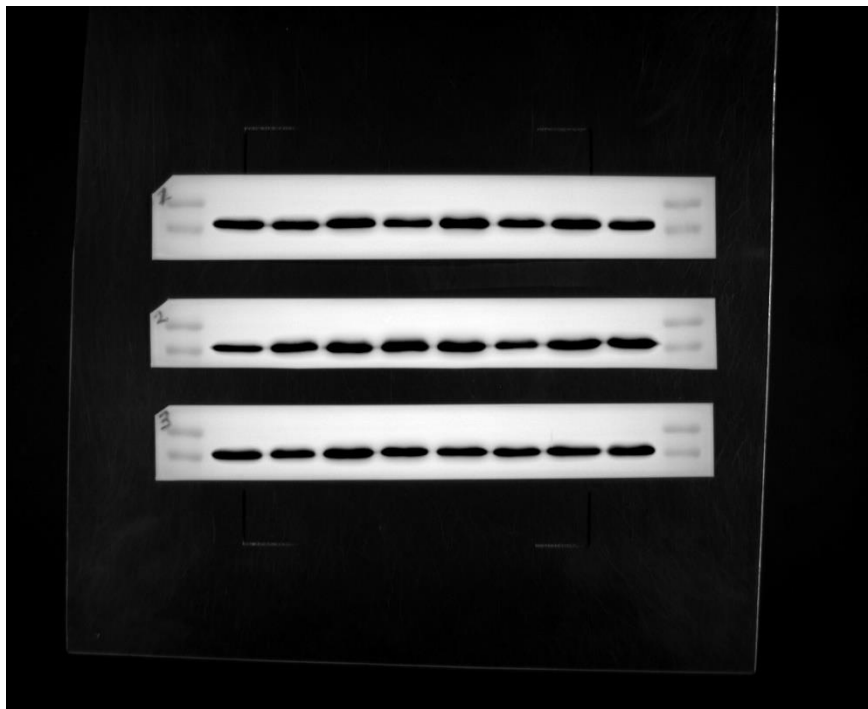

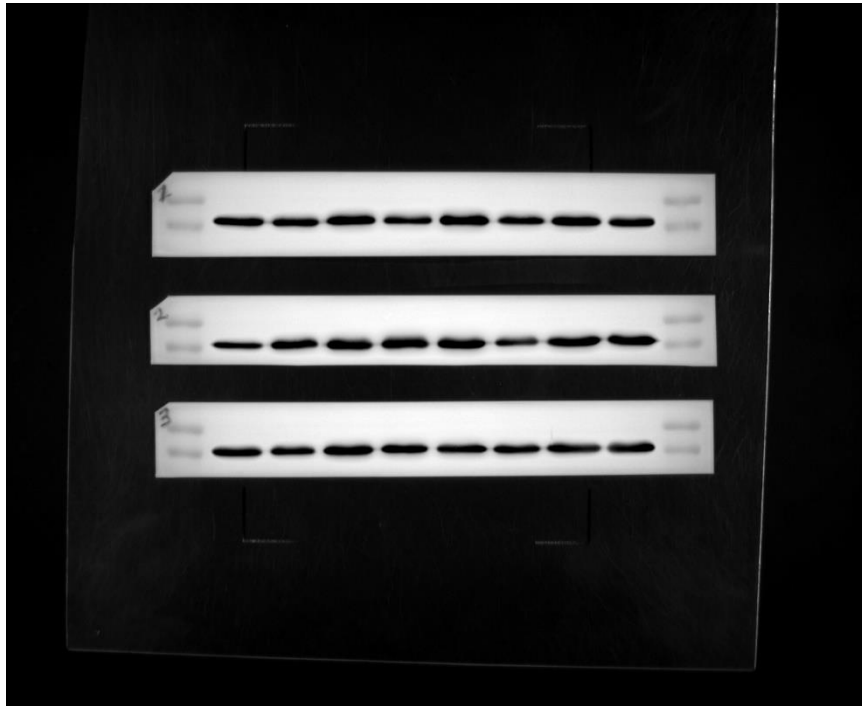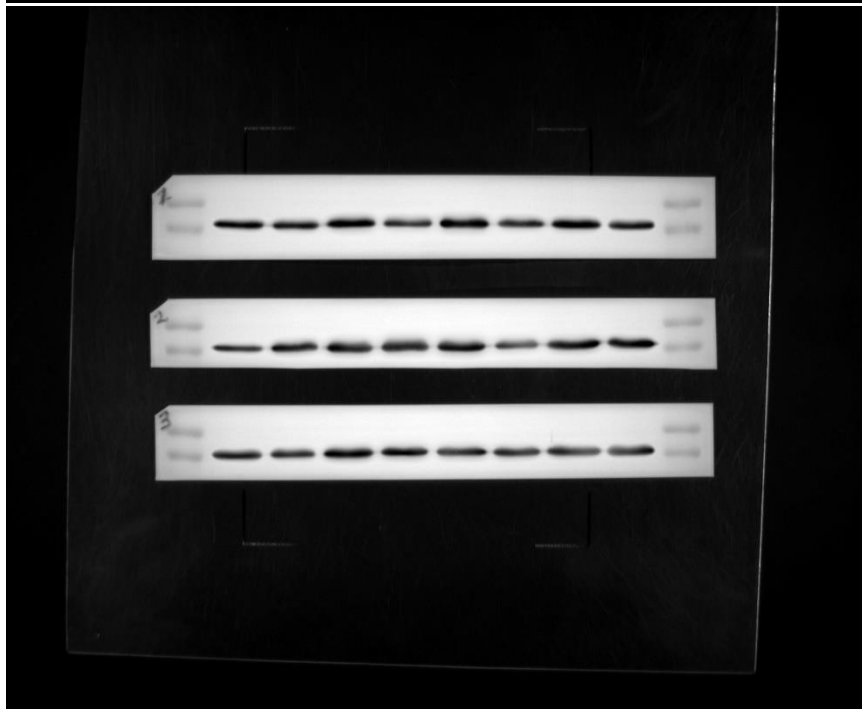

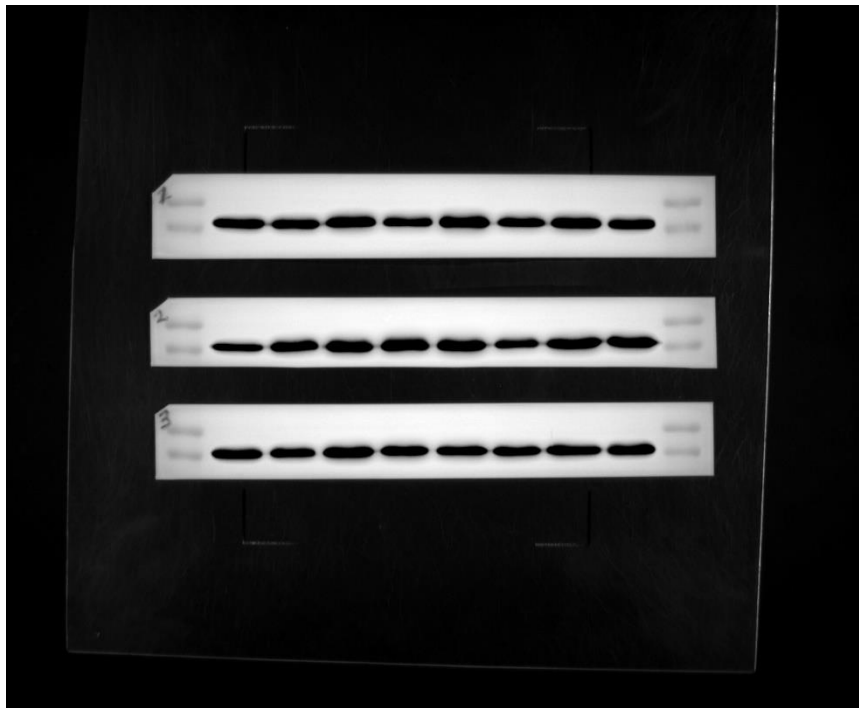

F3 B

BAX

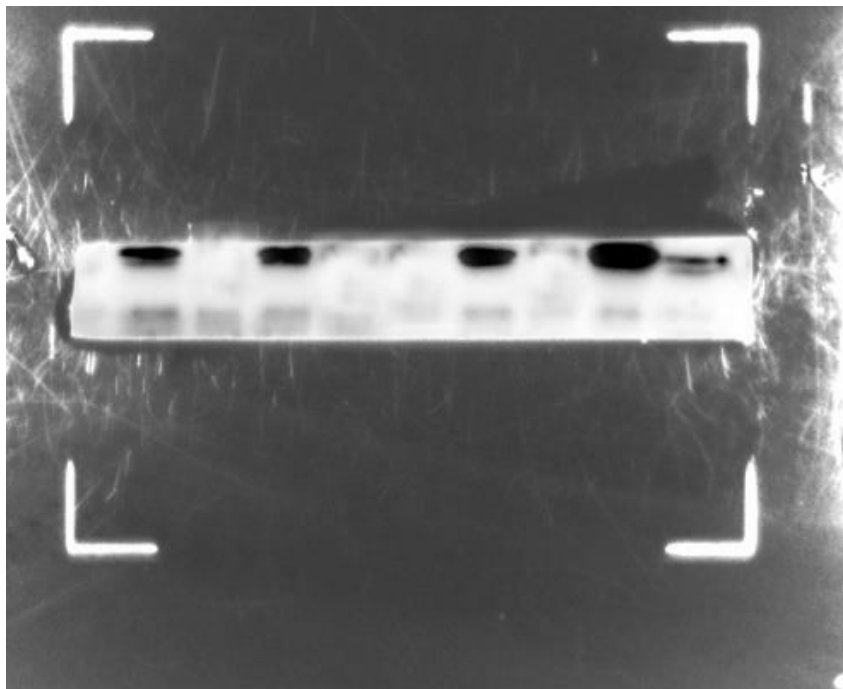

## PARKIN

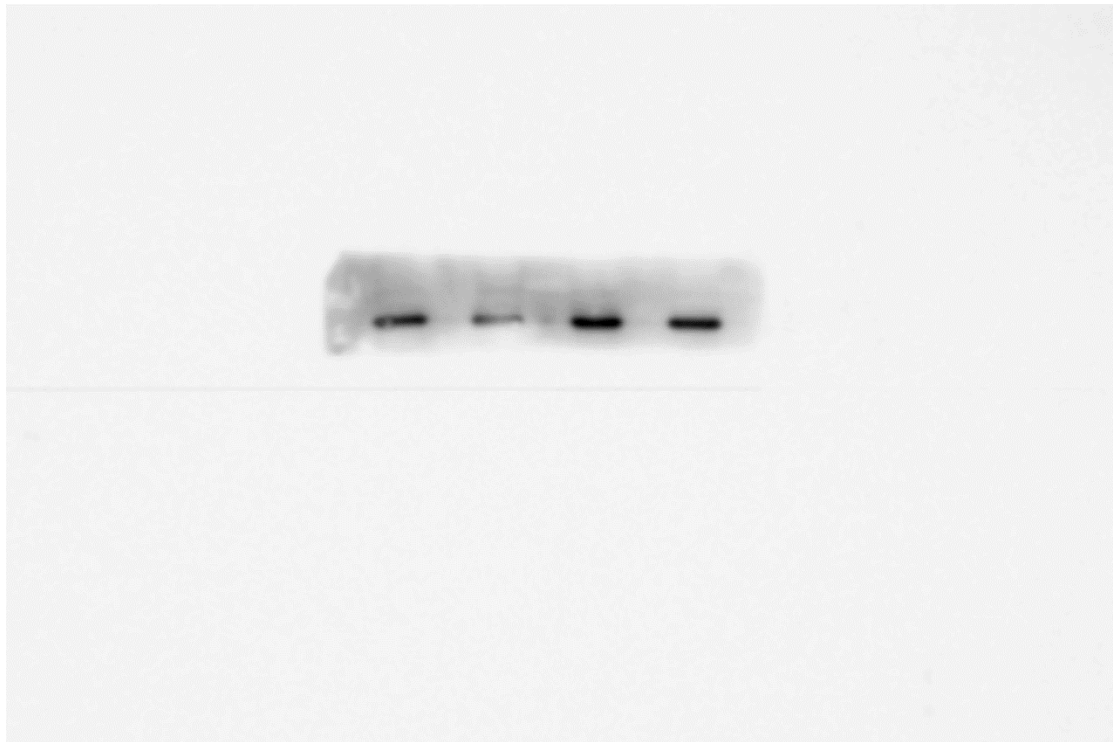

## CRABP2

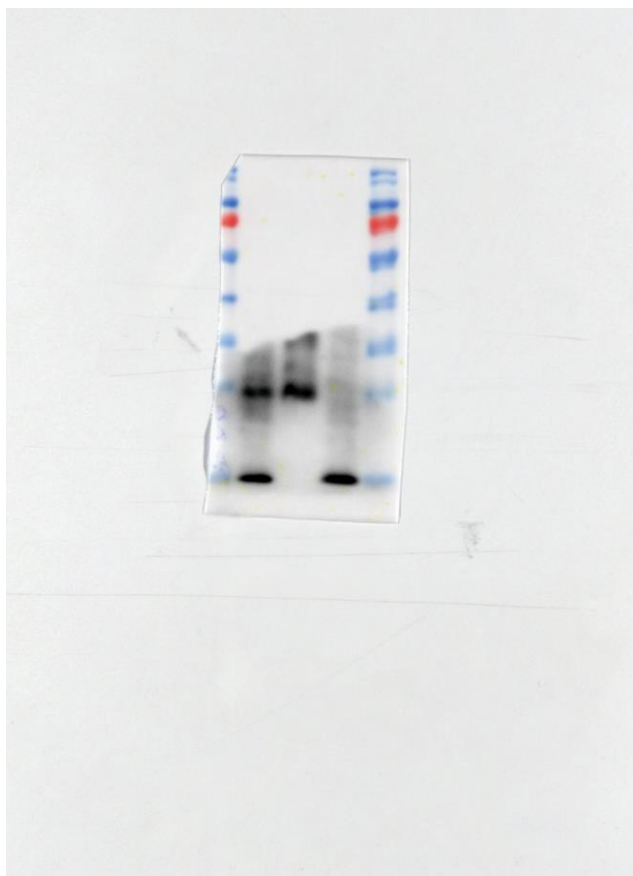

F3 C

GST

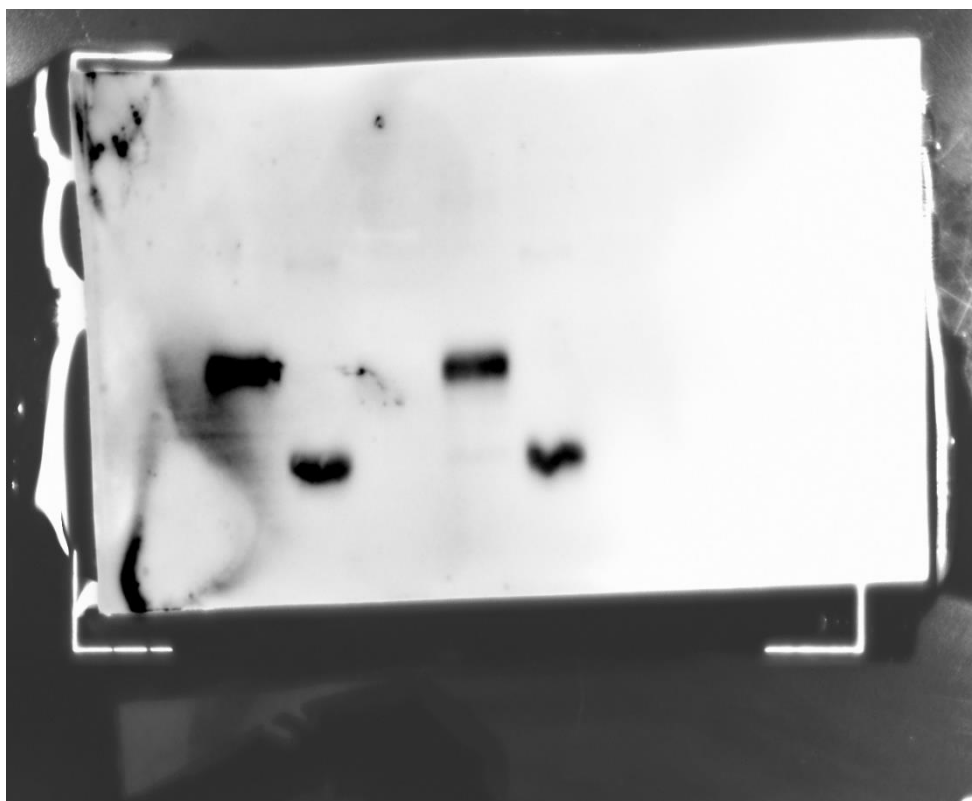

FLAG

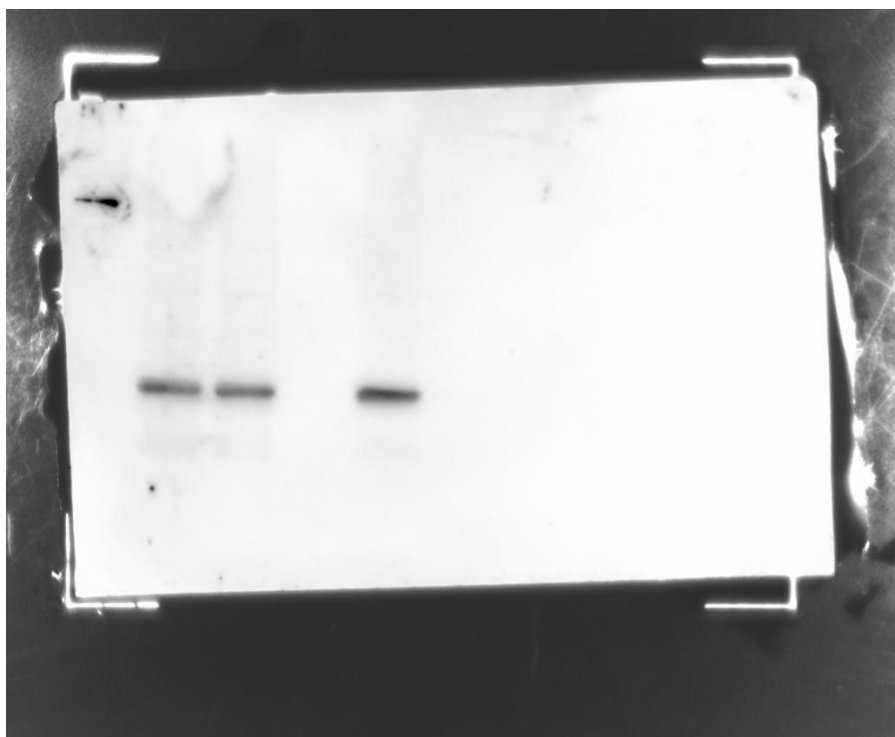



**F3 D**

**Up BAX**

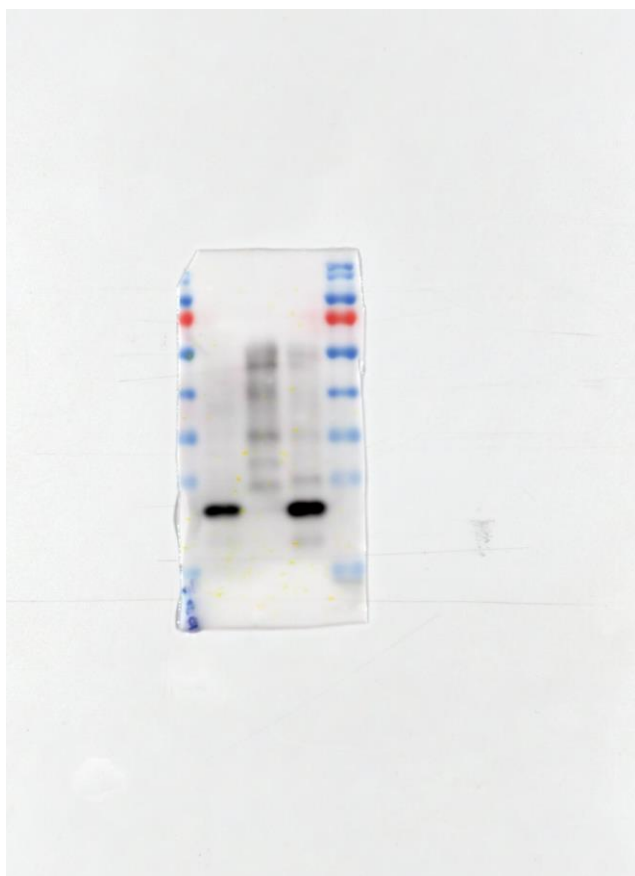

**CRABP2**

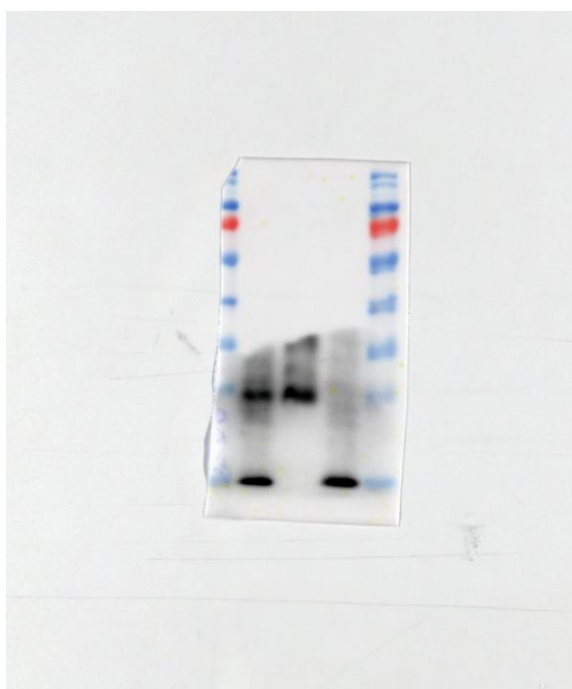

Under  
CRABP2

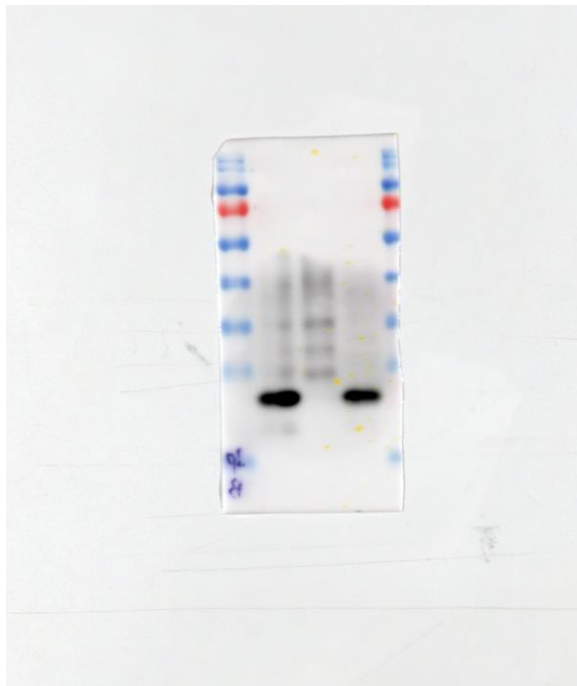

PARKIN

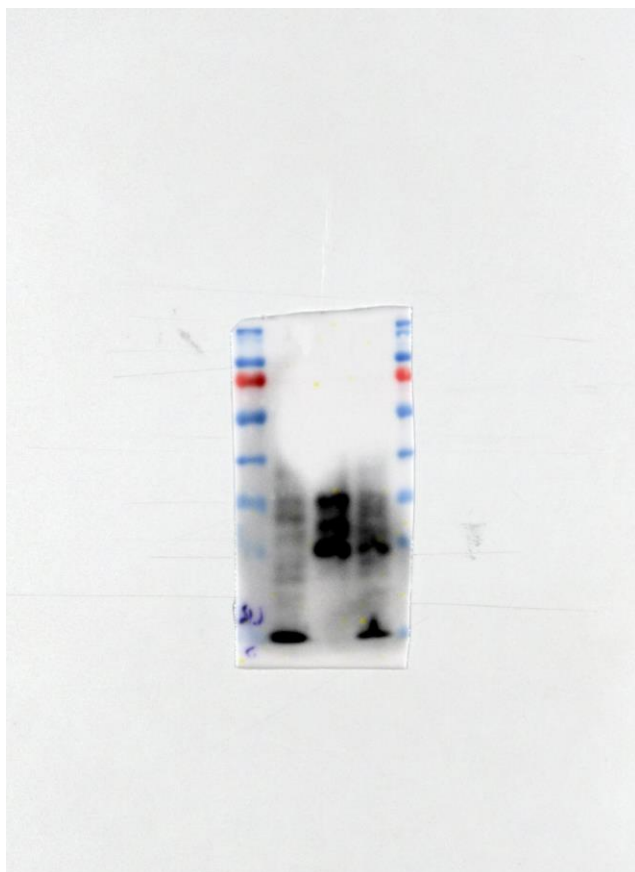

F3 E  
BAX

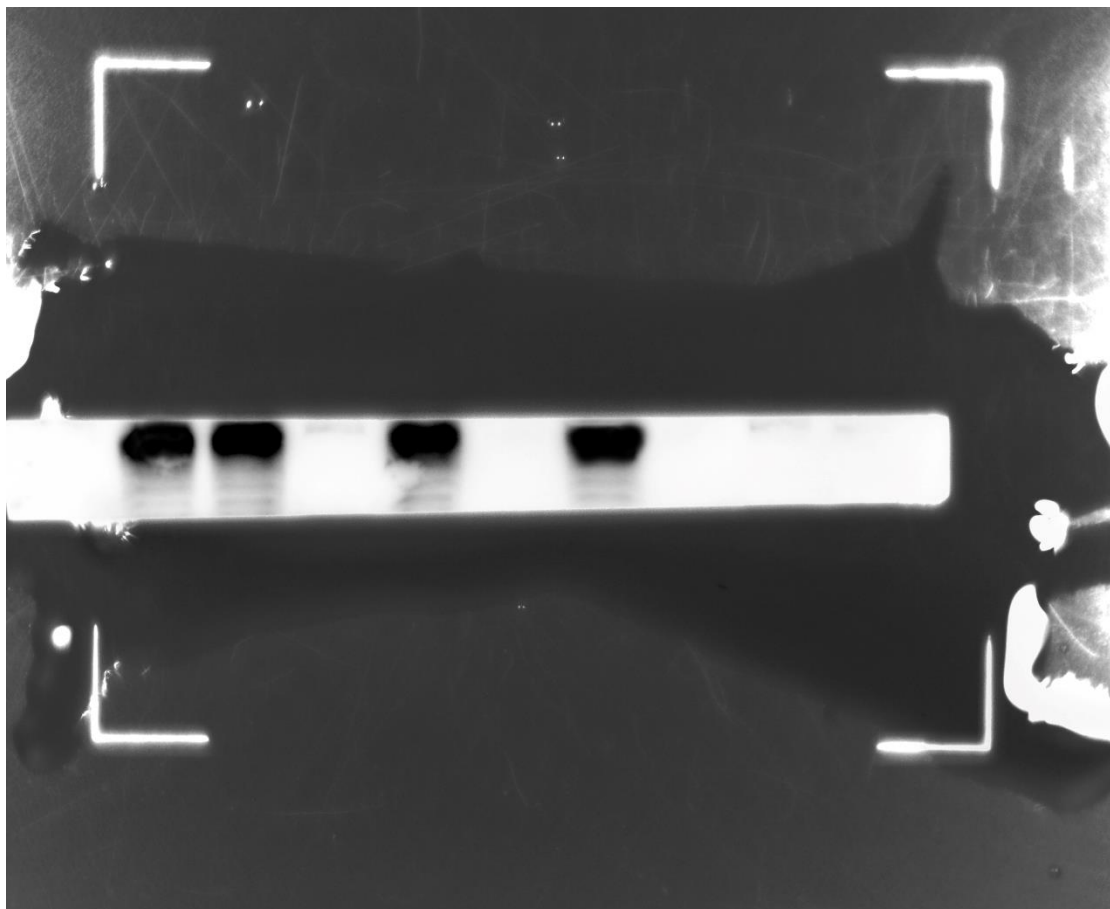

CRABP2

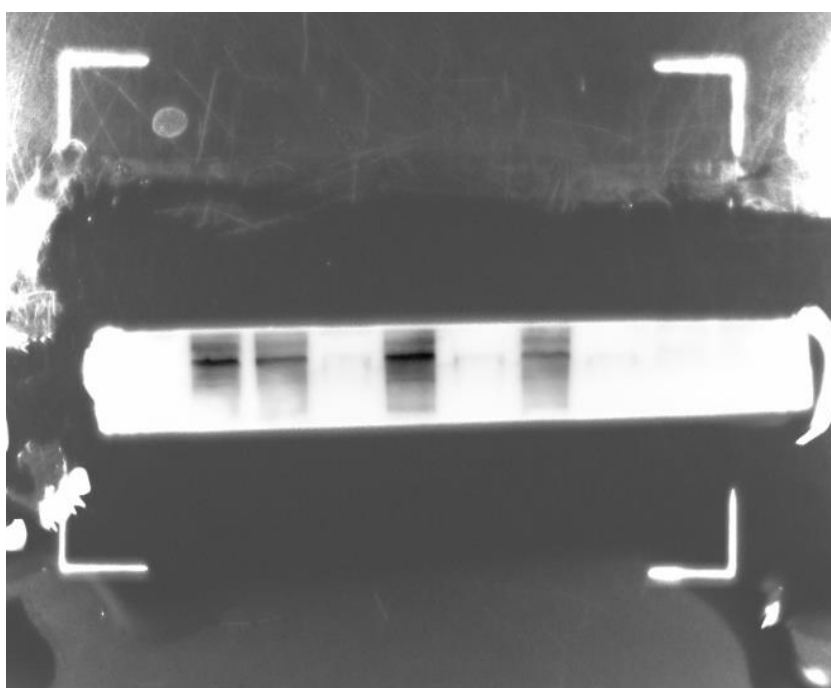

**GAPDH**

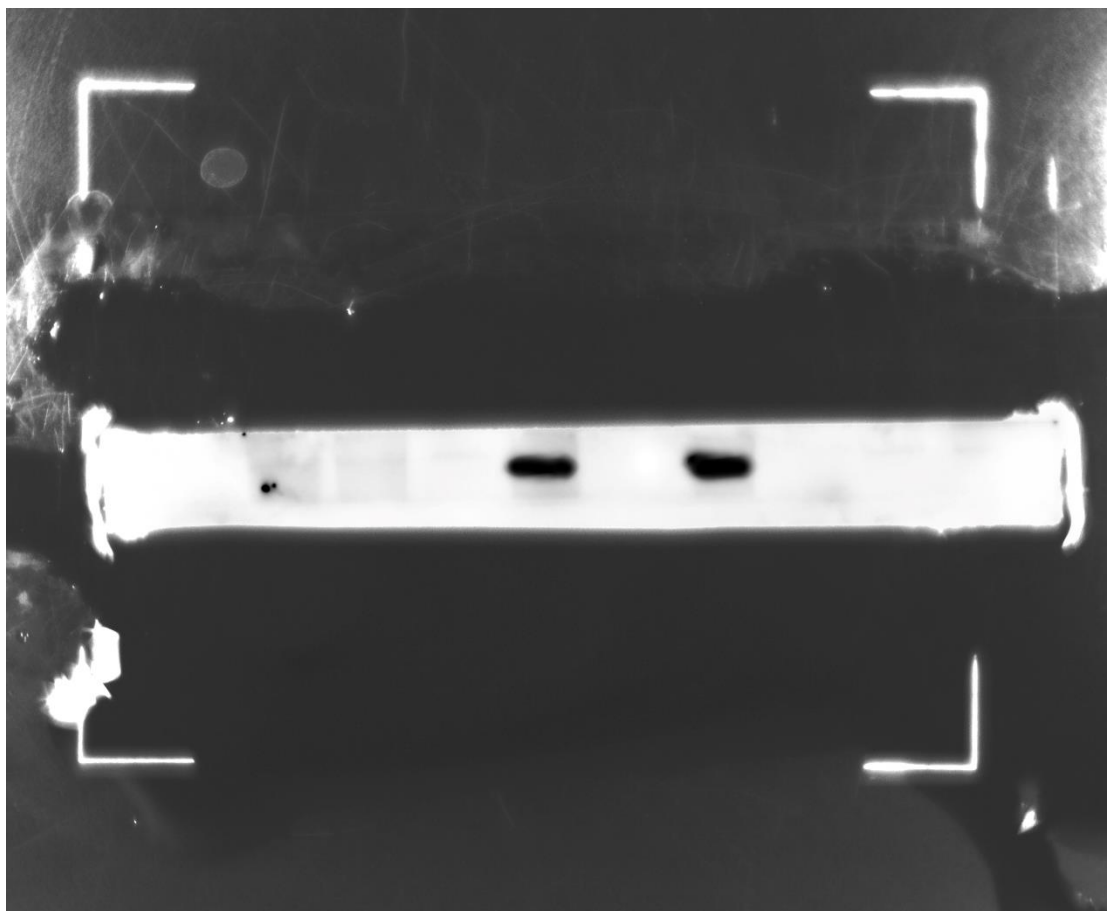

**PARKIN**

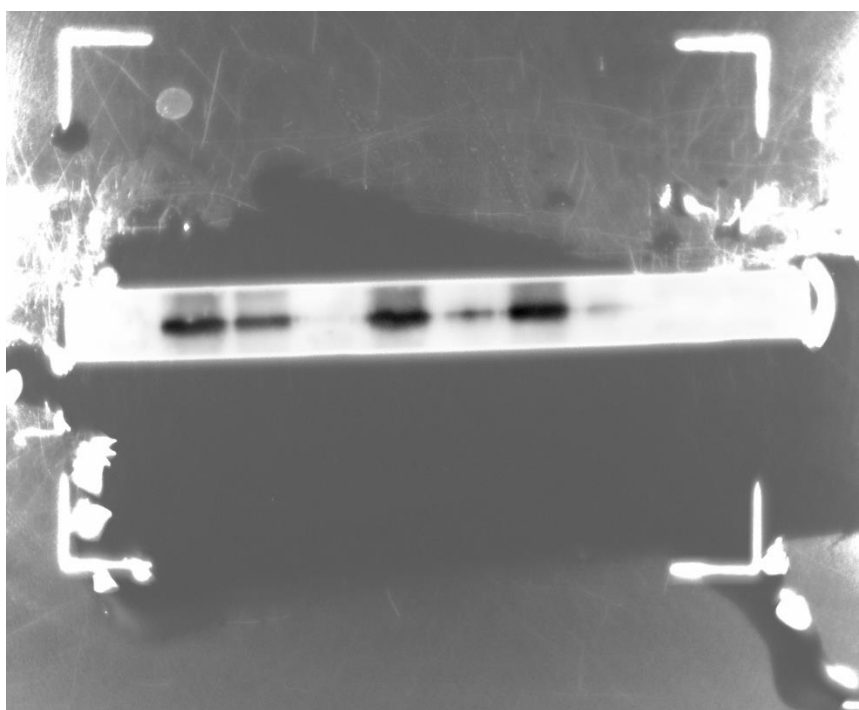

F3 F

BAX

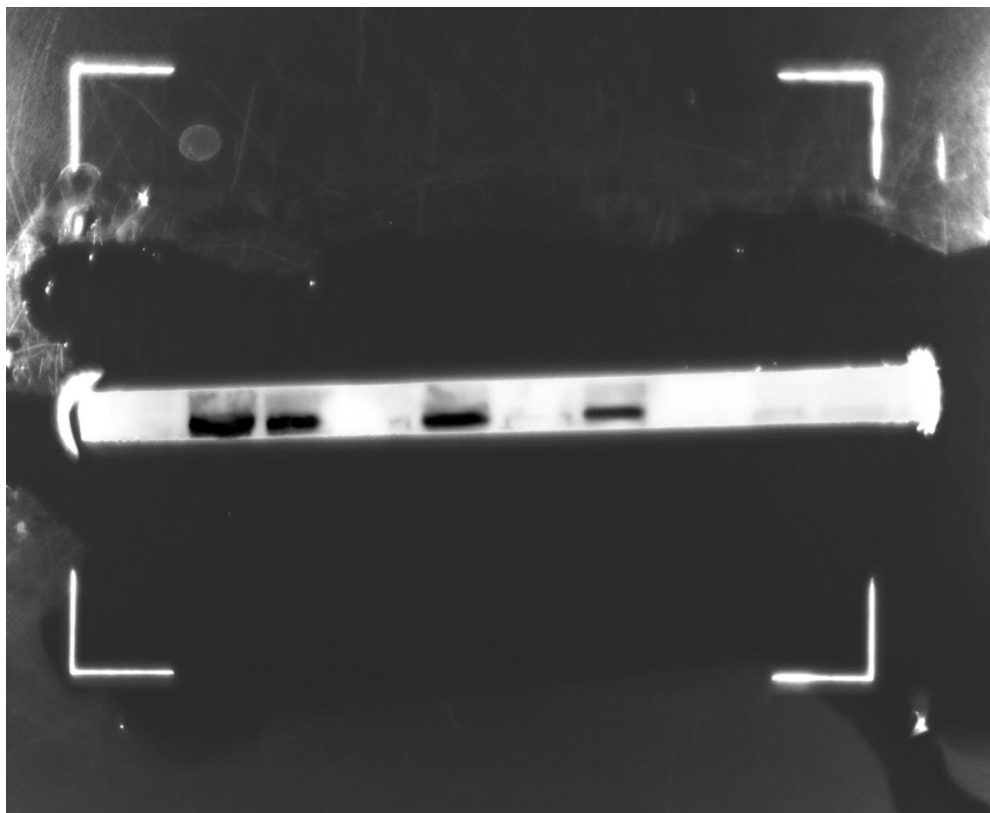

CRABP2

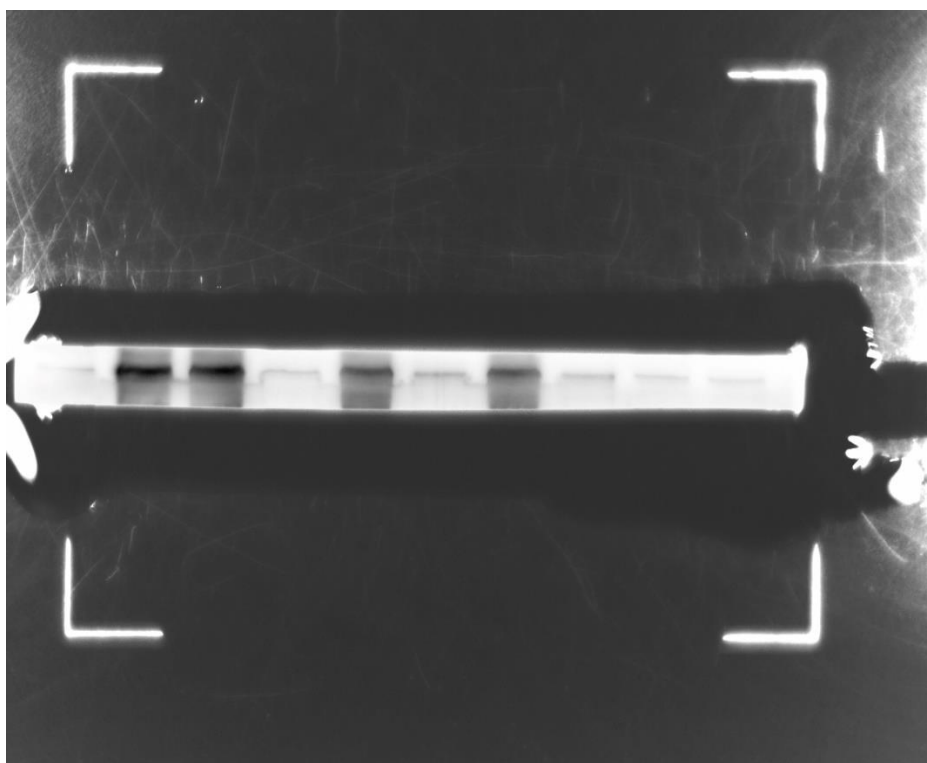

**GAPDH**

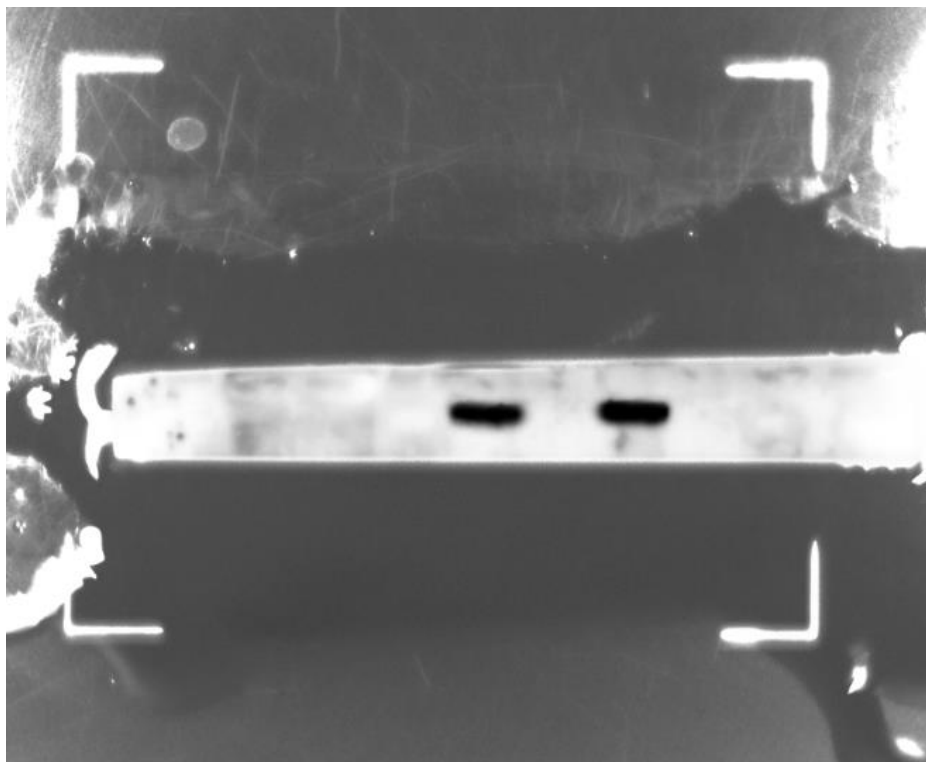

**PARKIN**

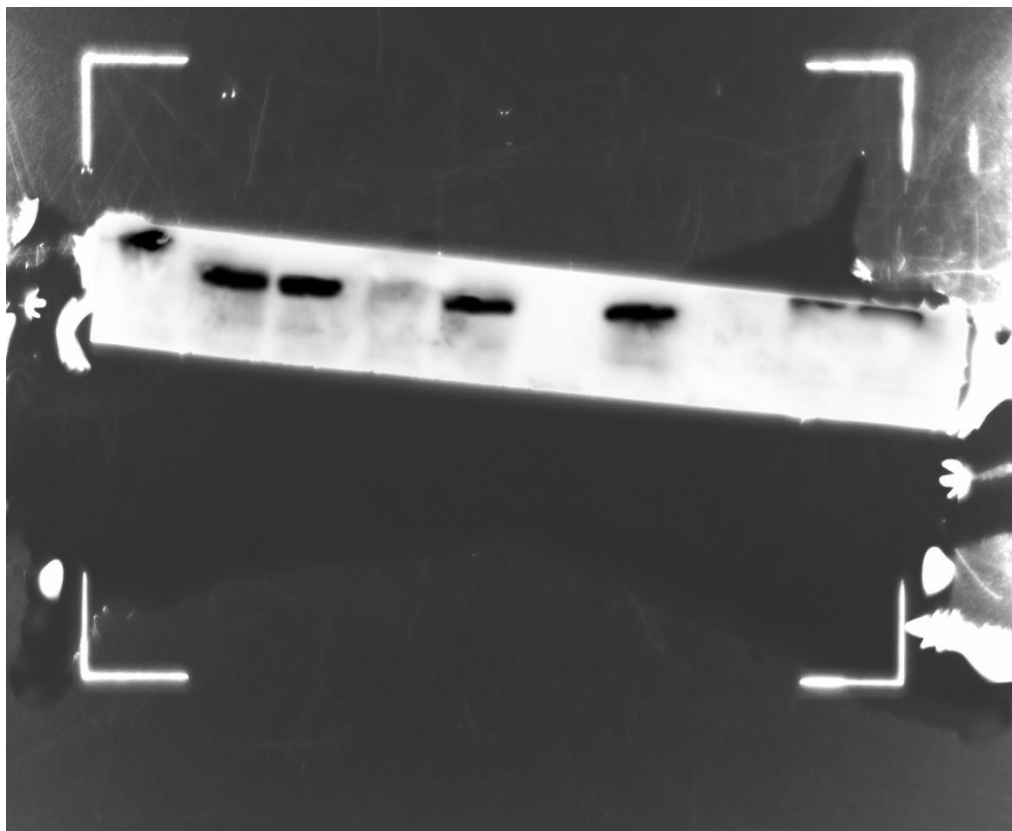

F3 G

BAX

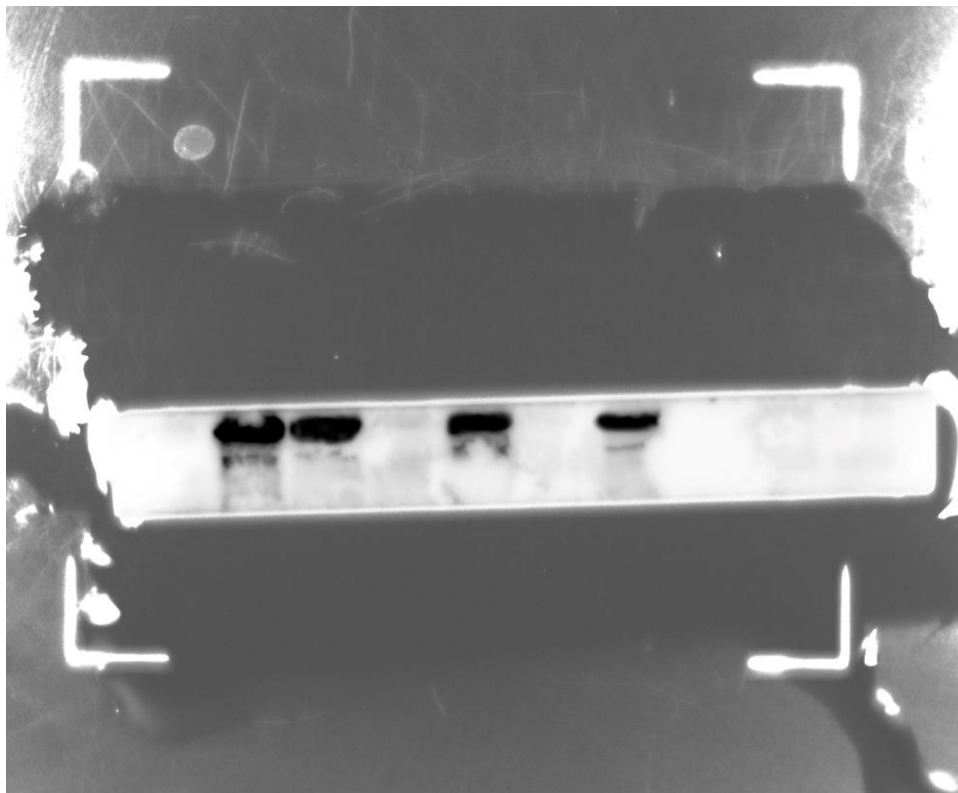

CRABP2

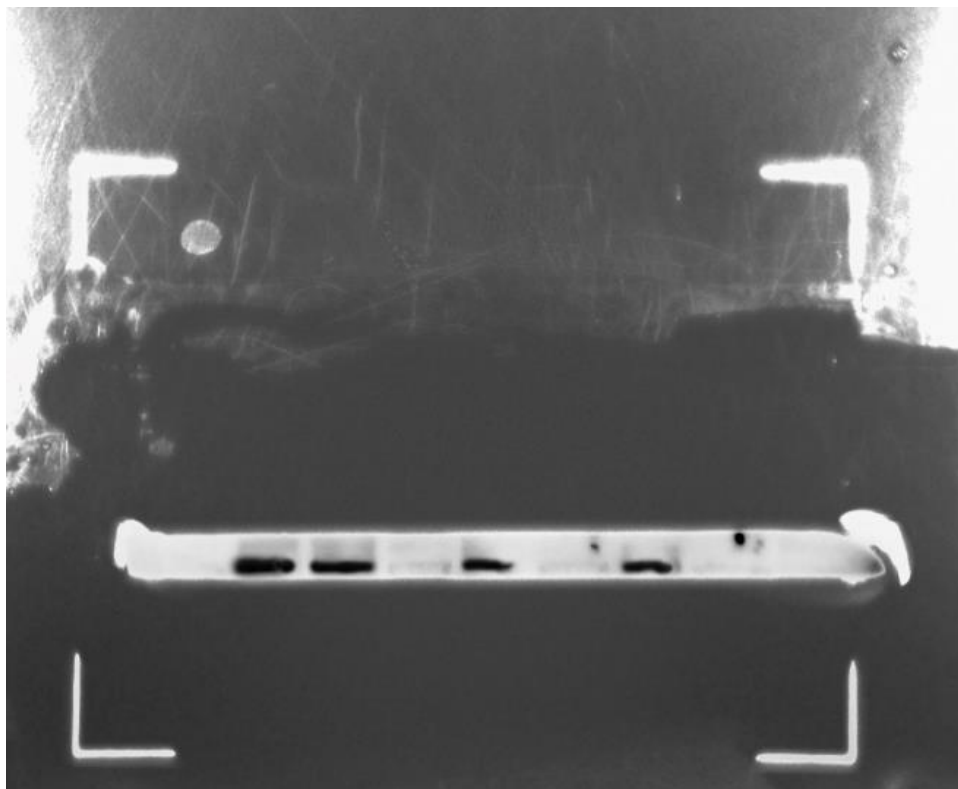

**PARKIN**

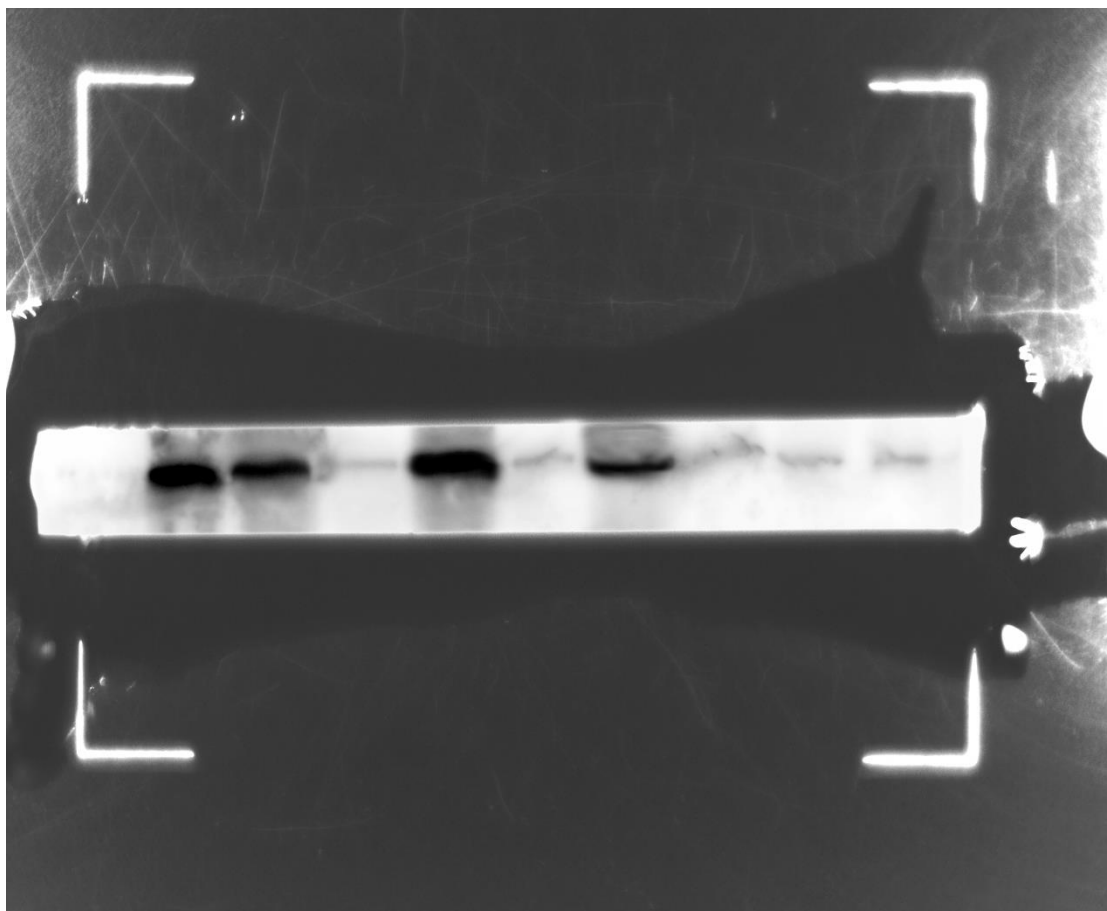

**GAPDH**

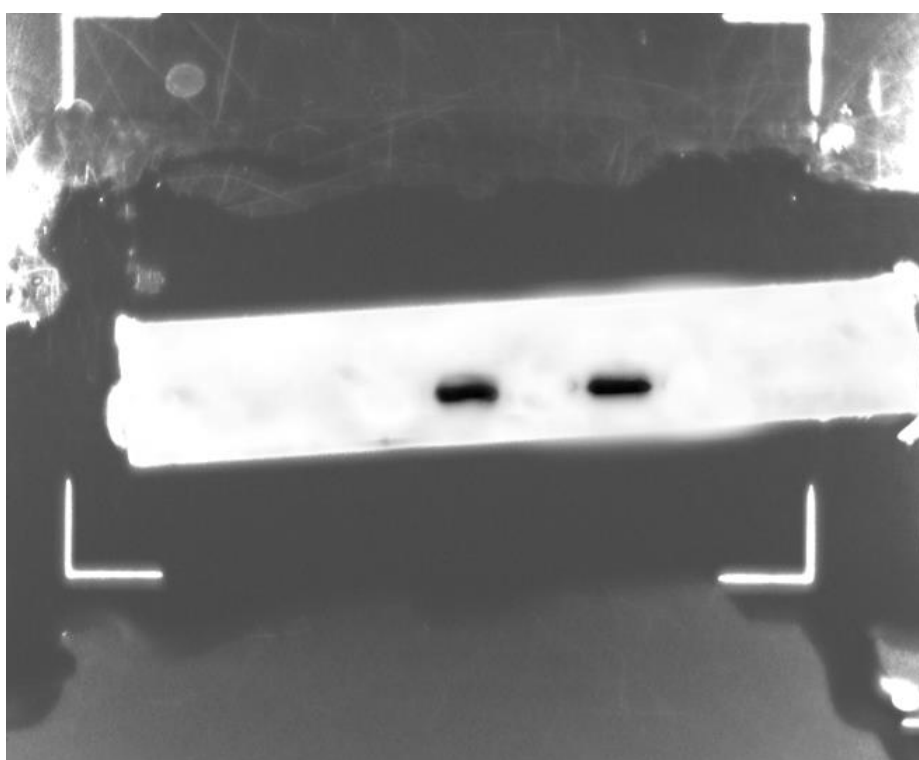



F3 J F3 K

Bax

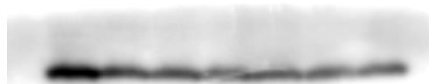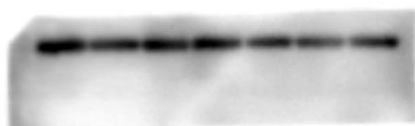

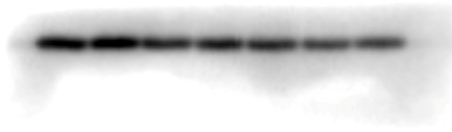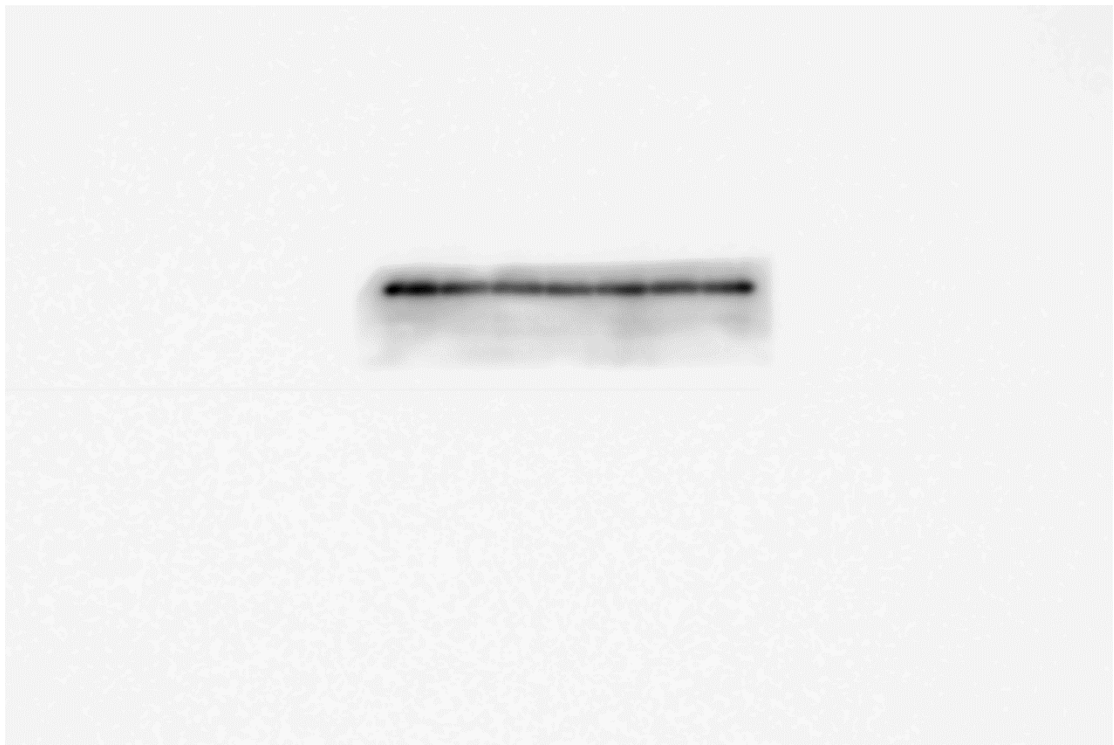

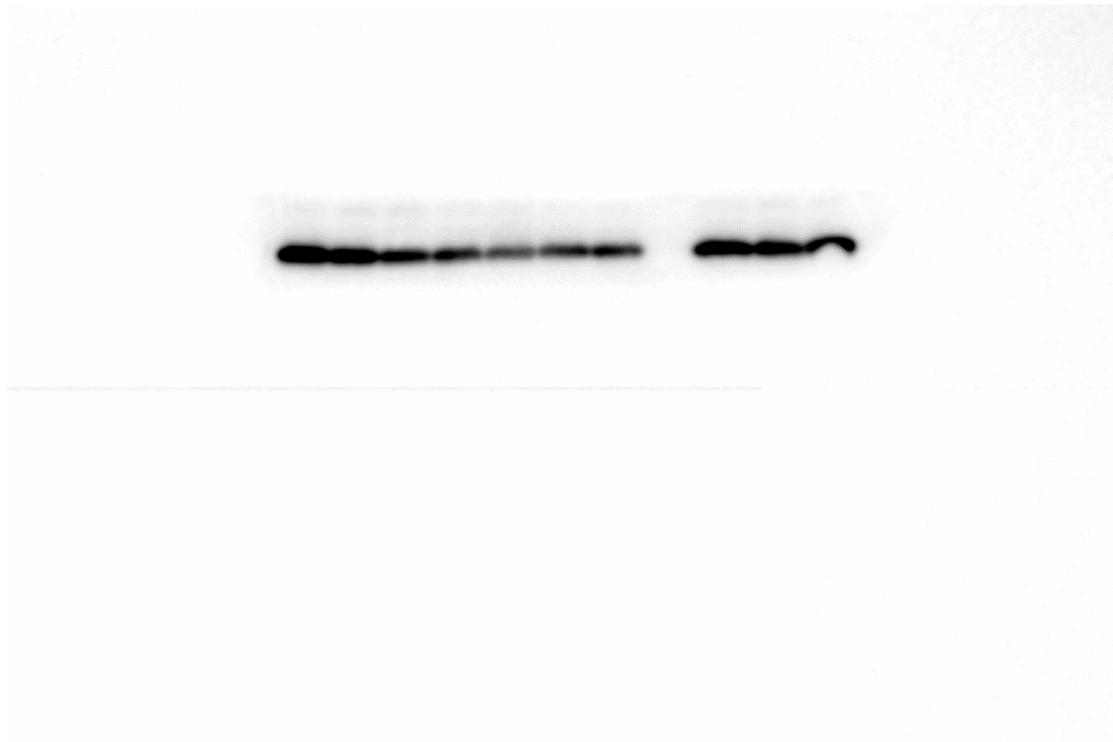

**ACTIN**

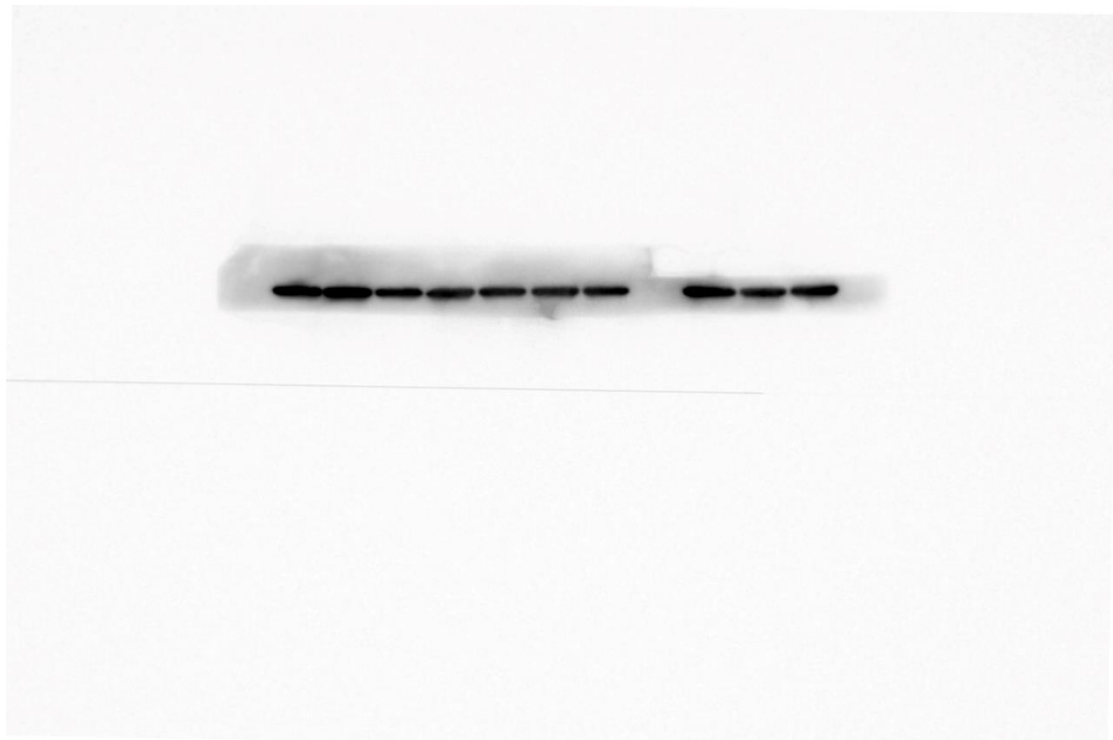

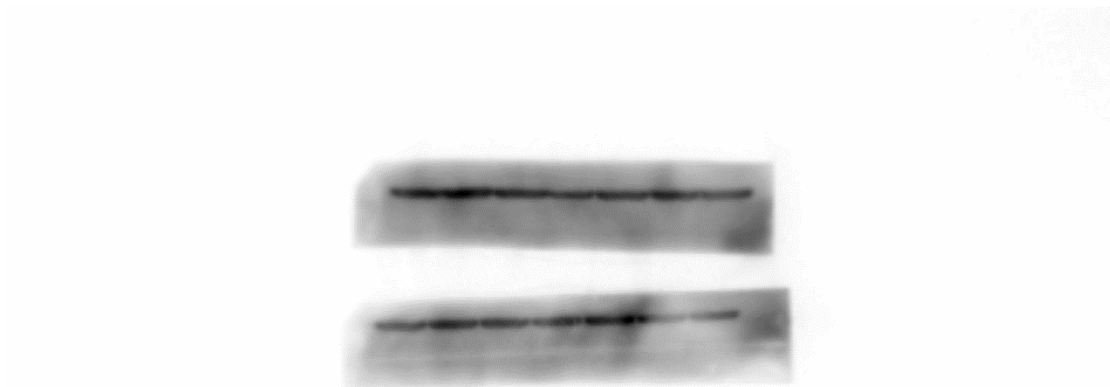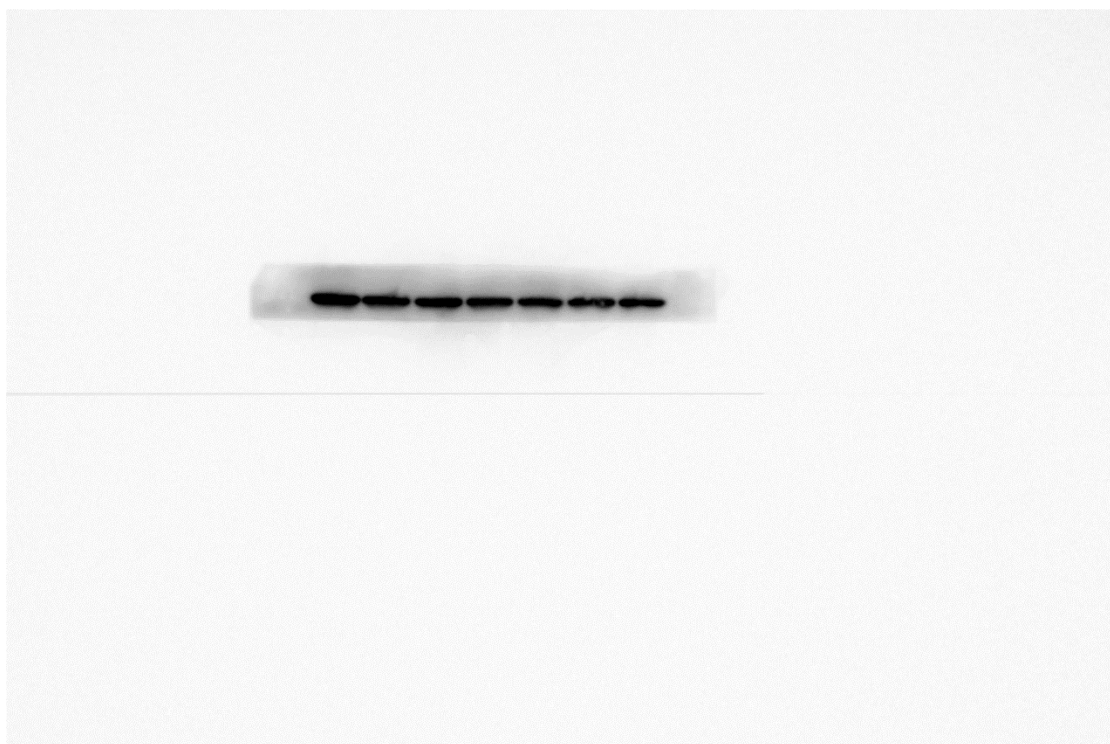

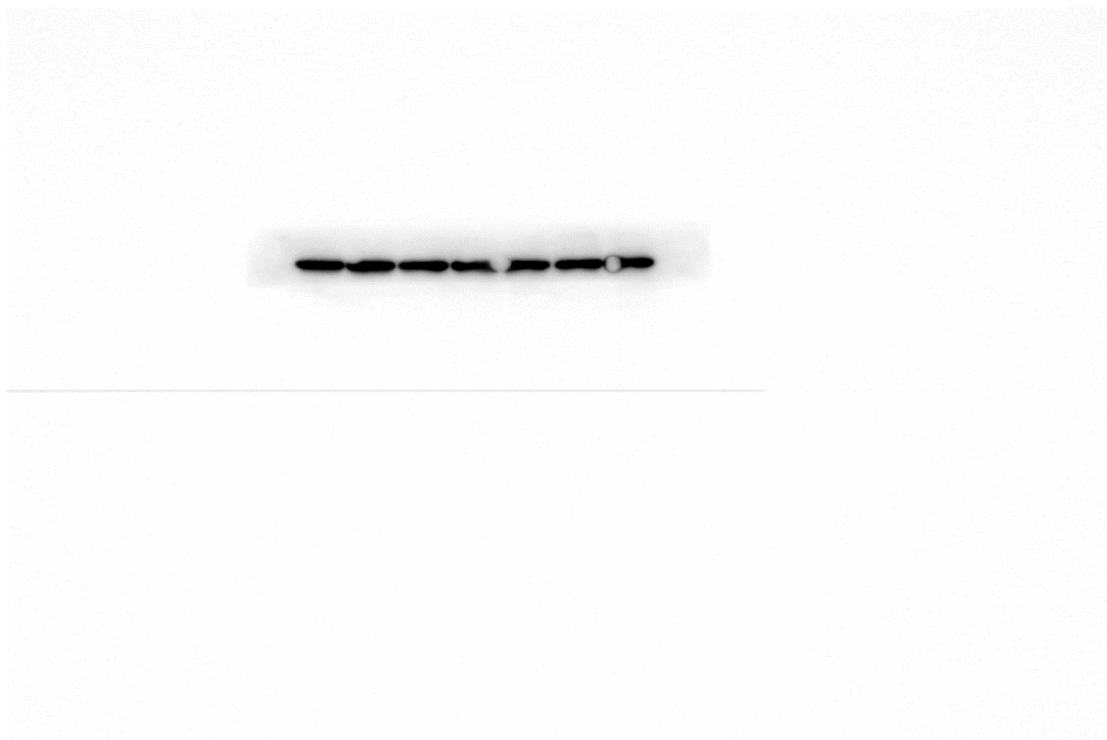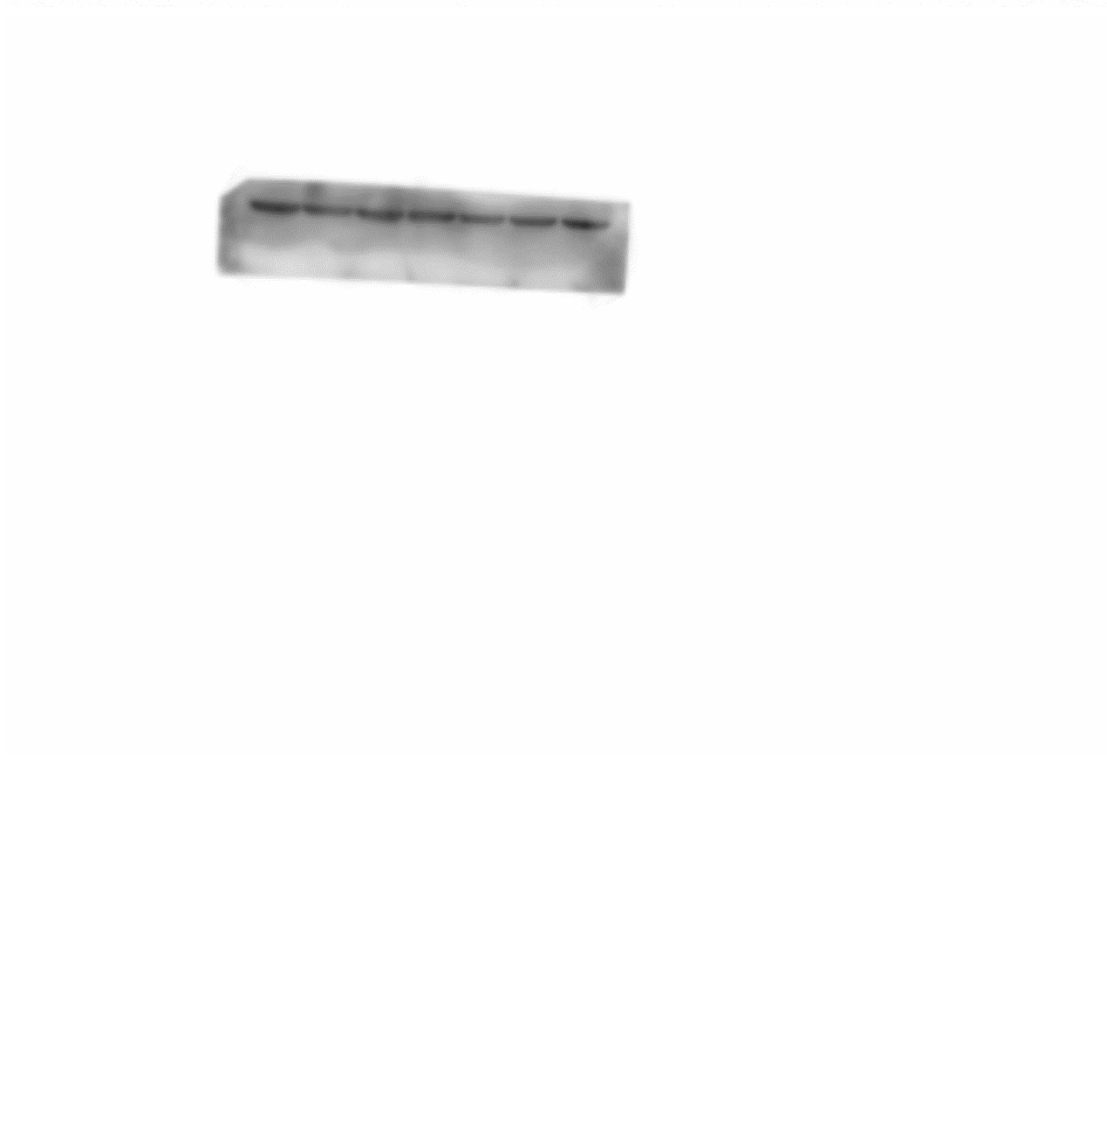

F4A LEFT

HA

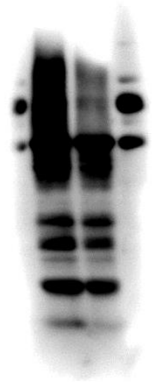

GAPDH

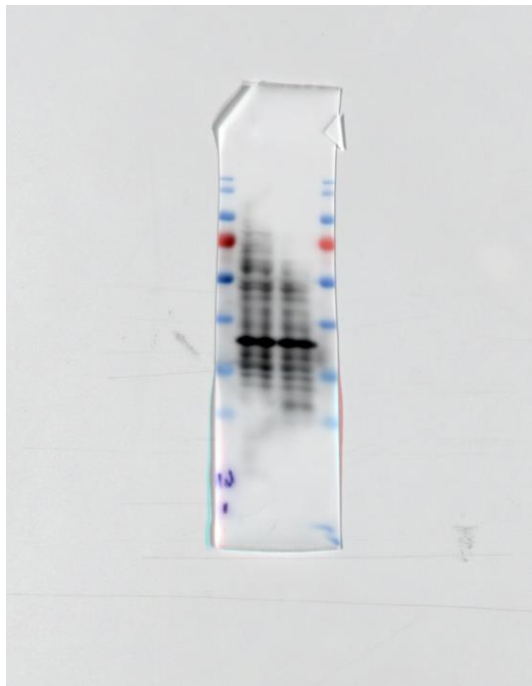

F4 A RIGHT F4 B RIGHT

HA

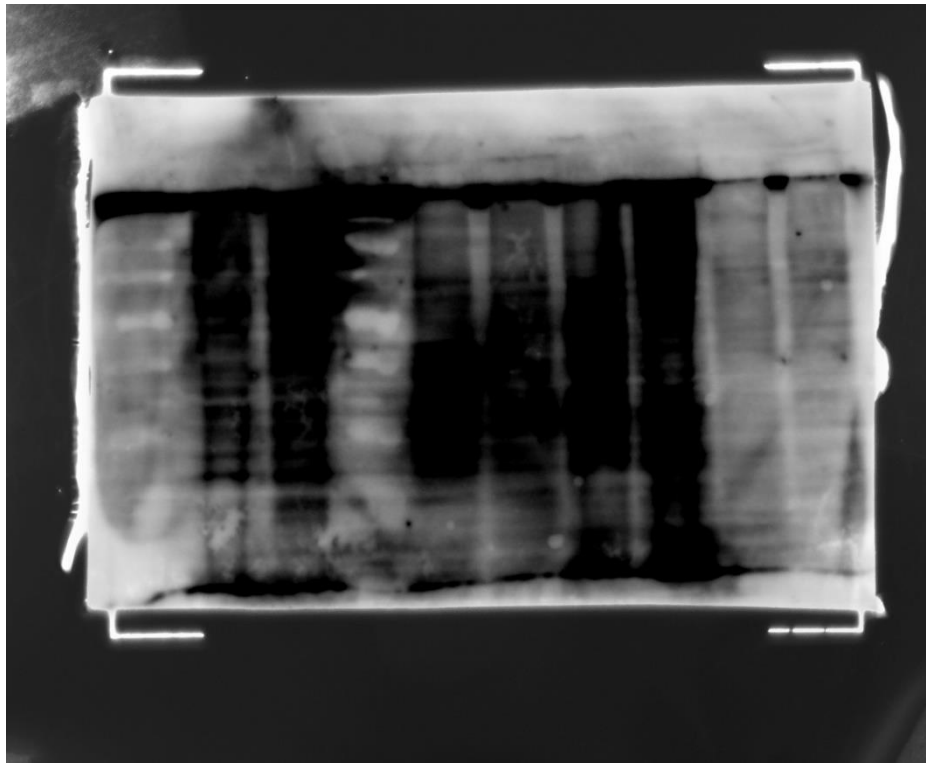

BAX IP

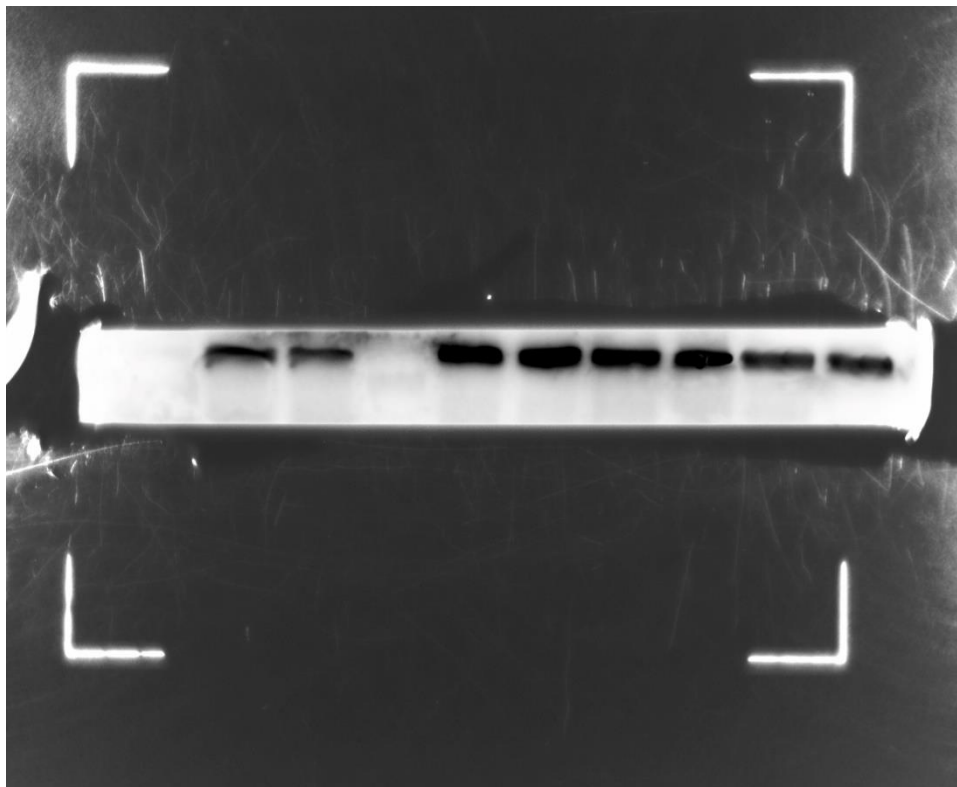

**BAX**

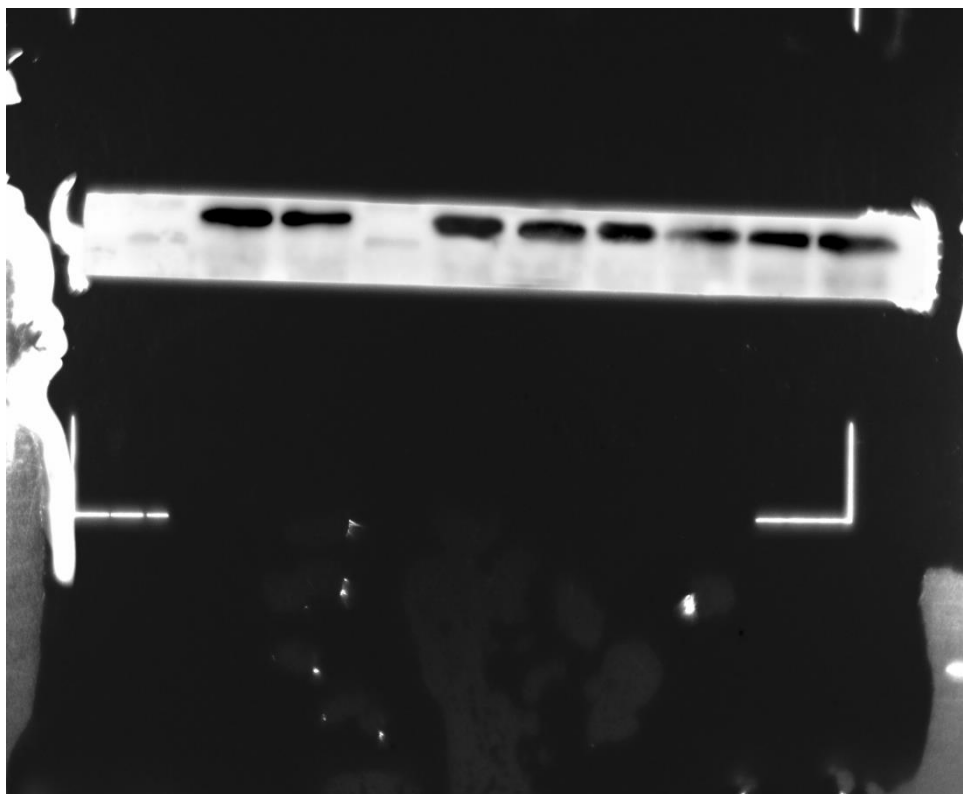

**CRABP2**

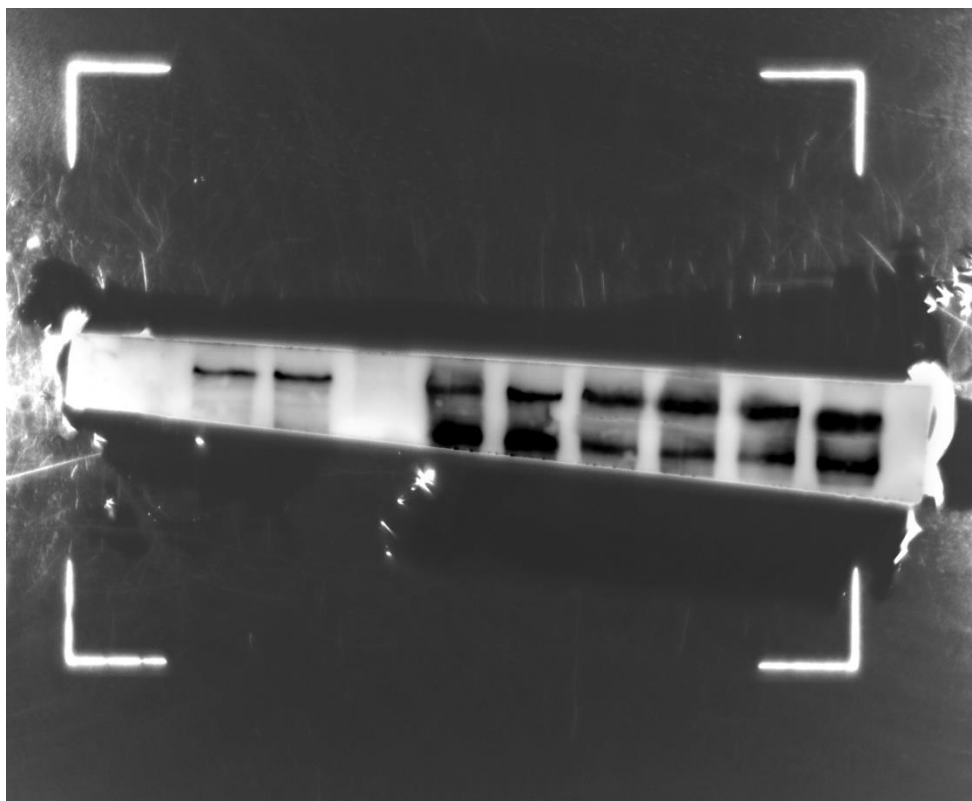



**GAPDH**

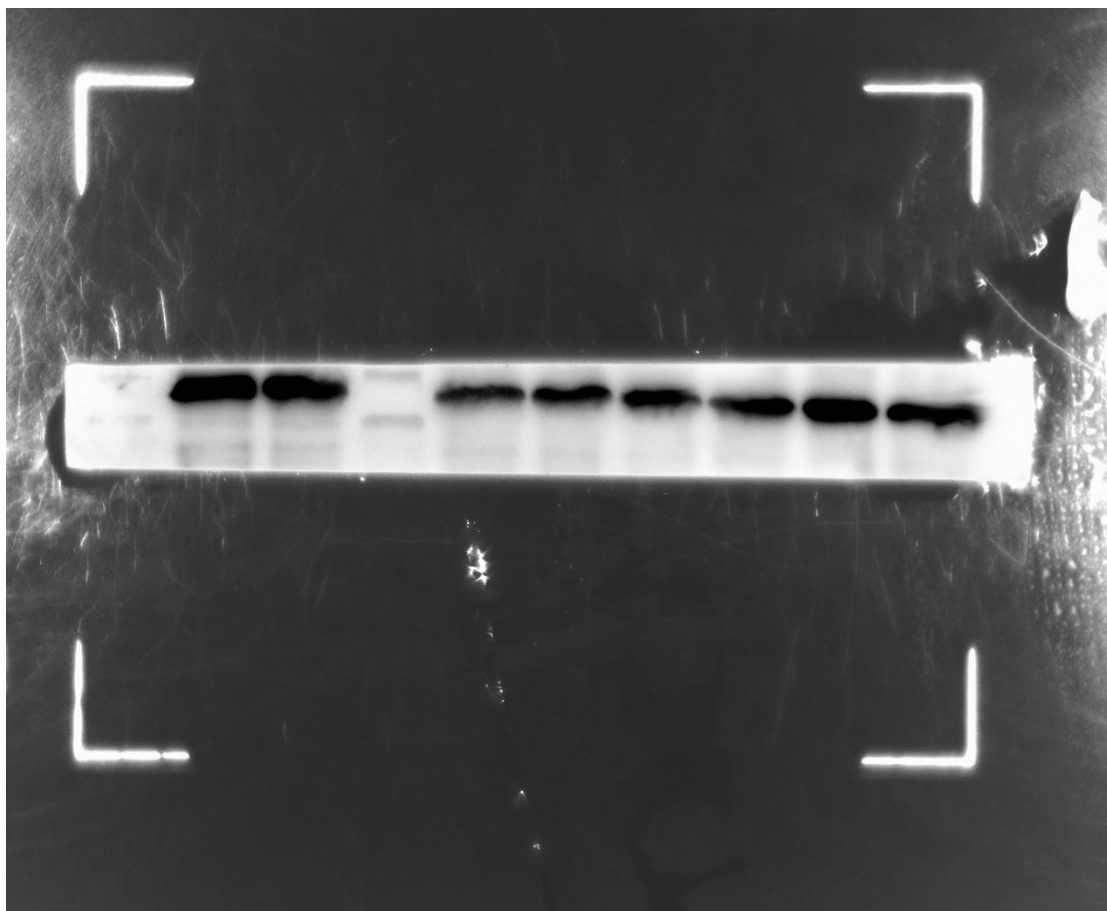

**F4 B left**

**HA**

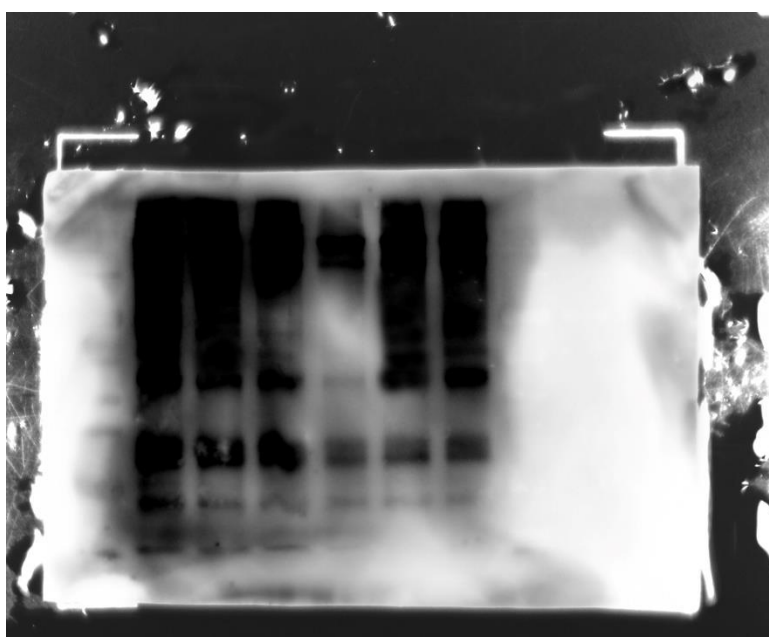

## BAX IP

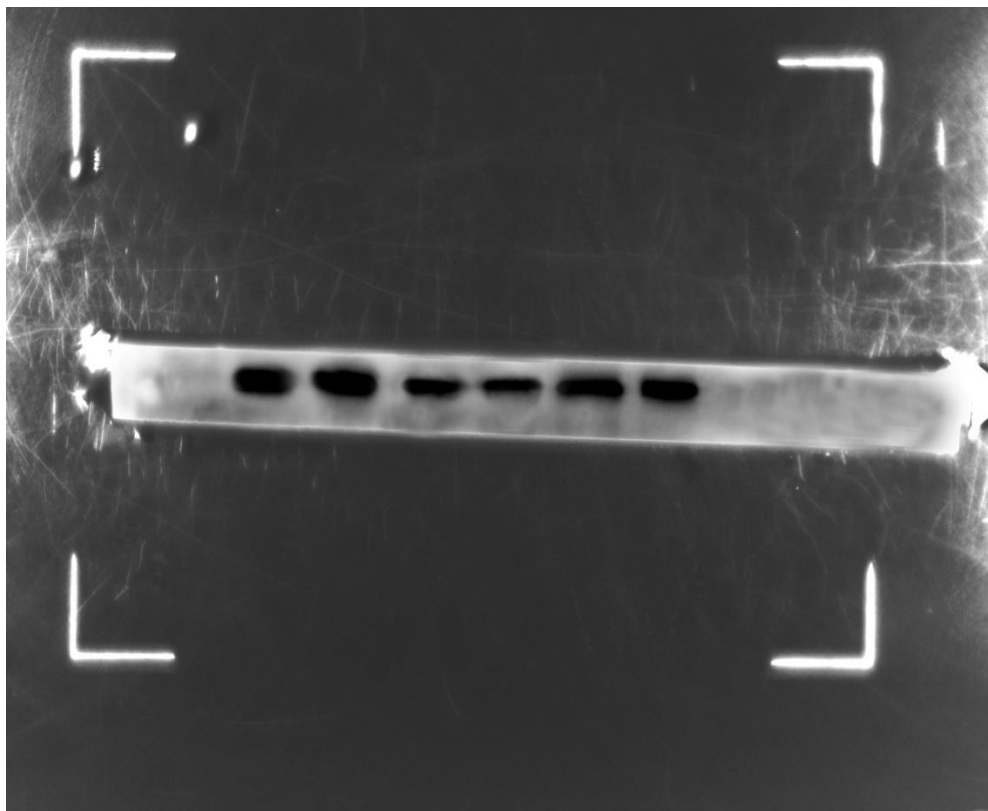

## BAX

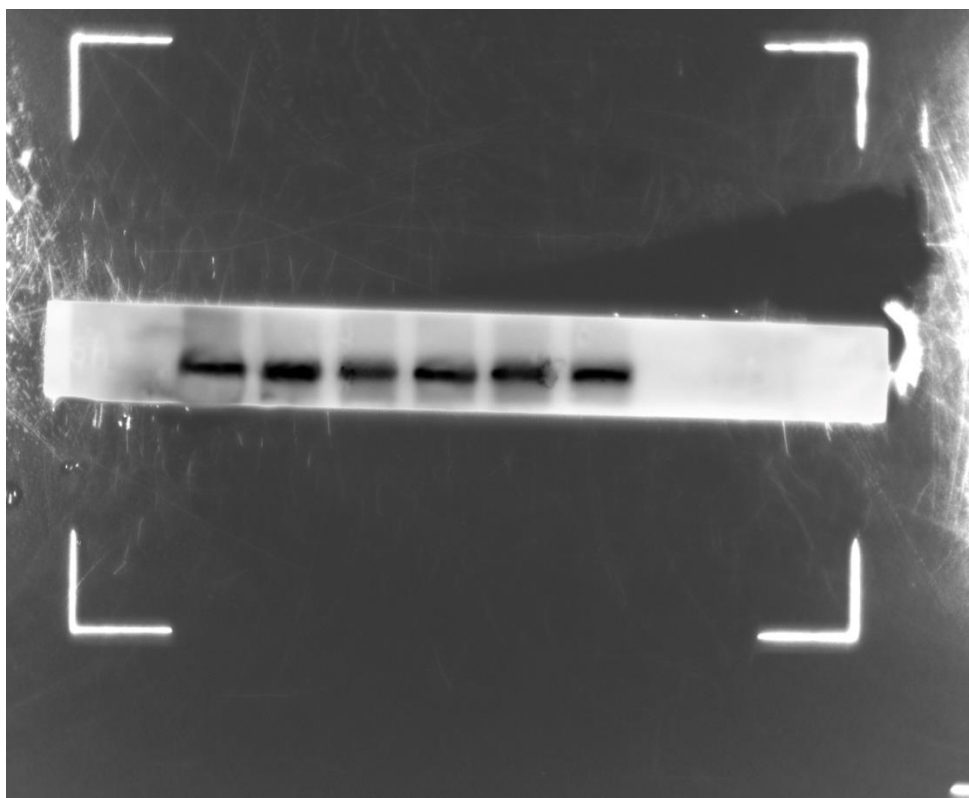

**CRABP2**

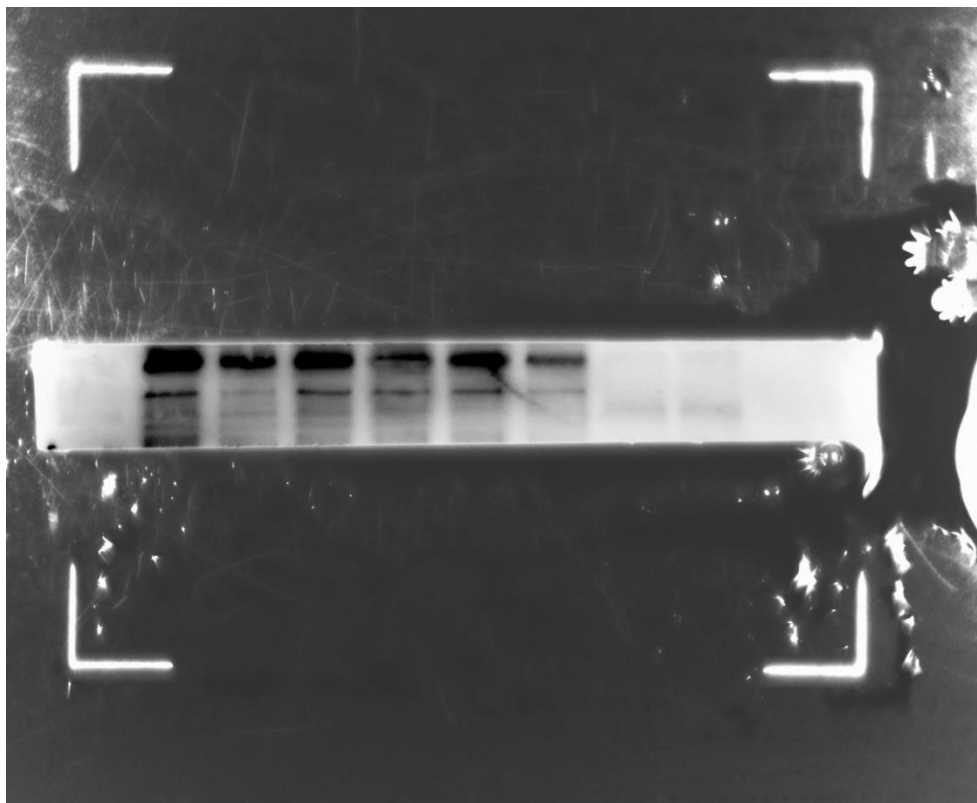

**GADPH**

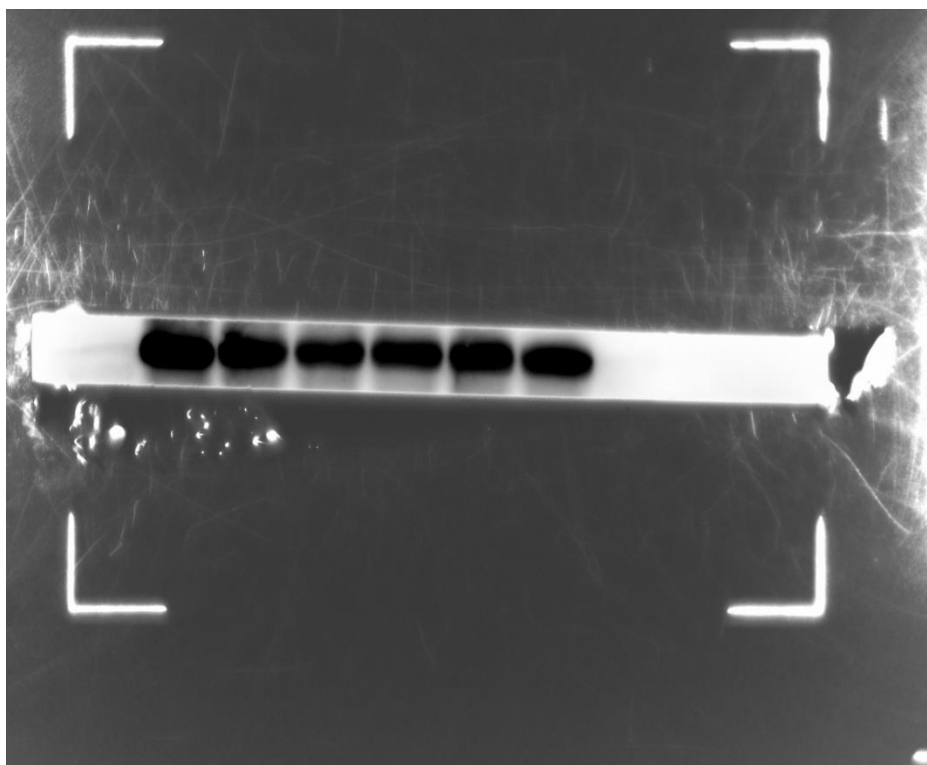

**F4 E**

**GADPH**

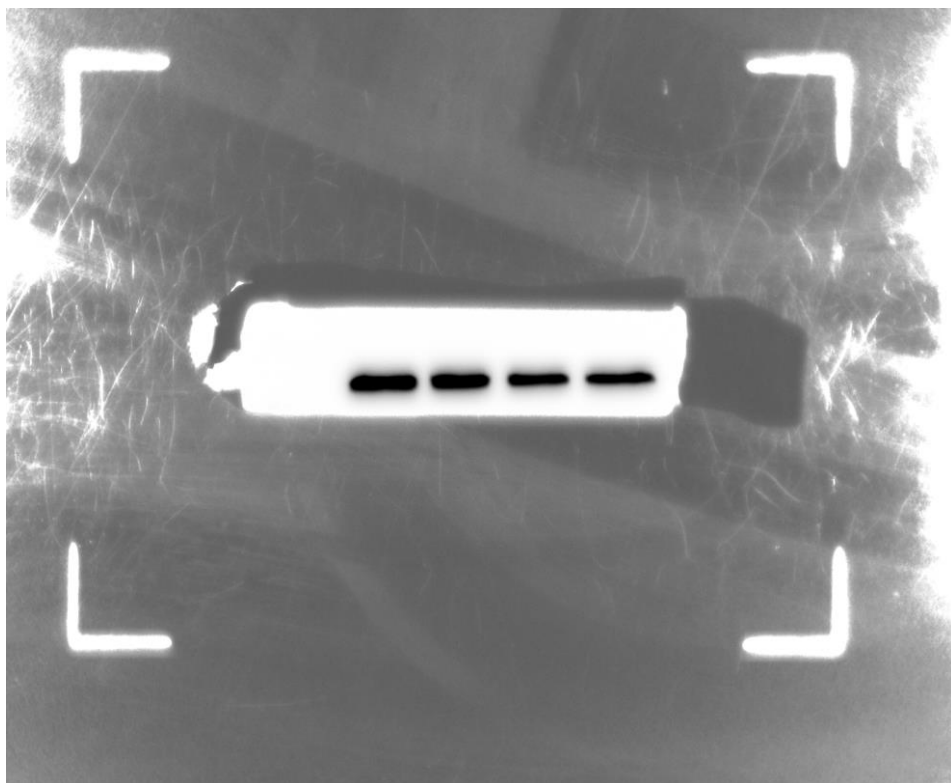

**CASPASE**

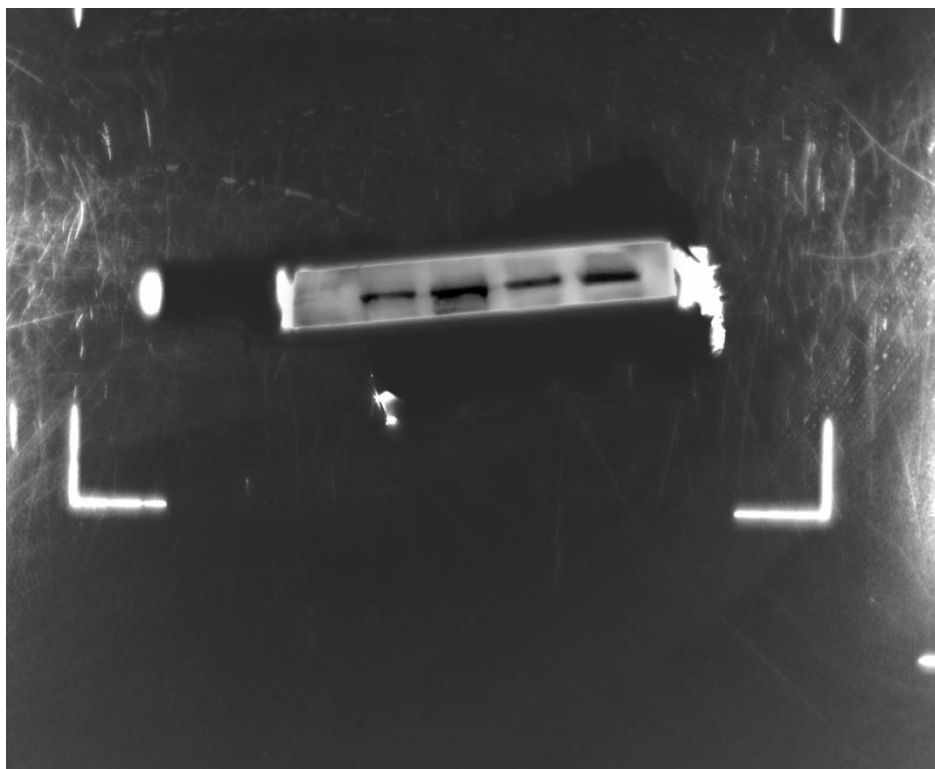

F4 F

ATR

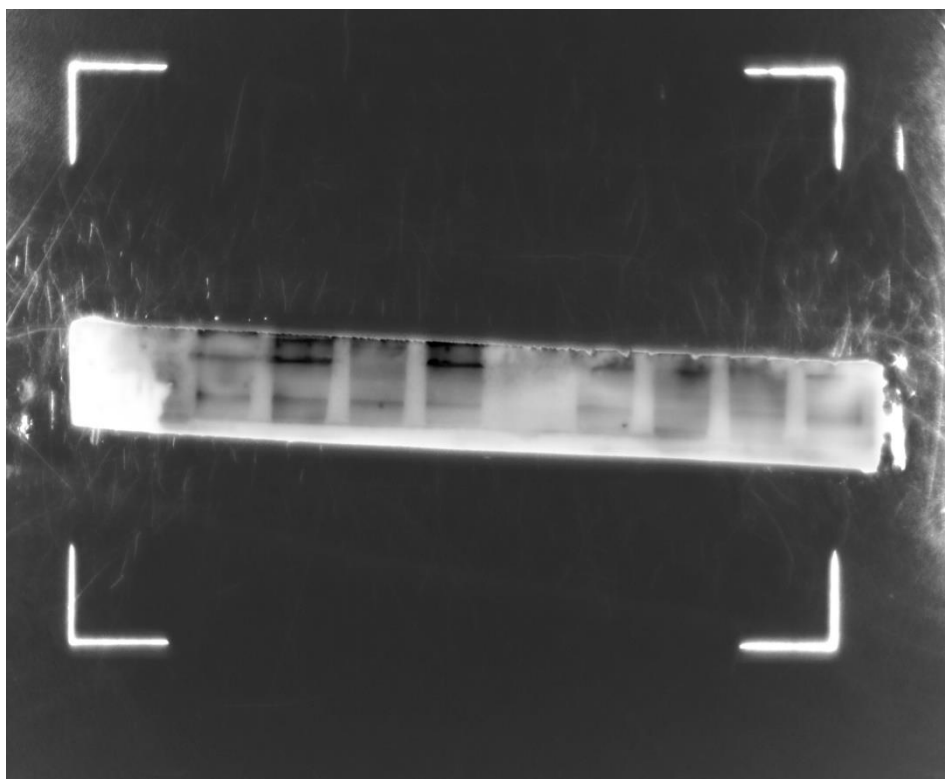

P-ATR

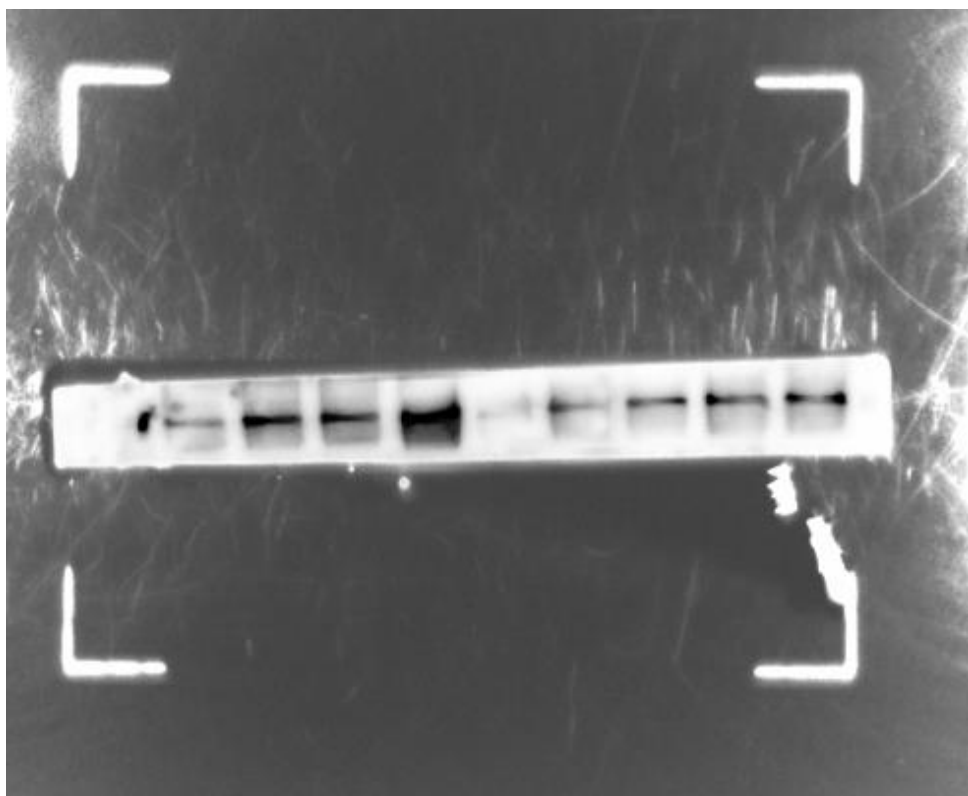

ATM

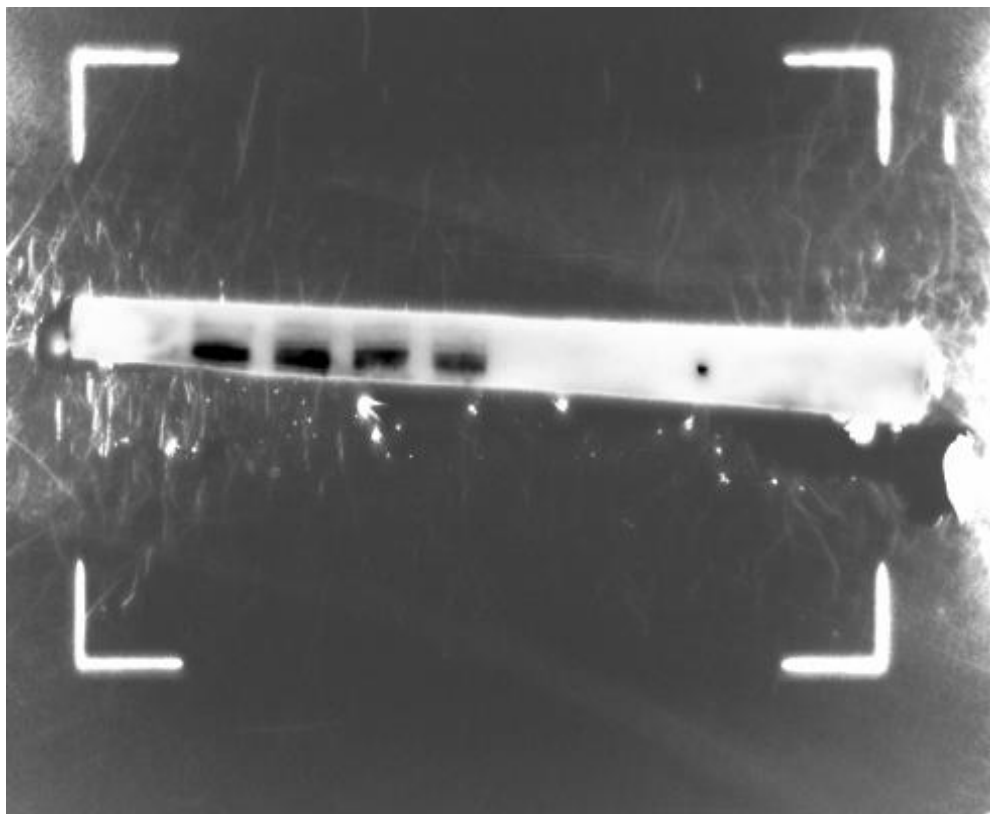

P-ATM

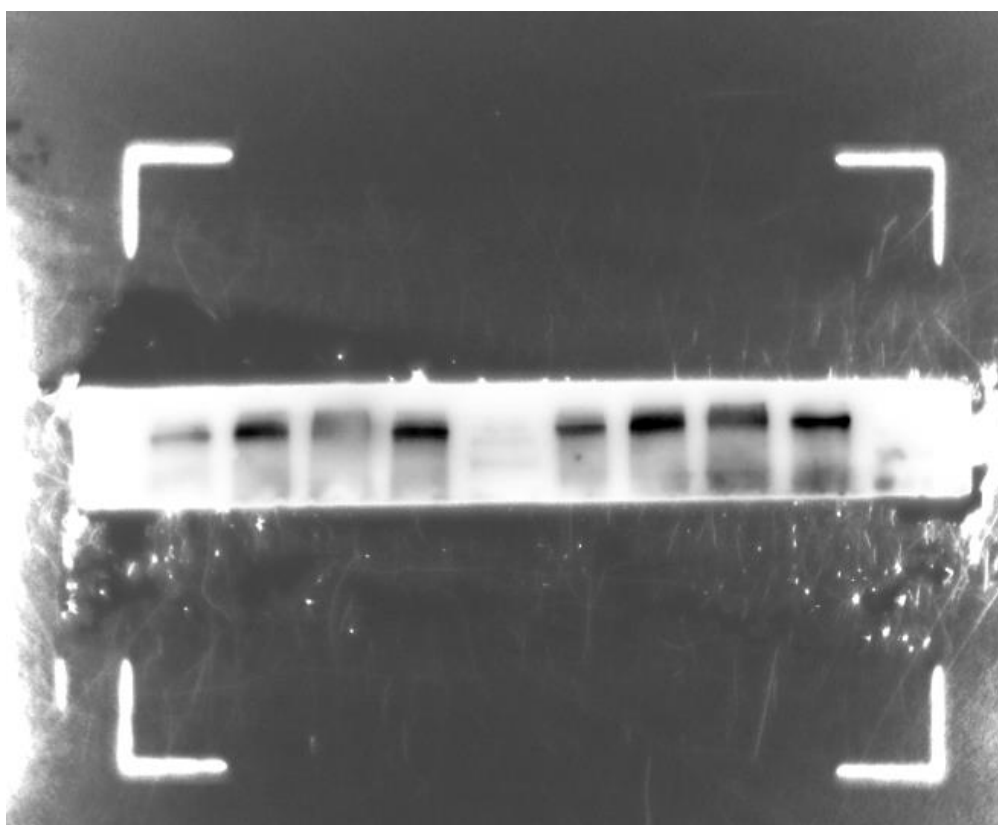

**P53**

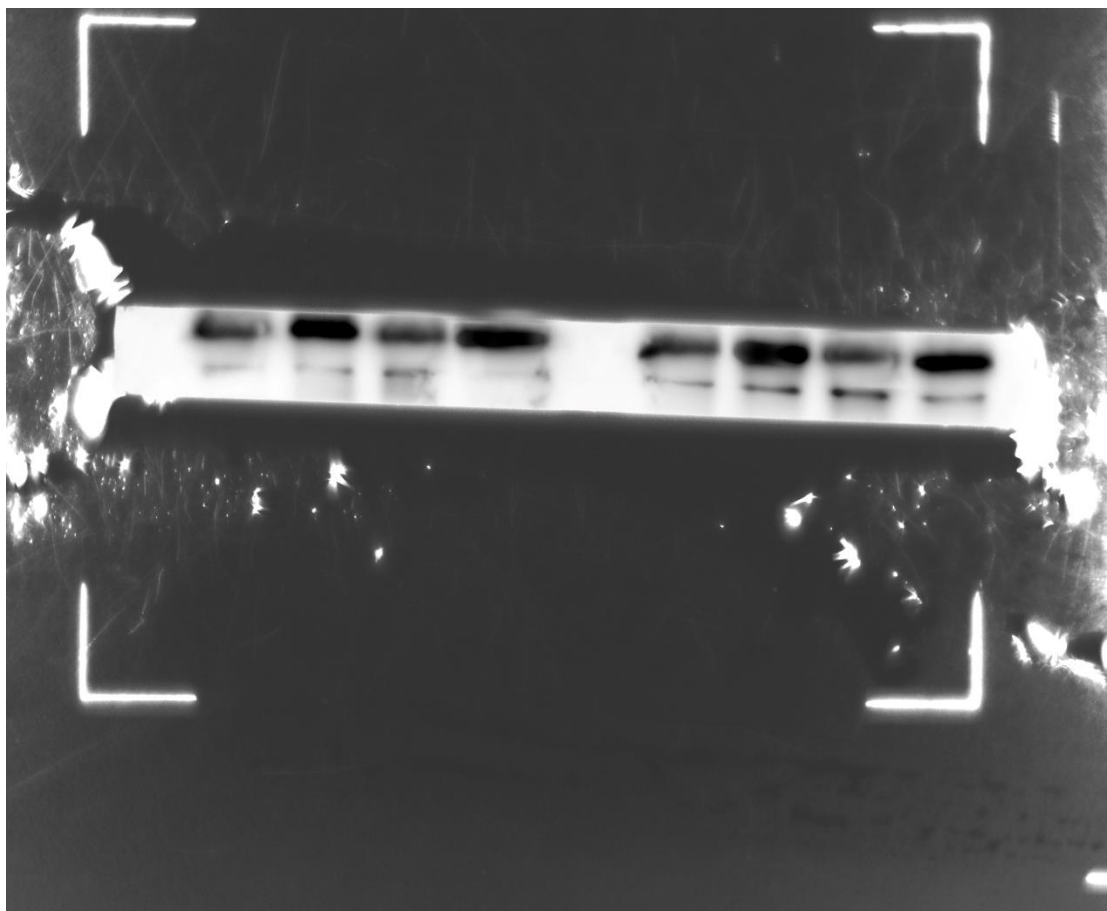

**P-P53**

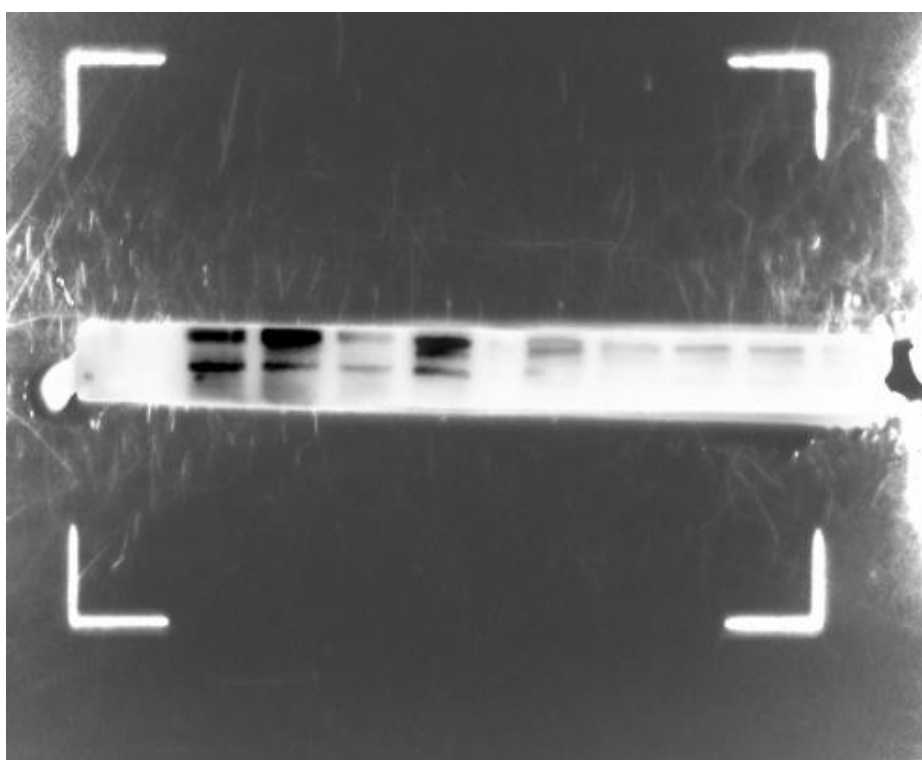



**BAX**

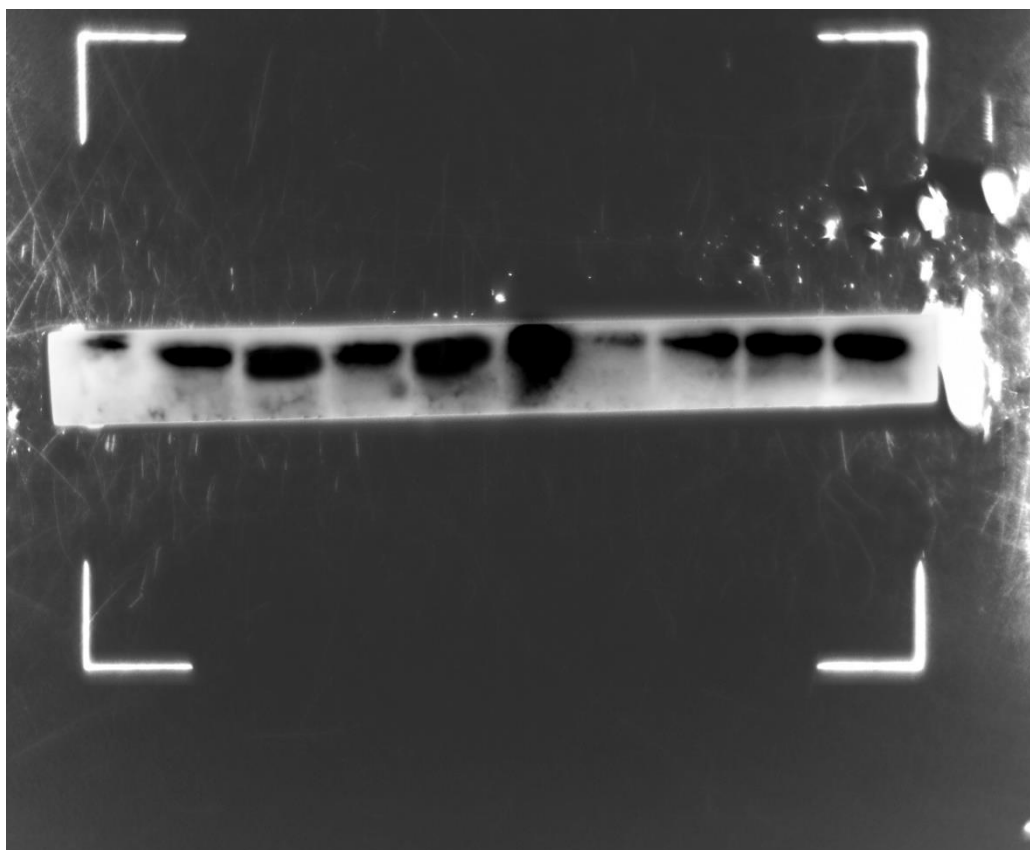

**GAPDH**

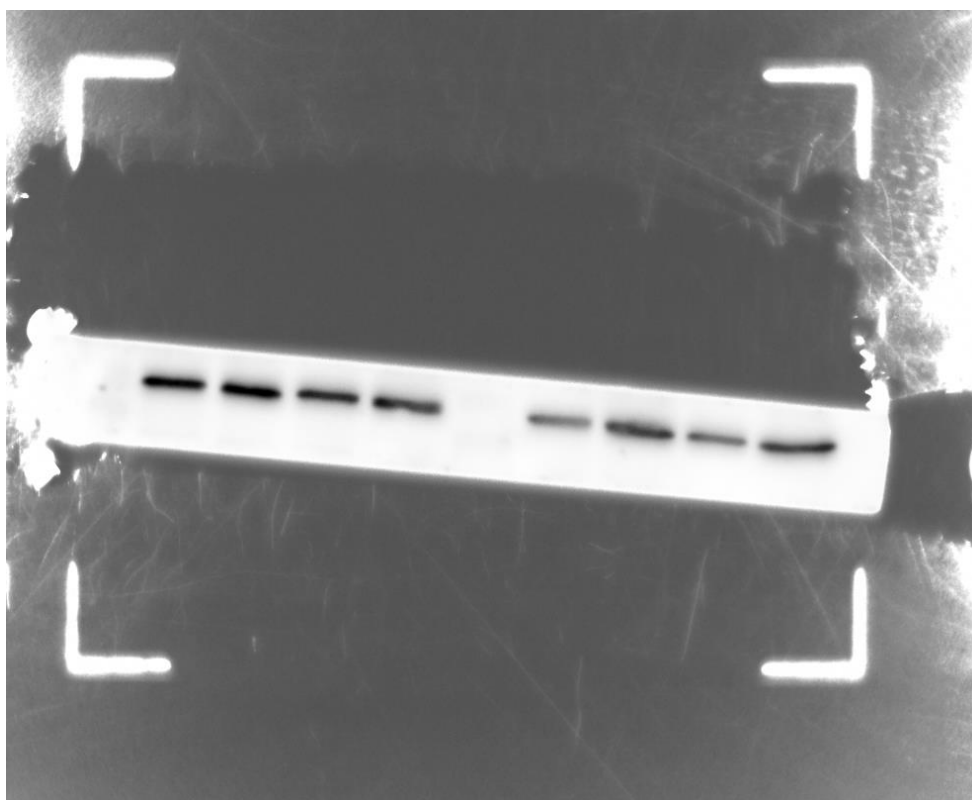



F4 G

BAX

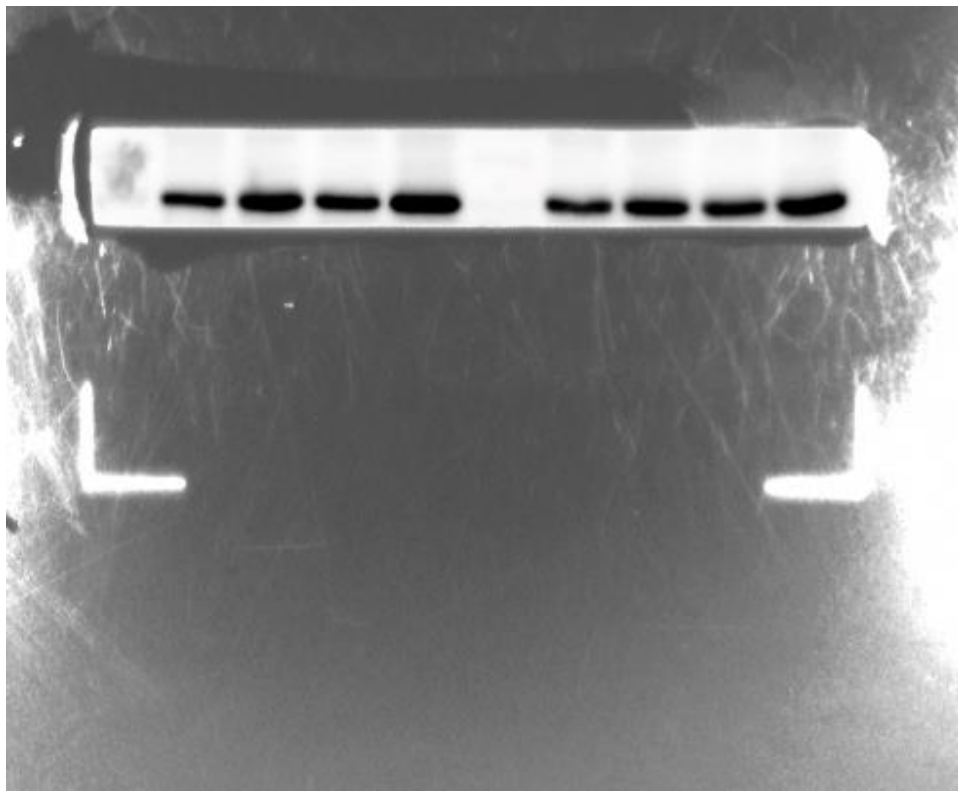

TOMM40

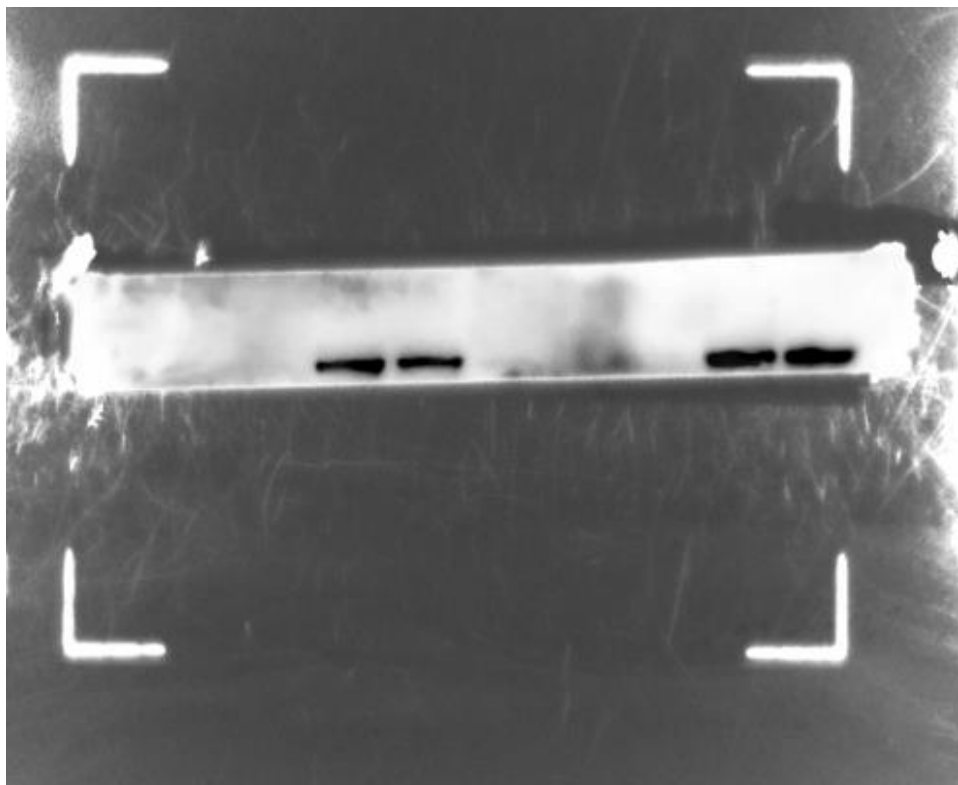

**TUBULIN**

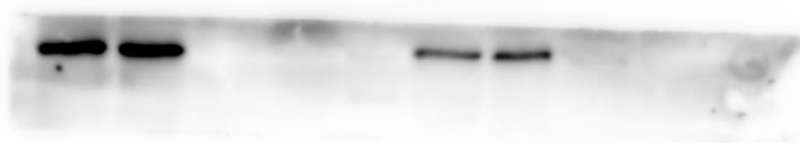

**F4 I LEFT**

**GAPDH**

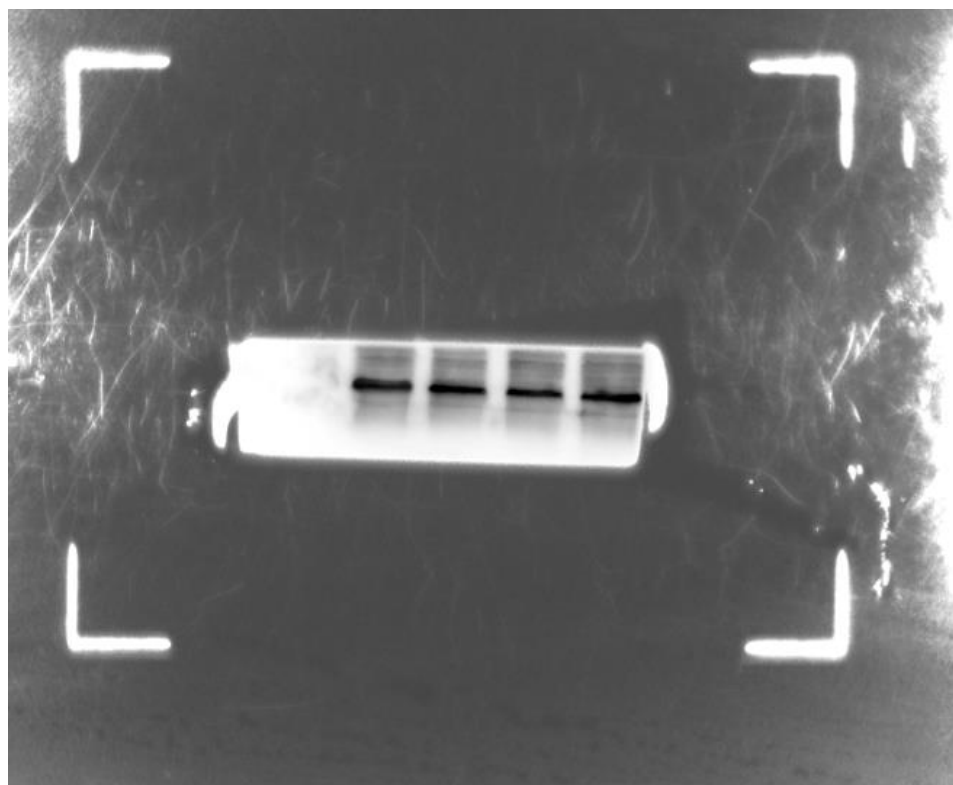

**CRABP2**

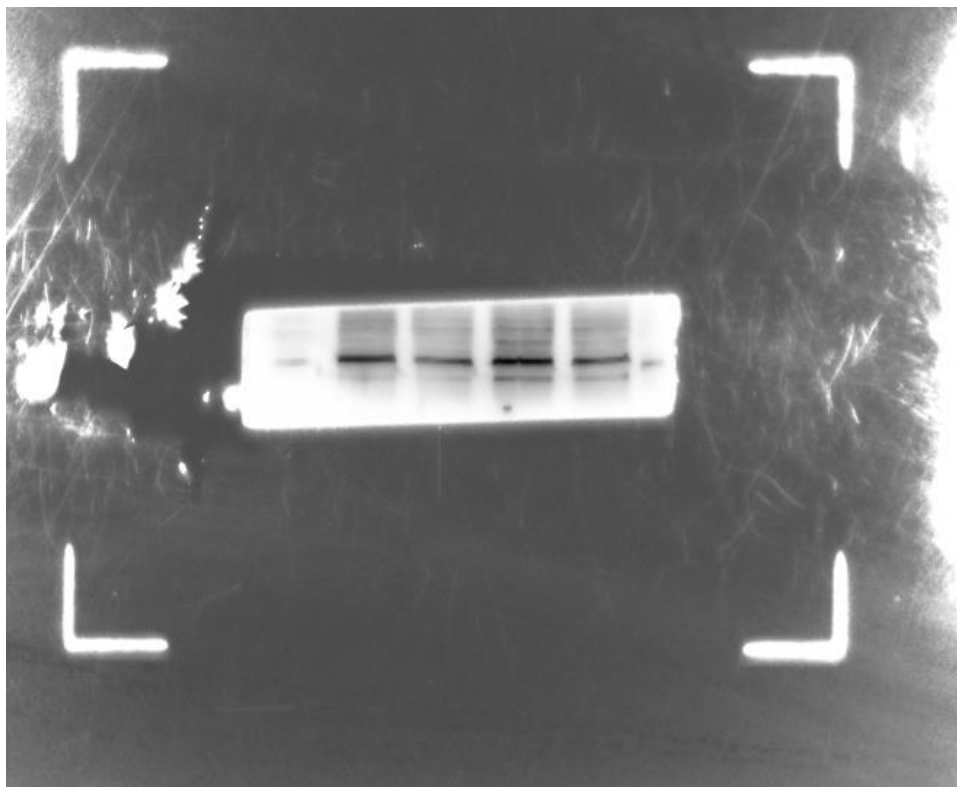

**CASPASE**

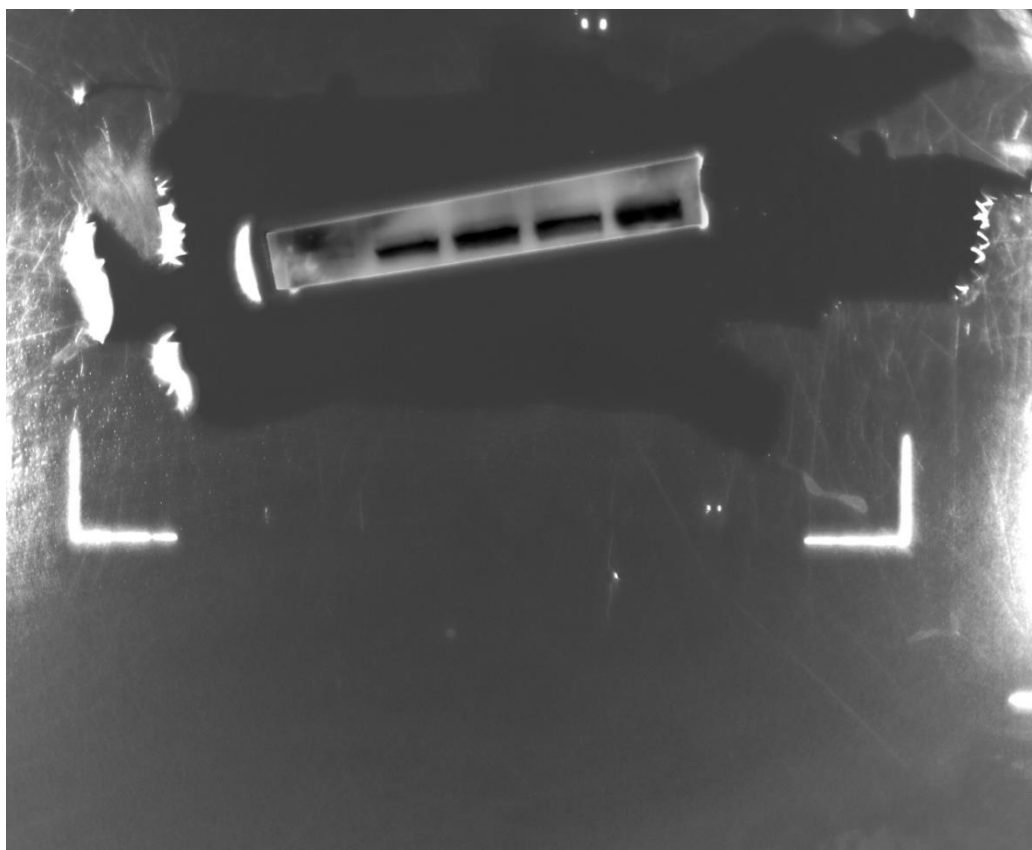

**RIGHT**  
**GAPDH**

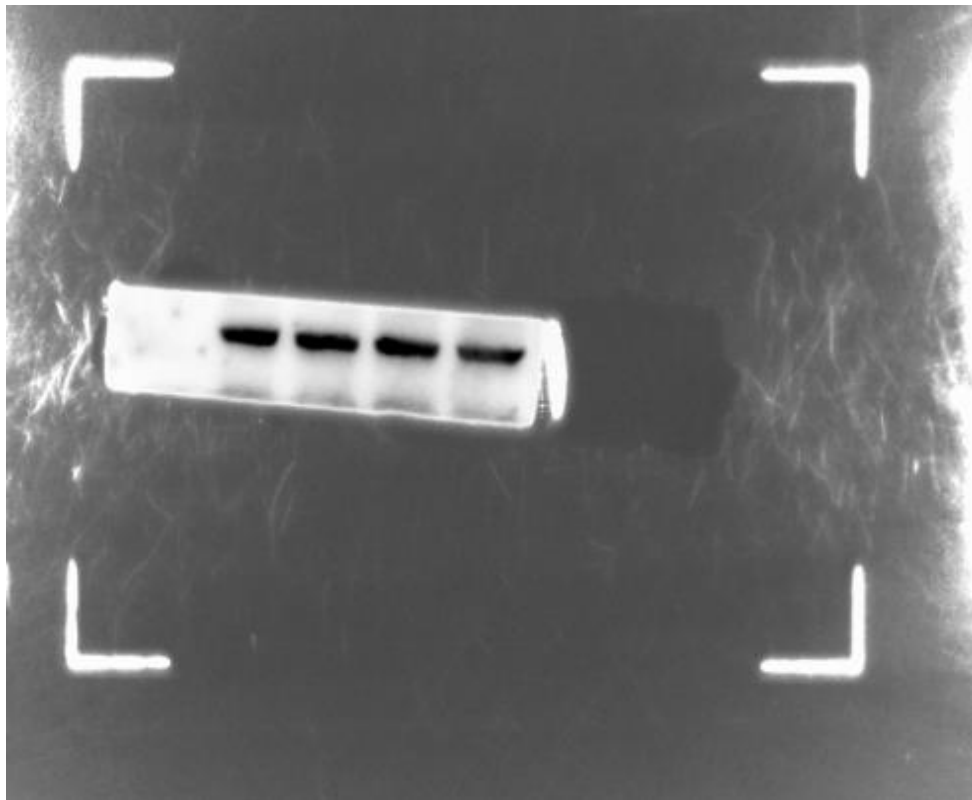

**CRABP2**

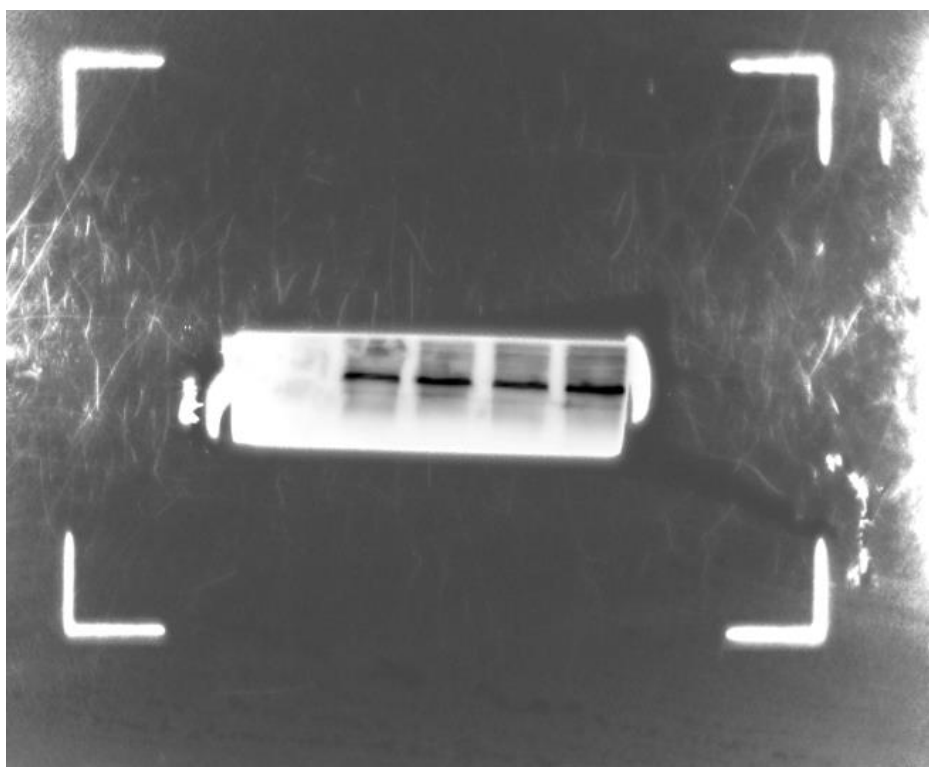

# CASPASE

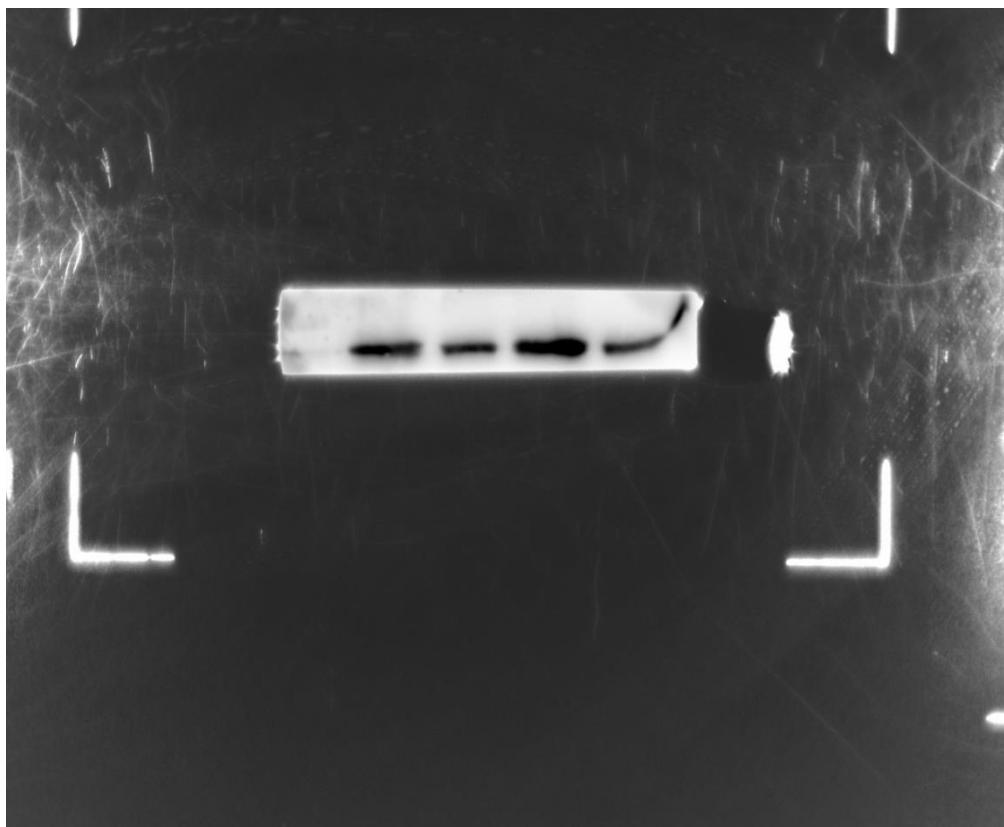

F4 j

ATM

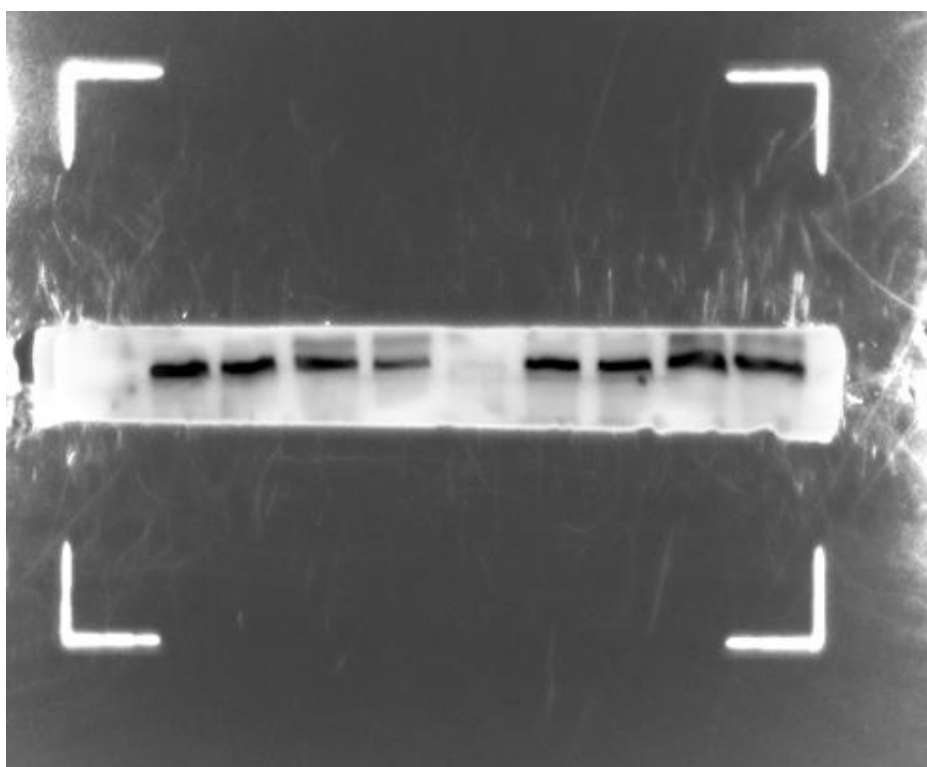

P-ATM

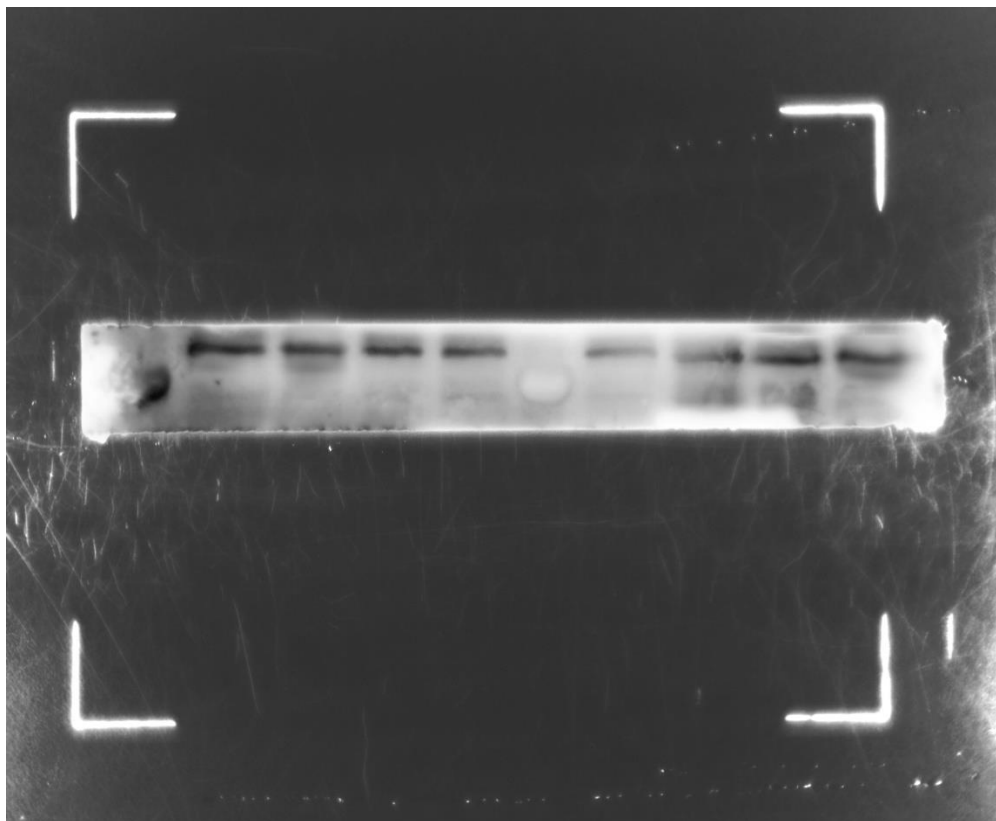

ATR

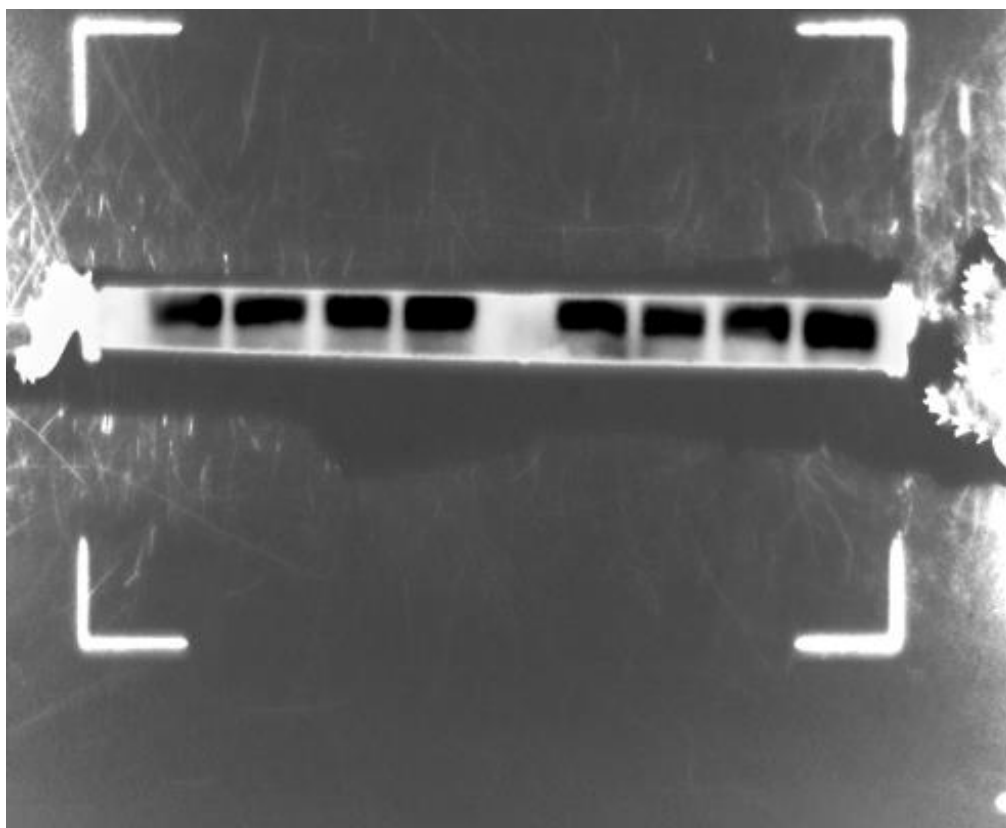

P-ATR

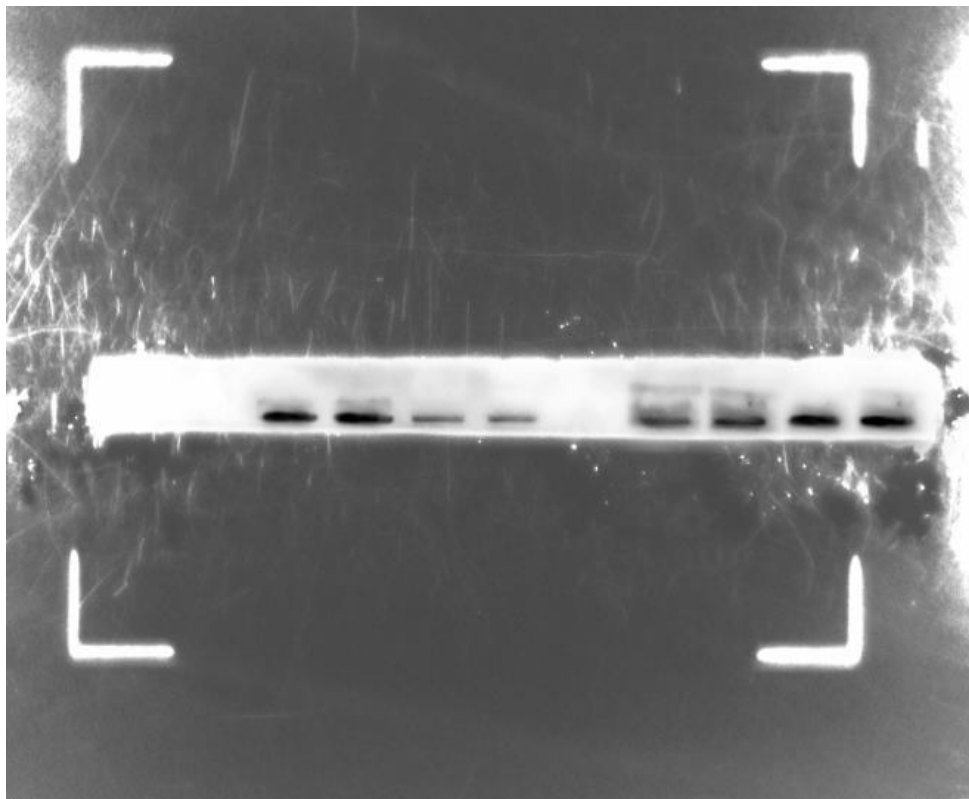

P53

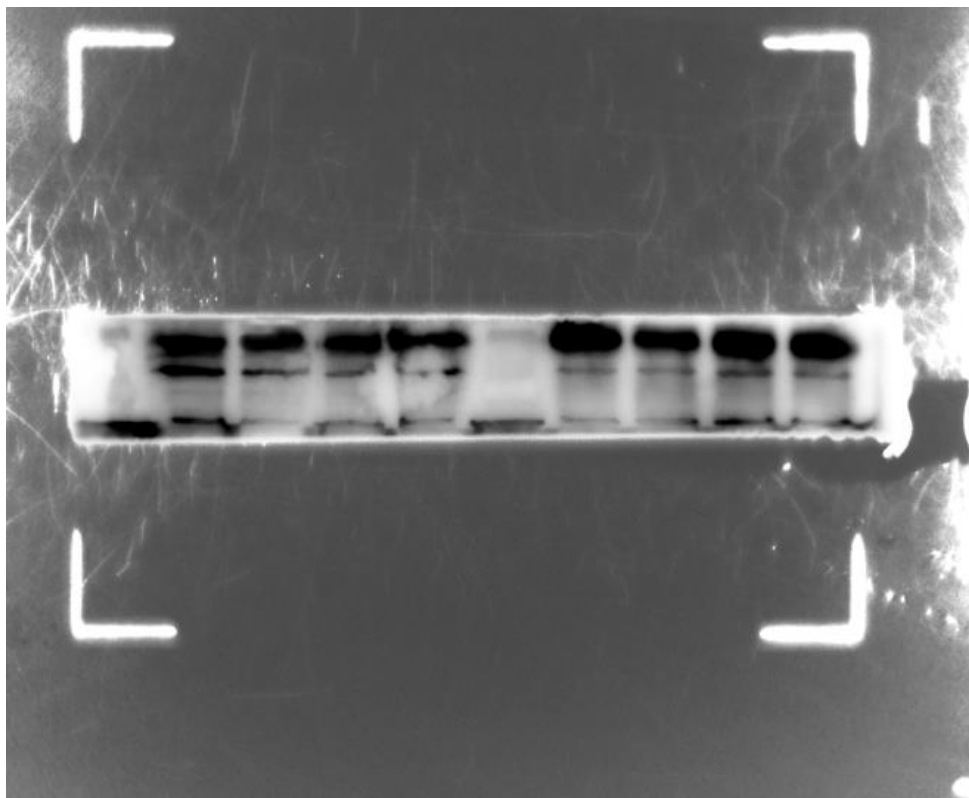

**P-P53**

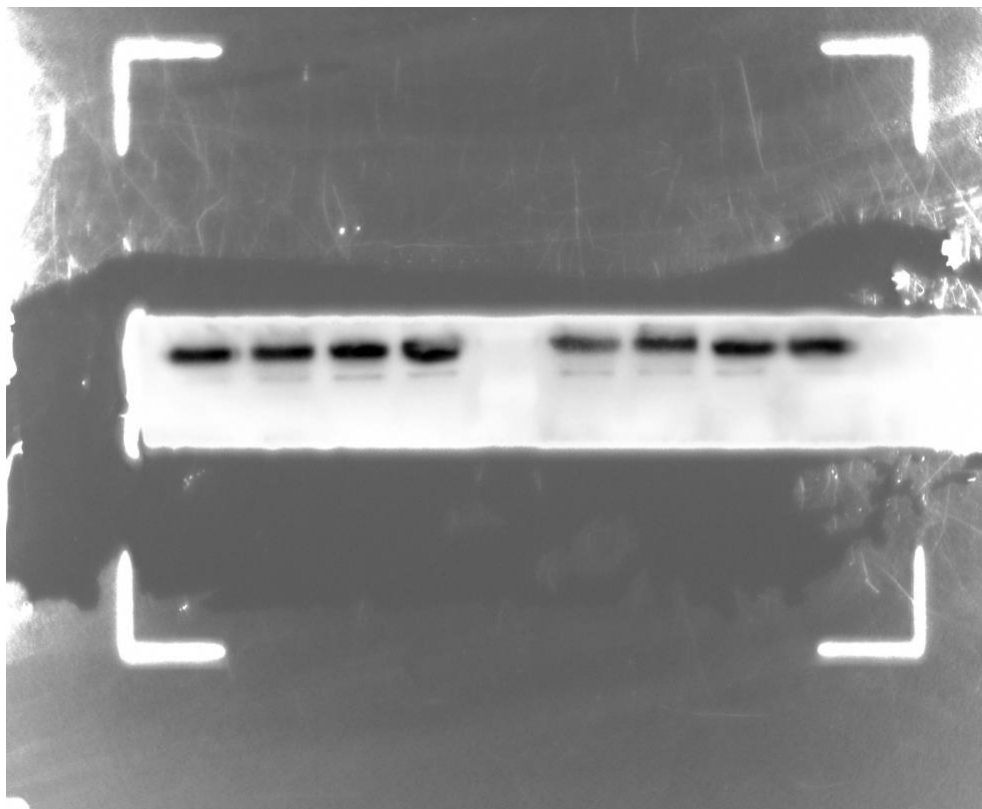

**BAX**

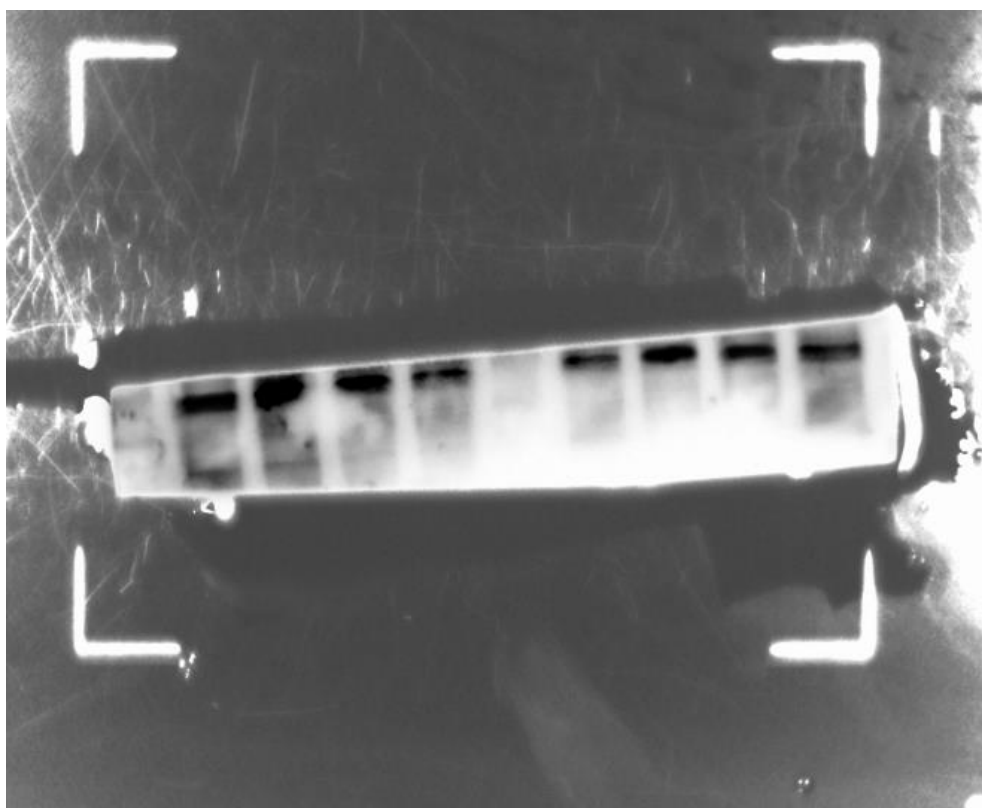



**GAPDH**

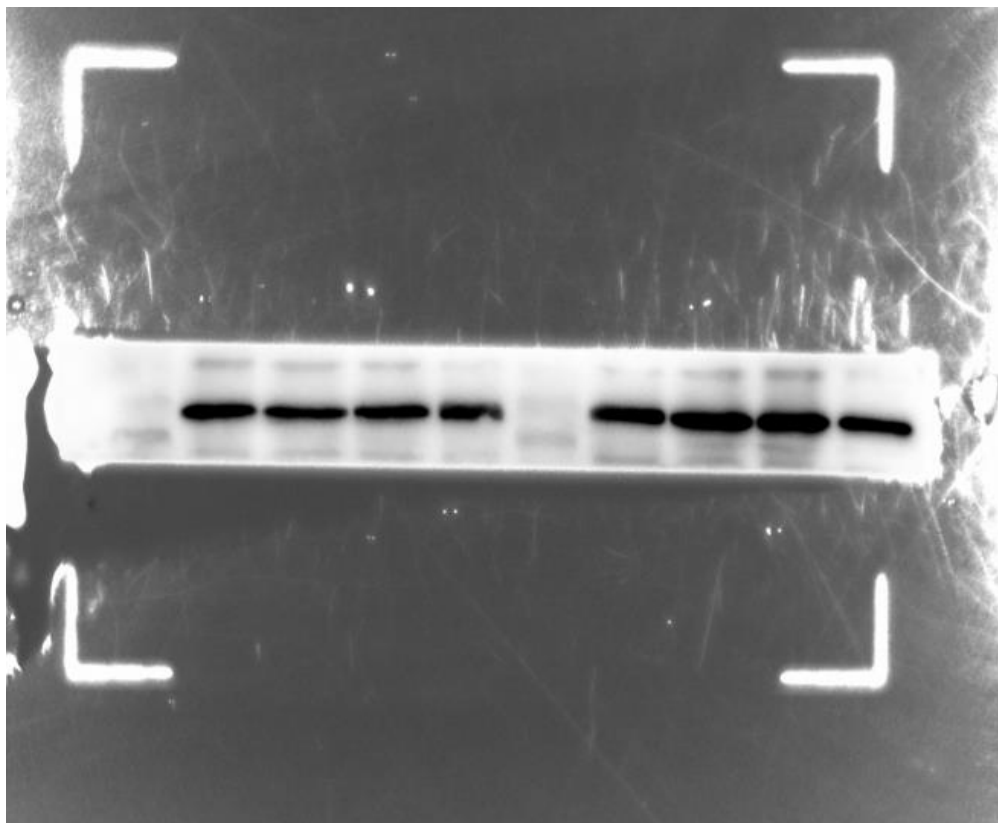

**F4 K**

**BAX**

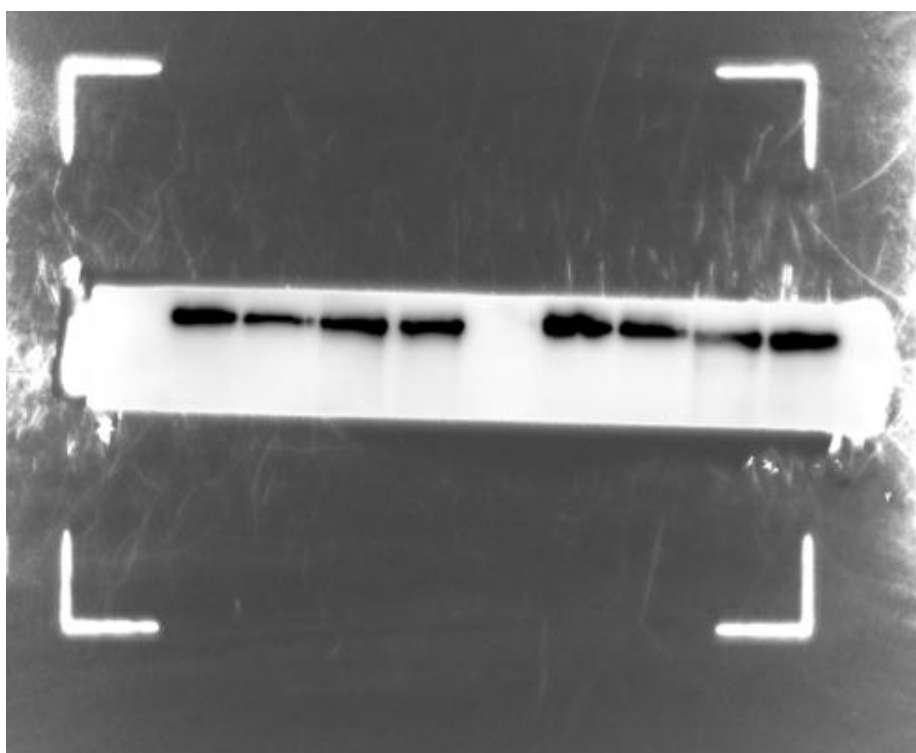

**TOMM40**

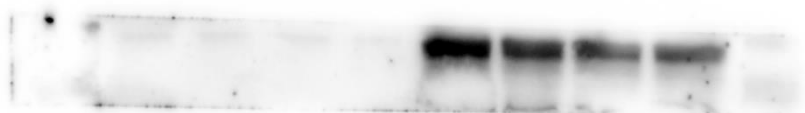

**TUBULIN**

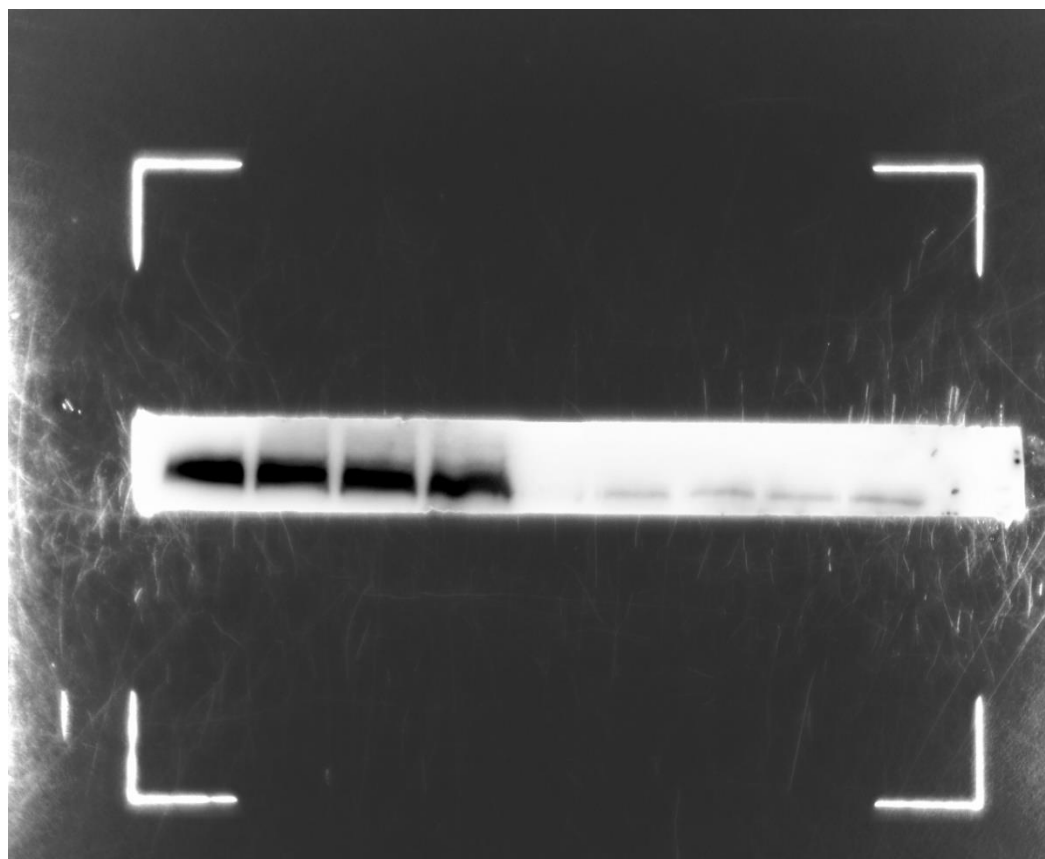

F4 L

BAX

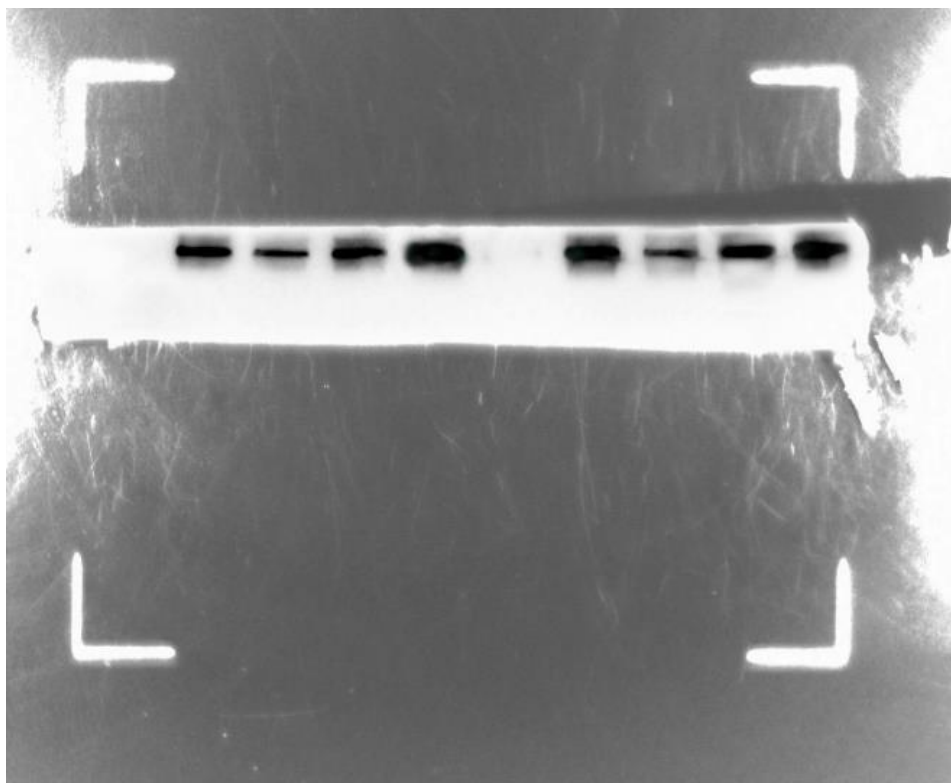

TOMM40

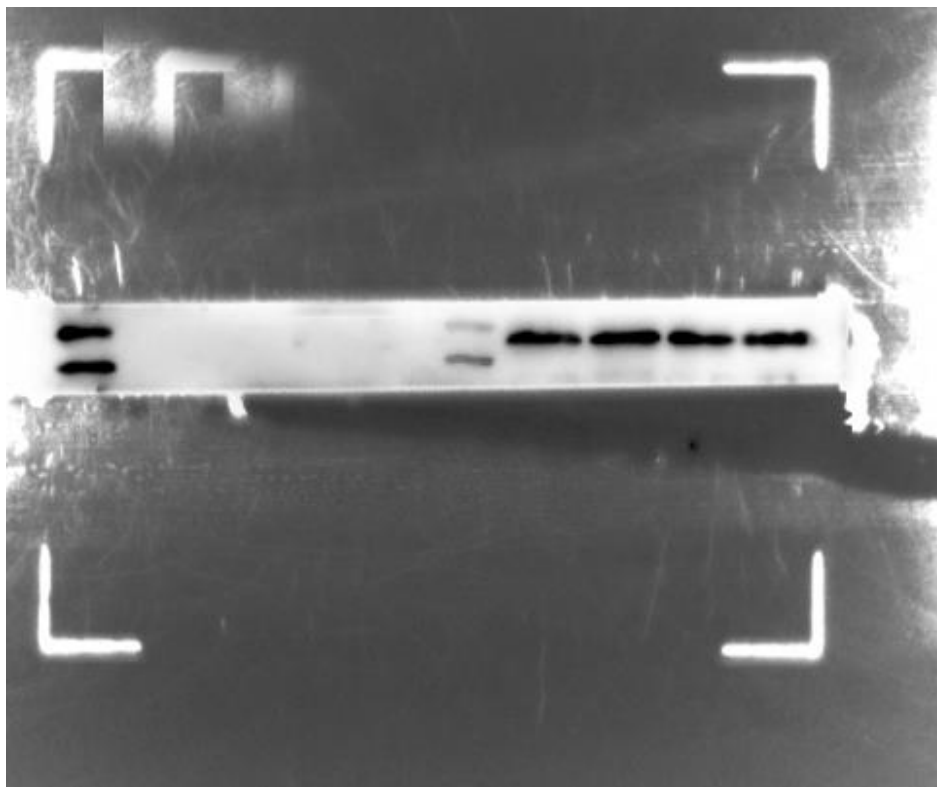

**GAPDH**

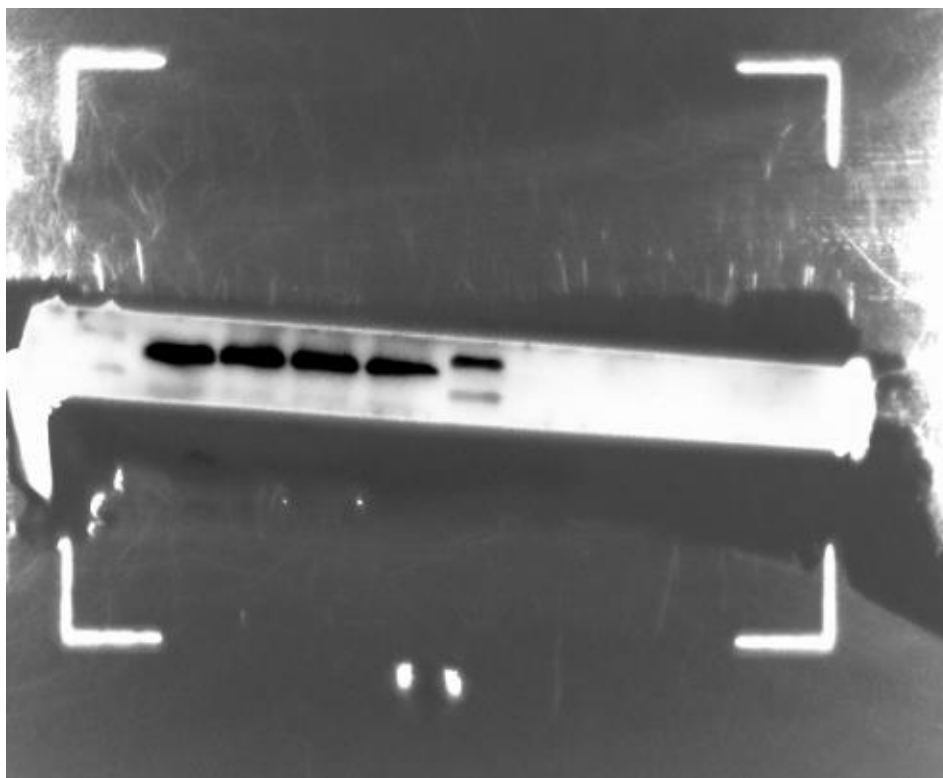

**F5 C**

**Bax**

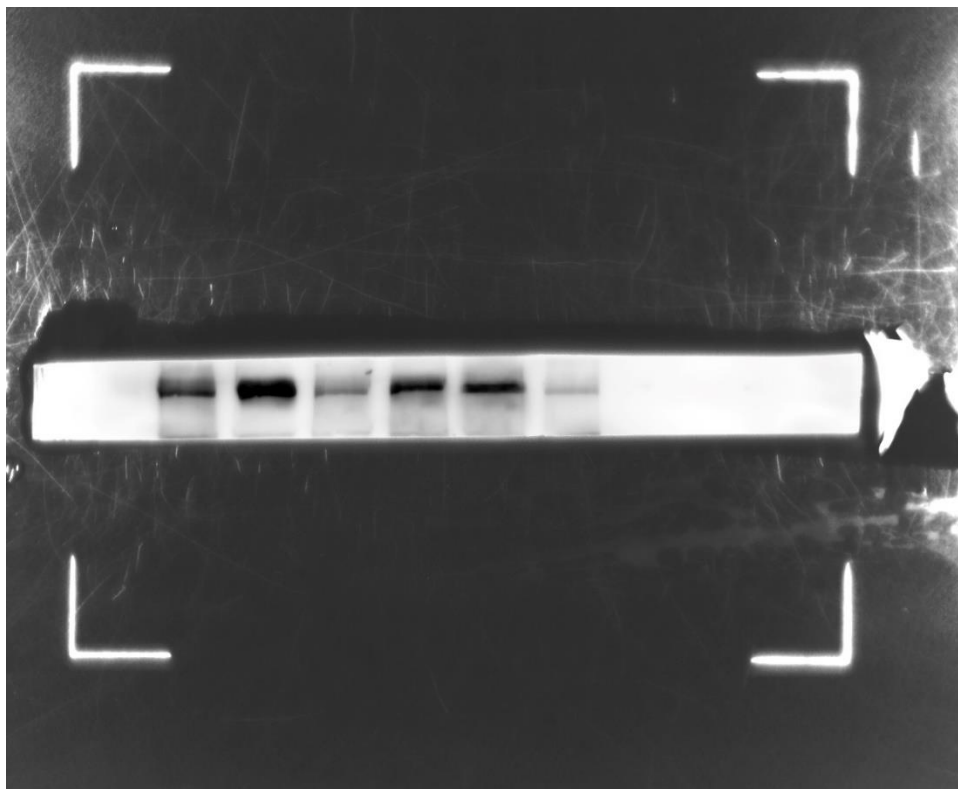

## Caspase3

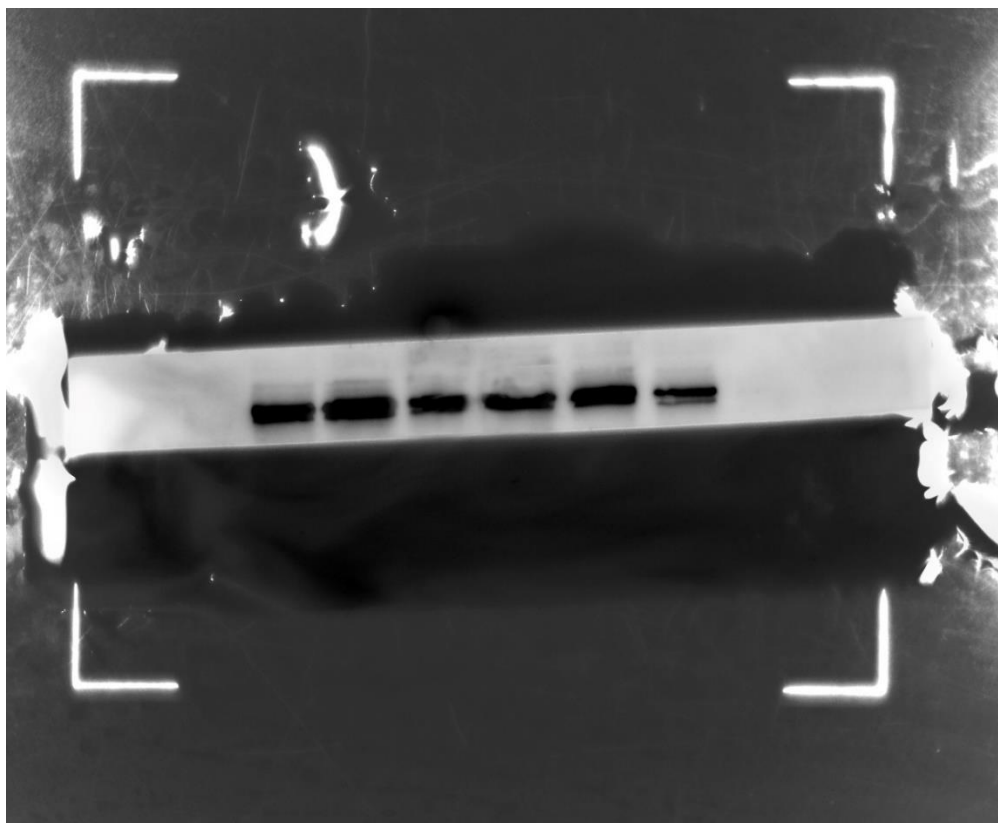

## CRABP2

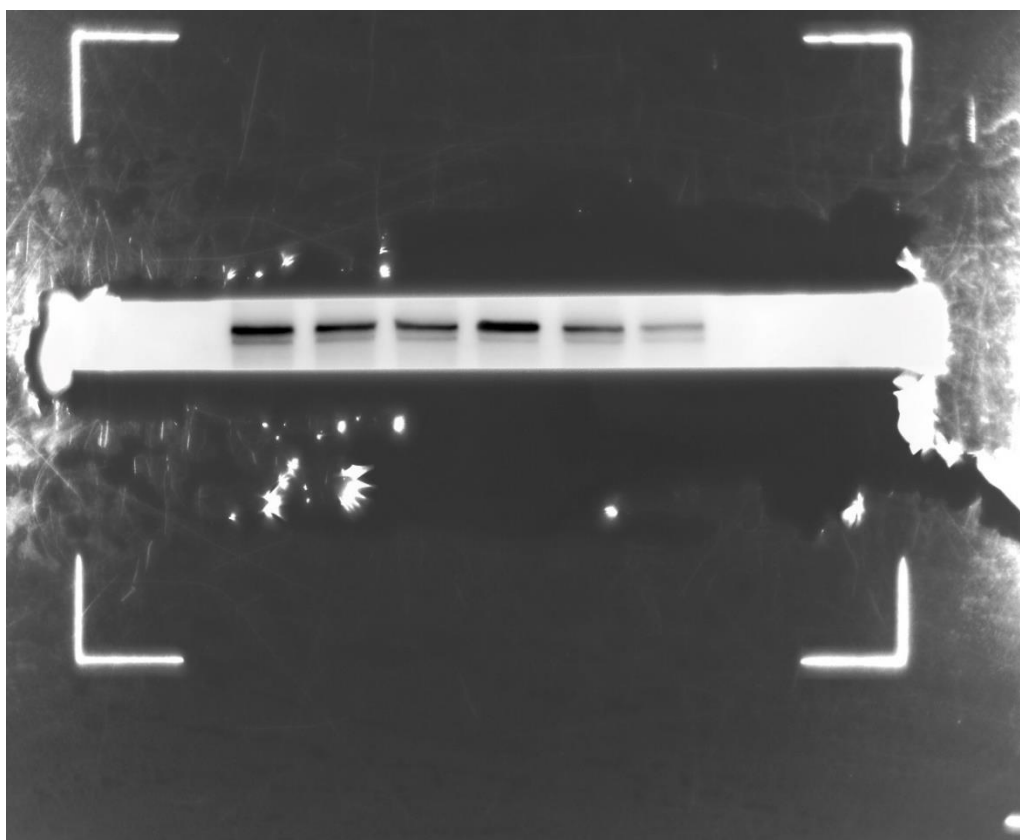

**GAPDH**

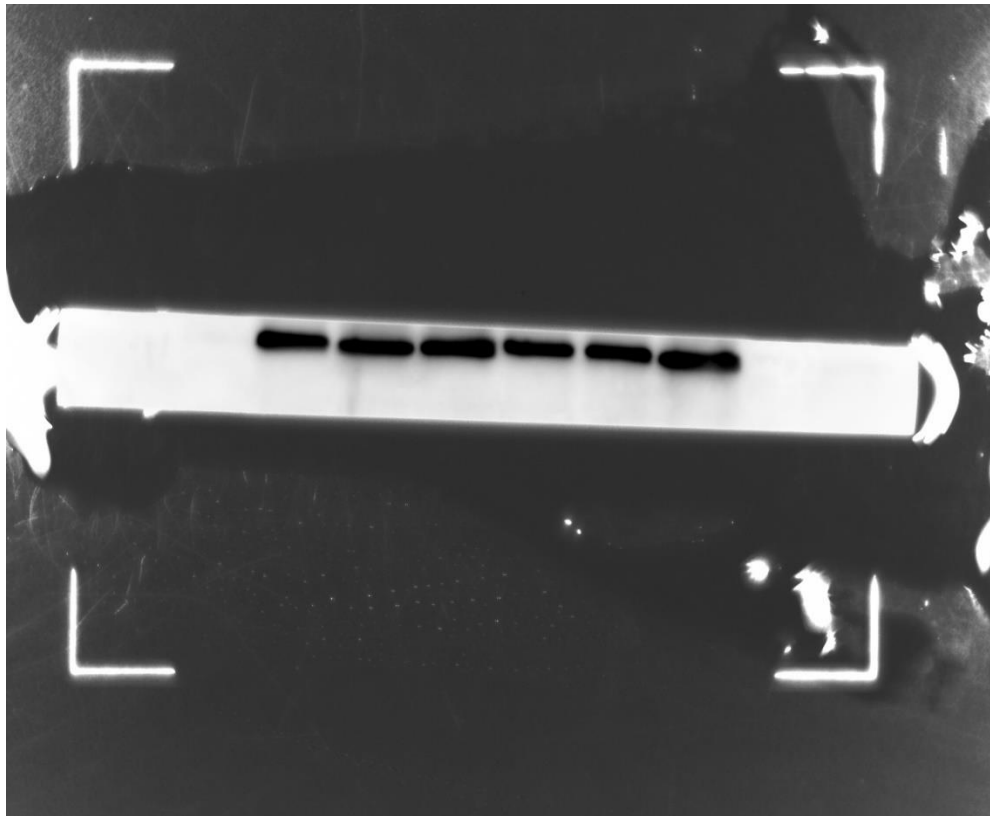

**F5 H**

**BAX**

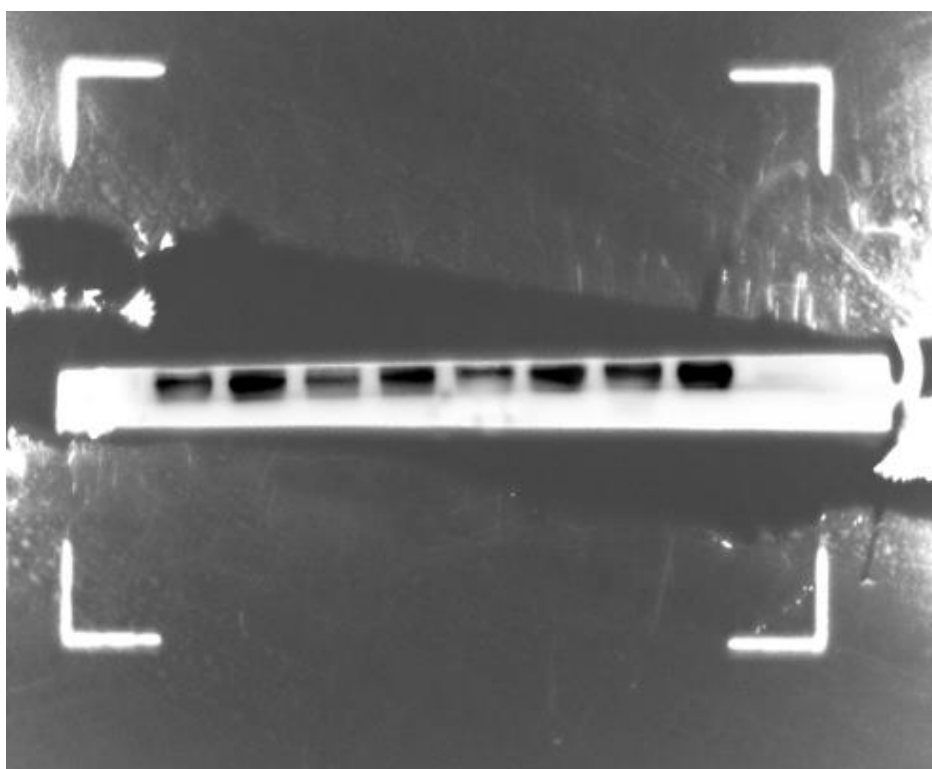

**GAPDH**

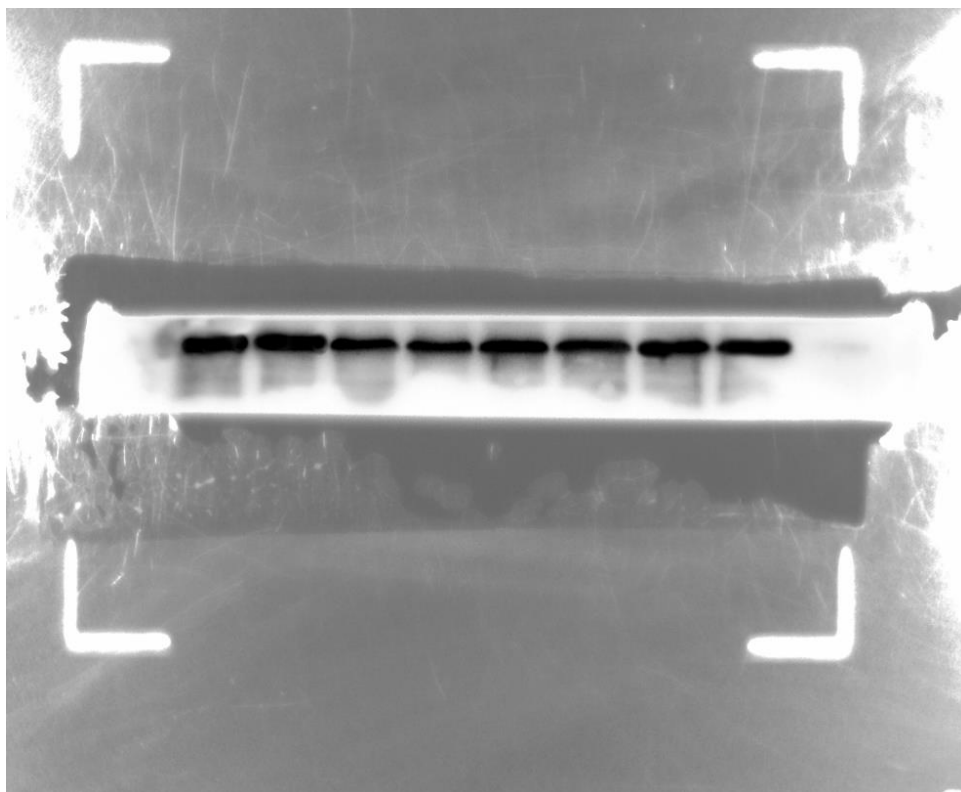

**CRABP2**

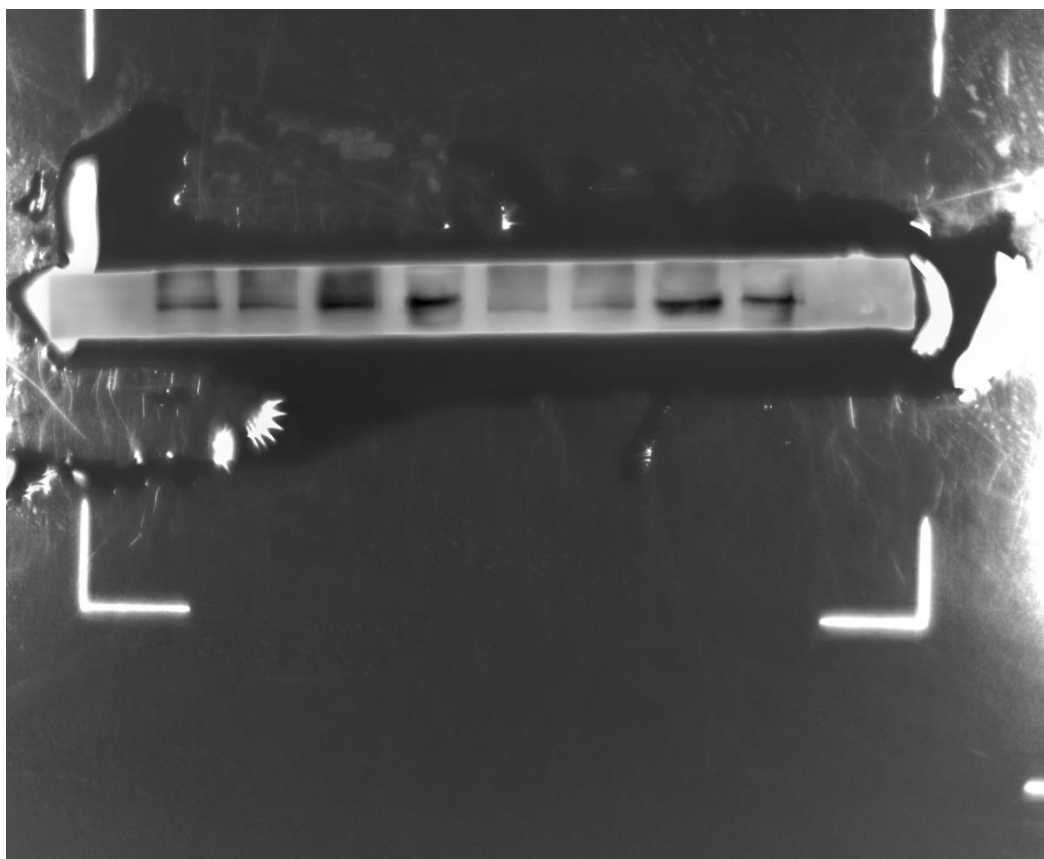

F6 D

TET1

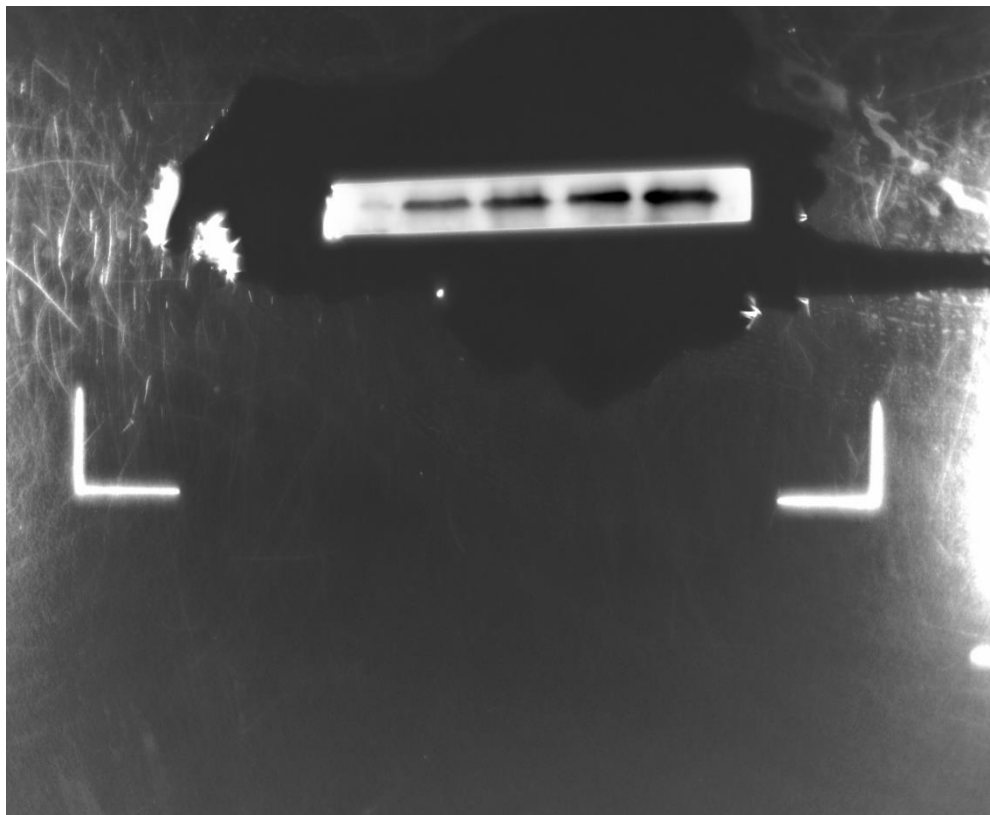

GAPDH

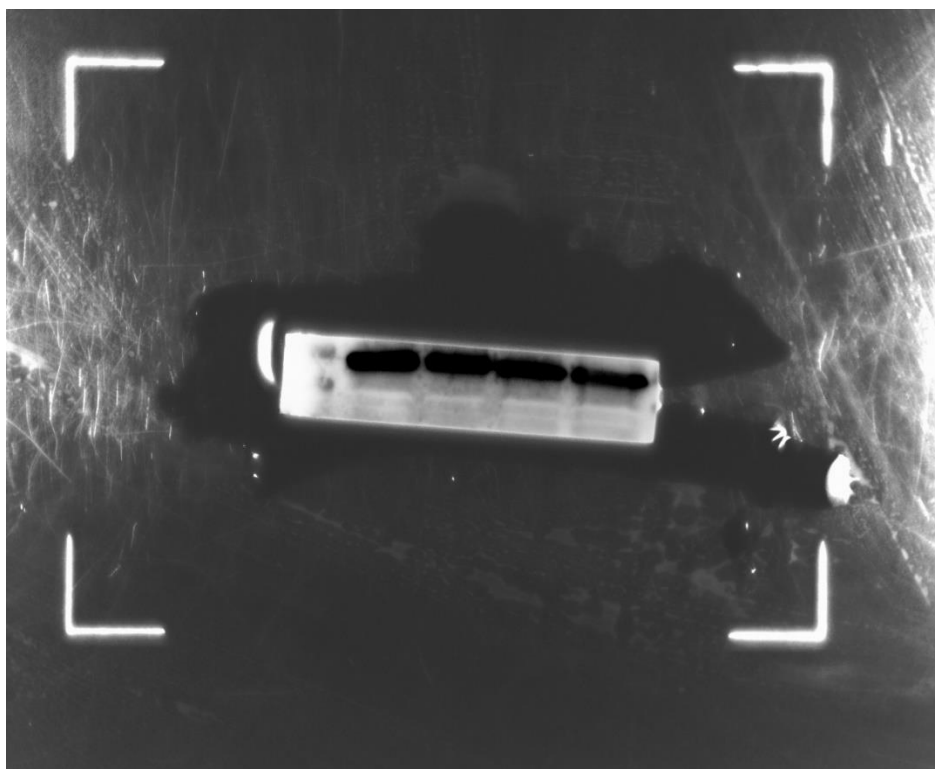



**DNMT3A**

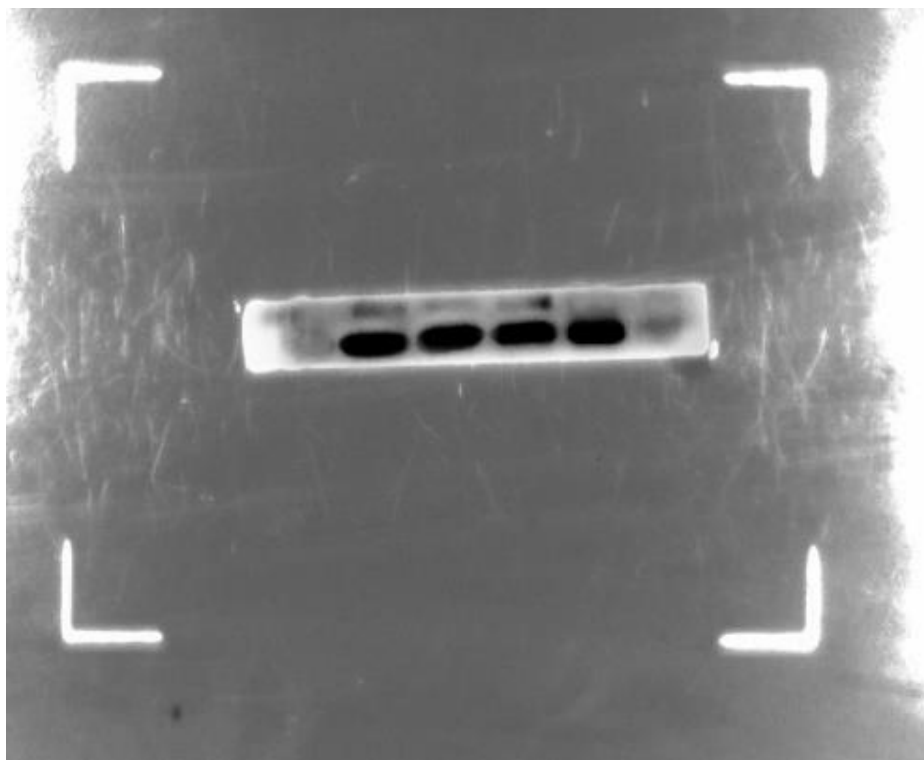

**DNMT3B**

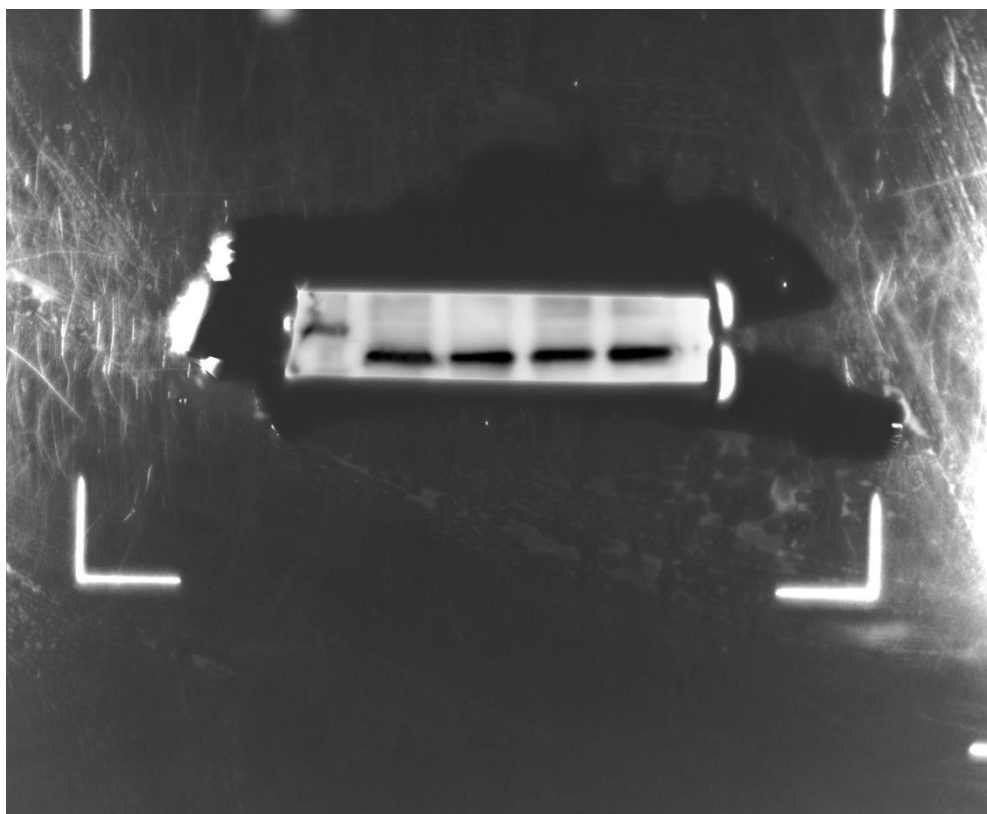

F6J

TET1

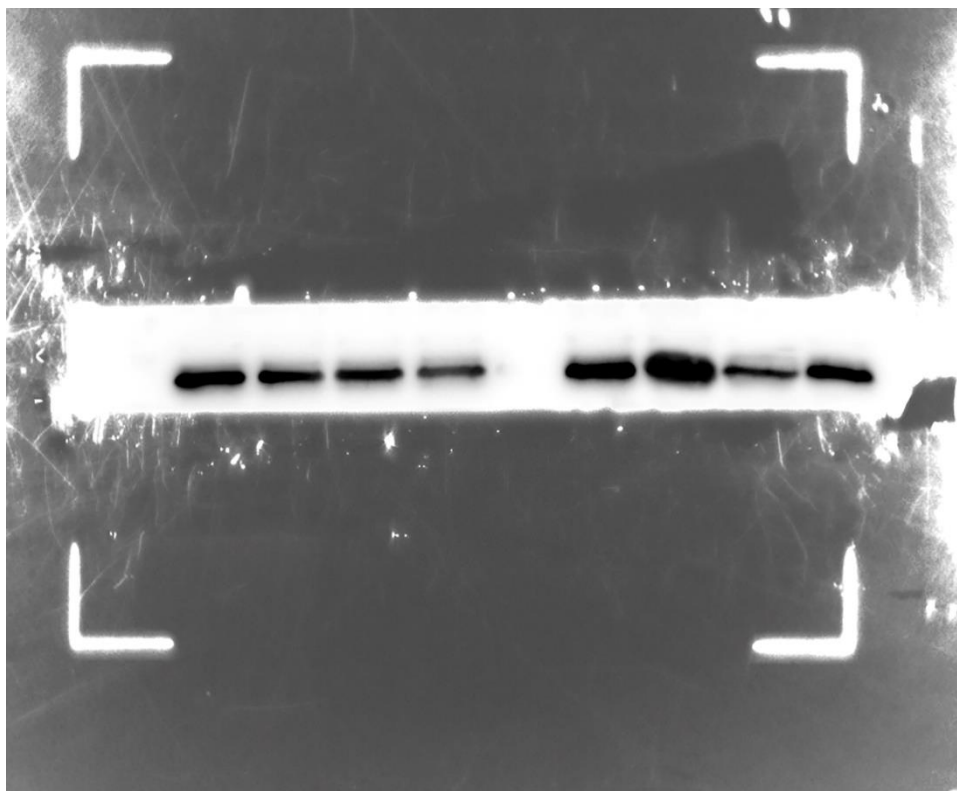

GAPDH

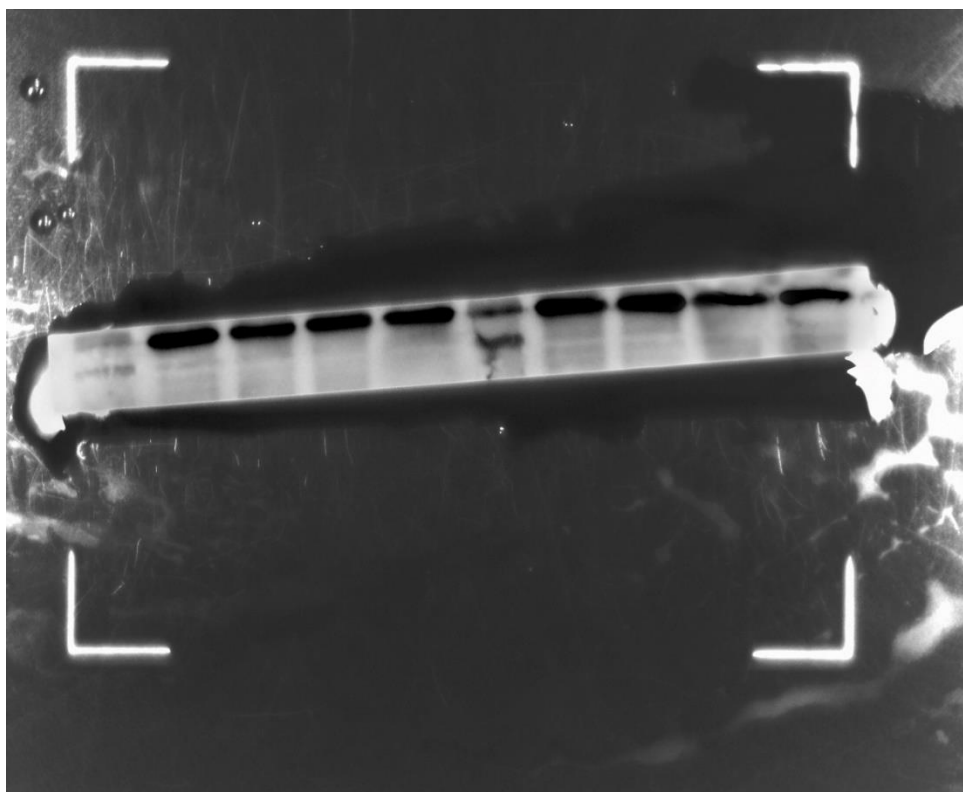

**CRABP2**

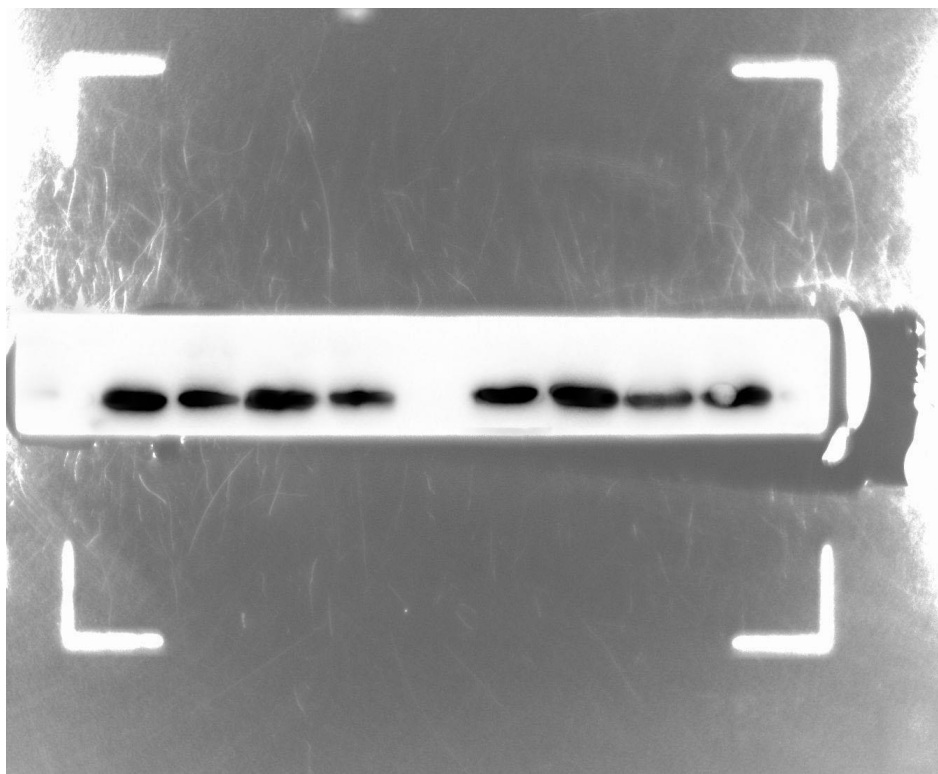

**F7 E**

**GAPDH**

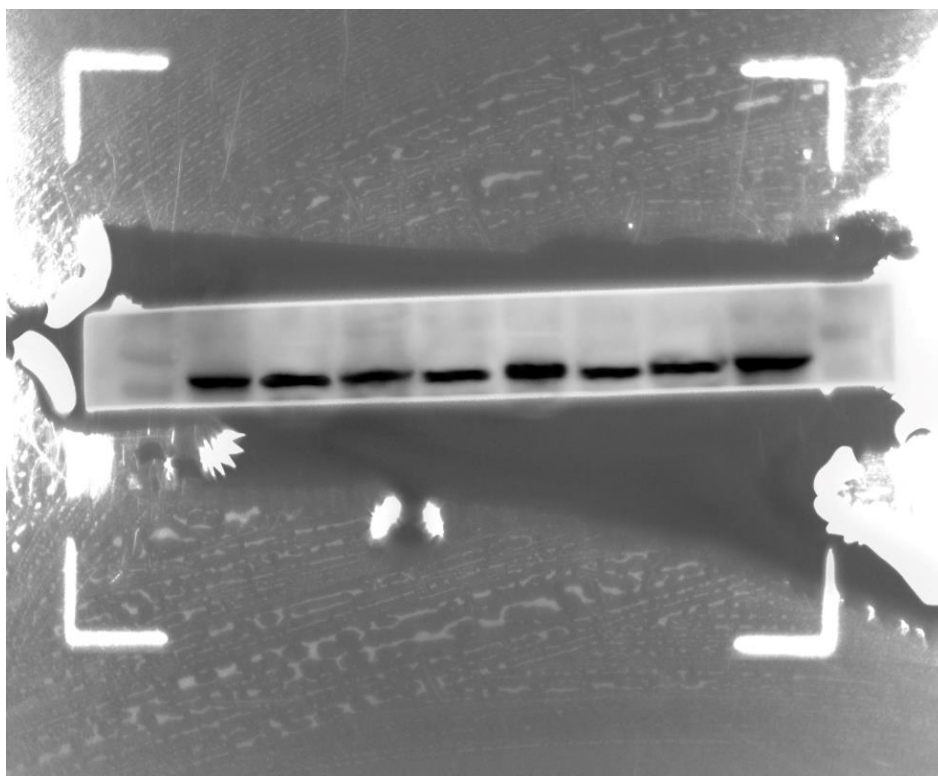

**CRABP2**

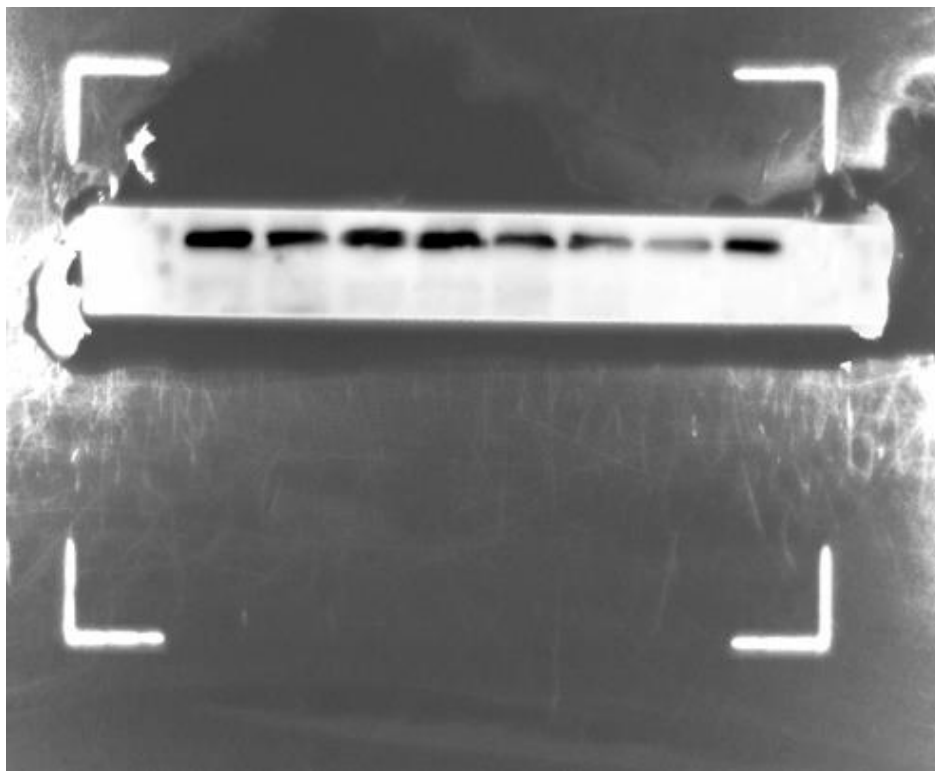

**BAX**

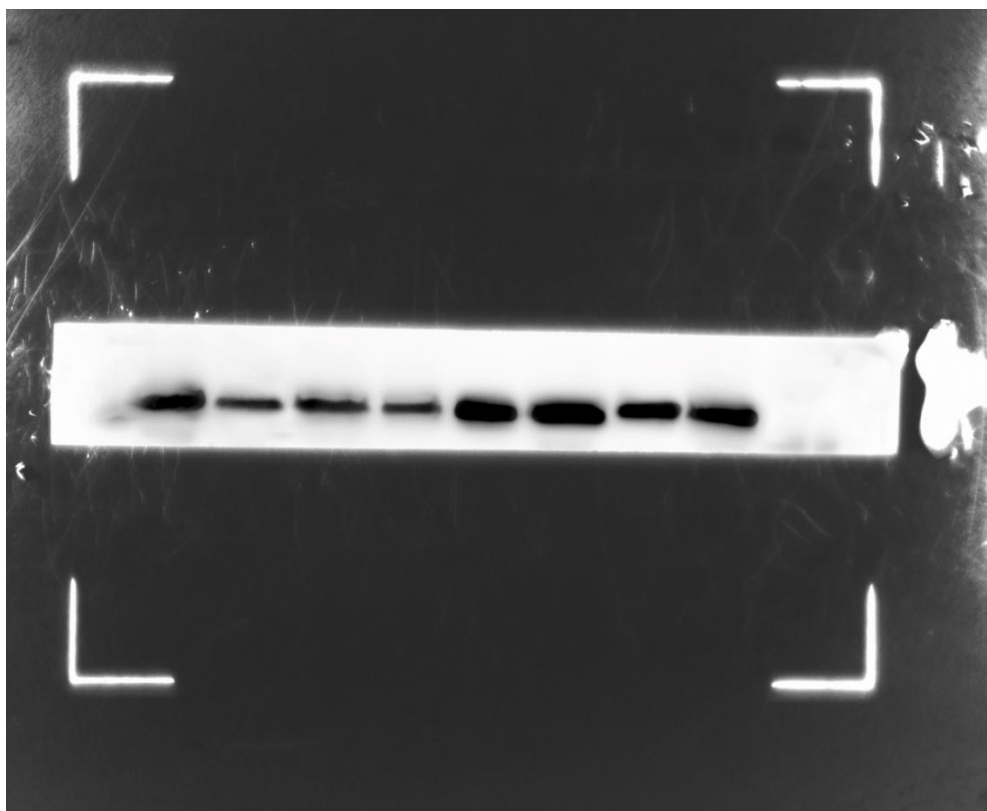

S7A

A

CRABP2

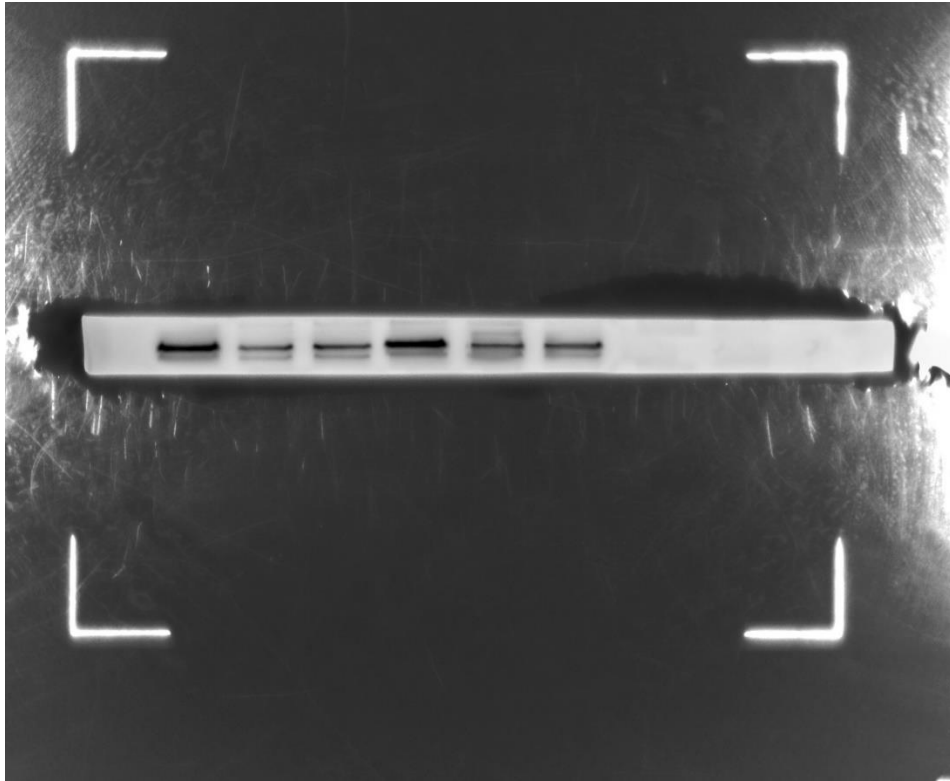

GAPDH

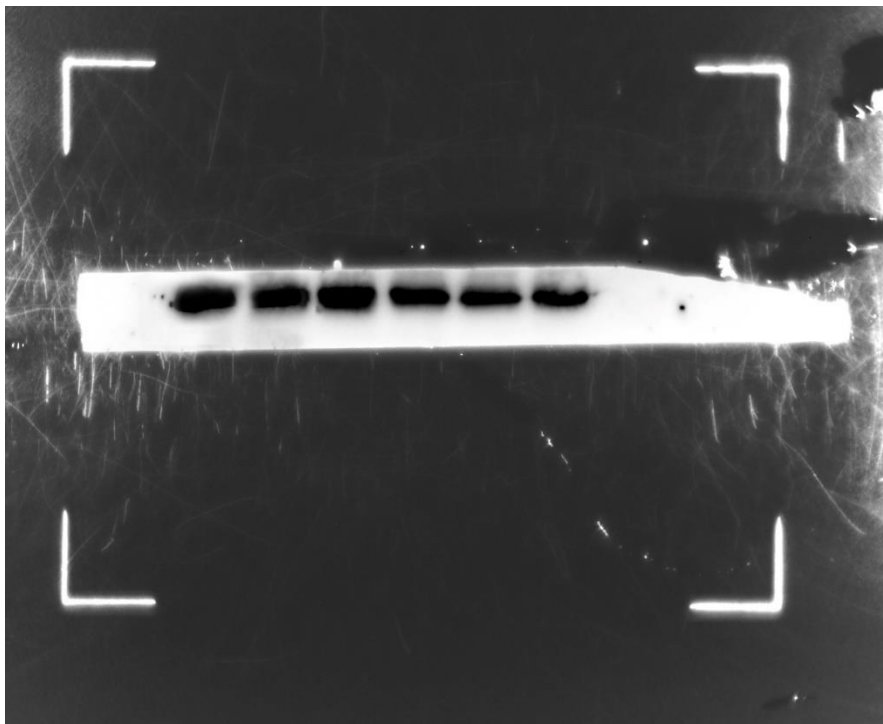

7B

BAX

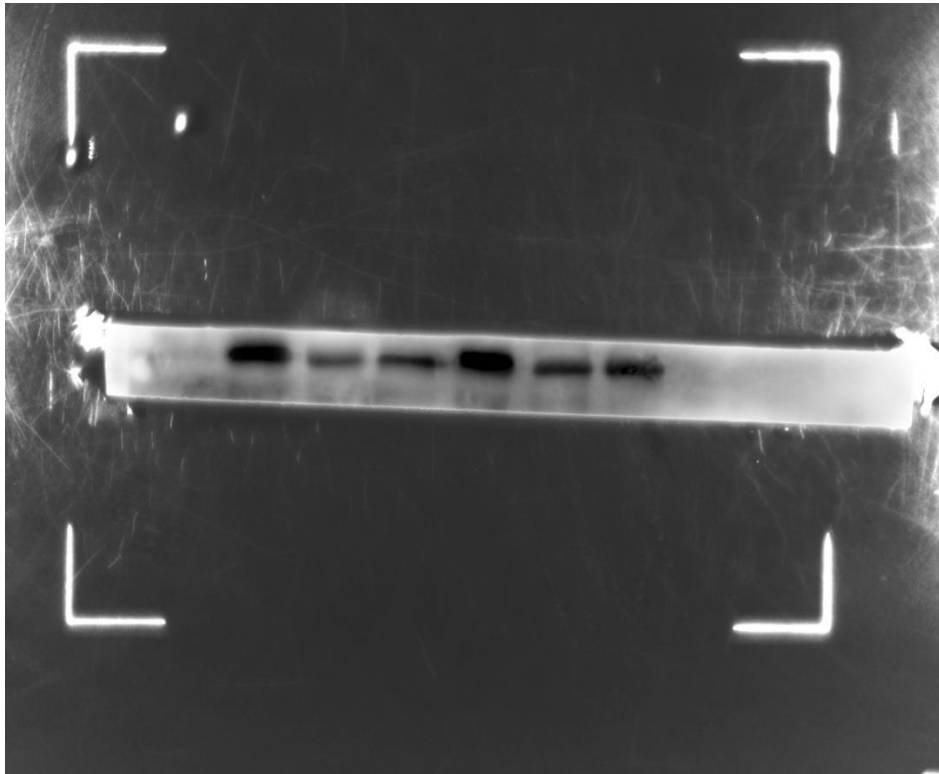

GAPDH

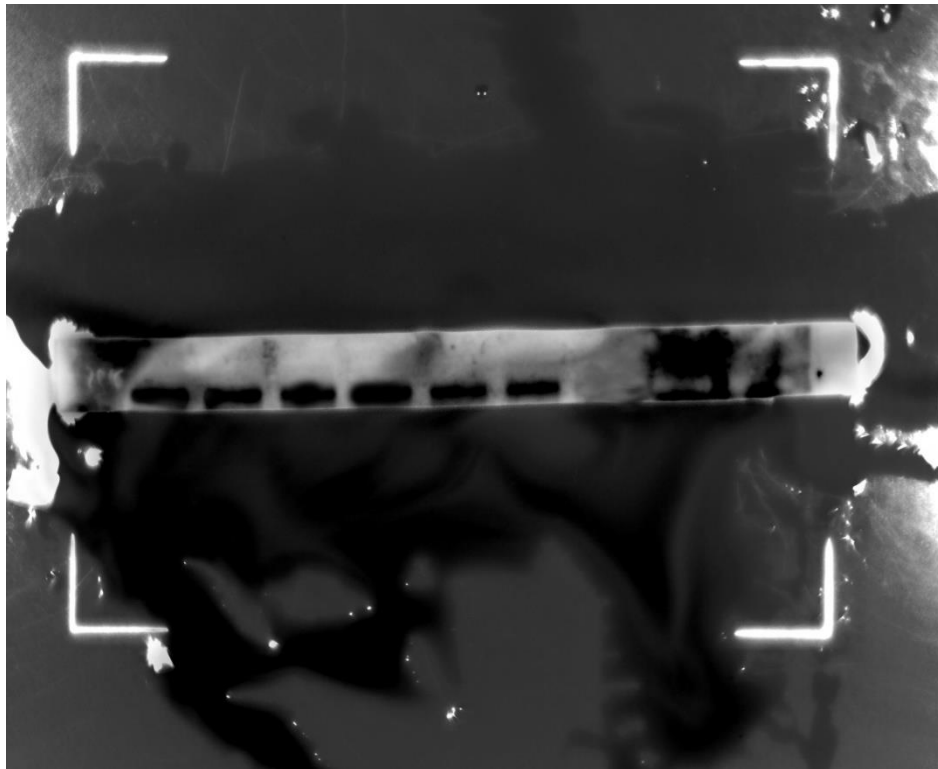

7C

PARKIN

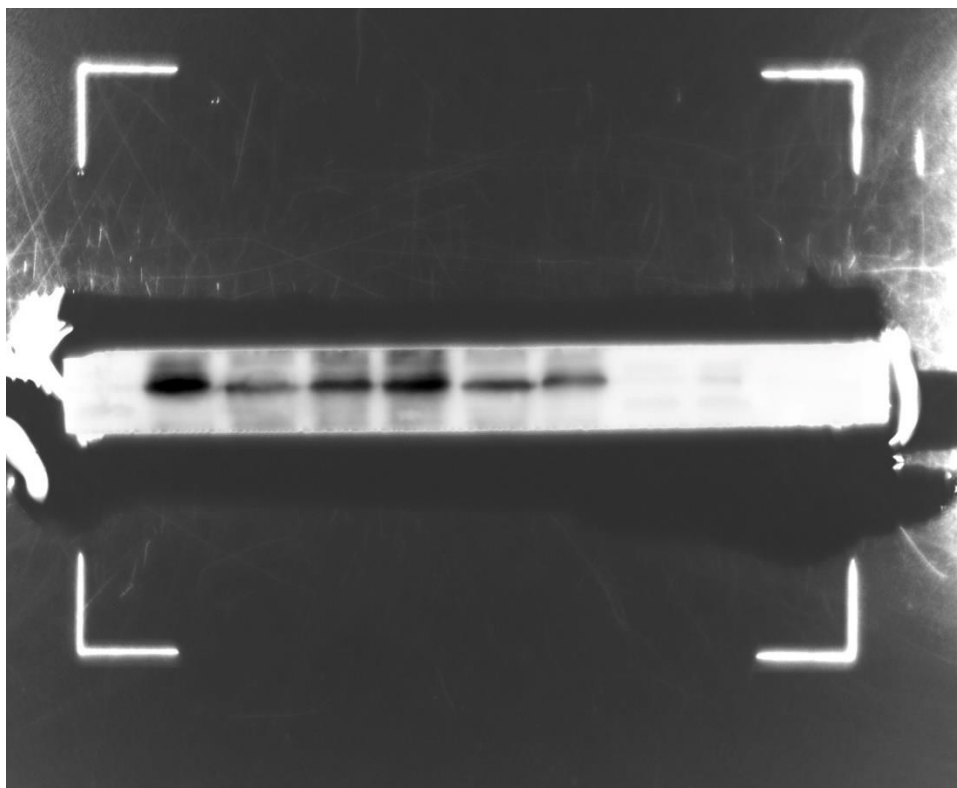

GAPDH

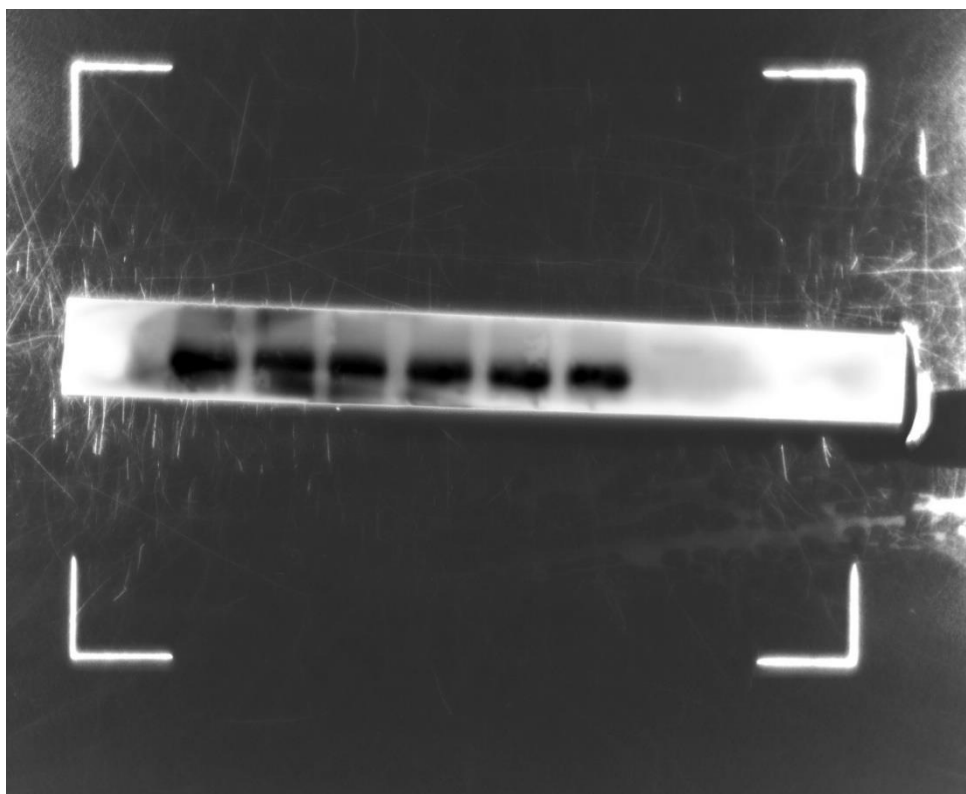



7D

TET1

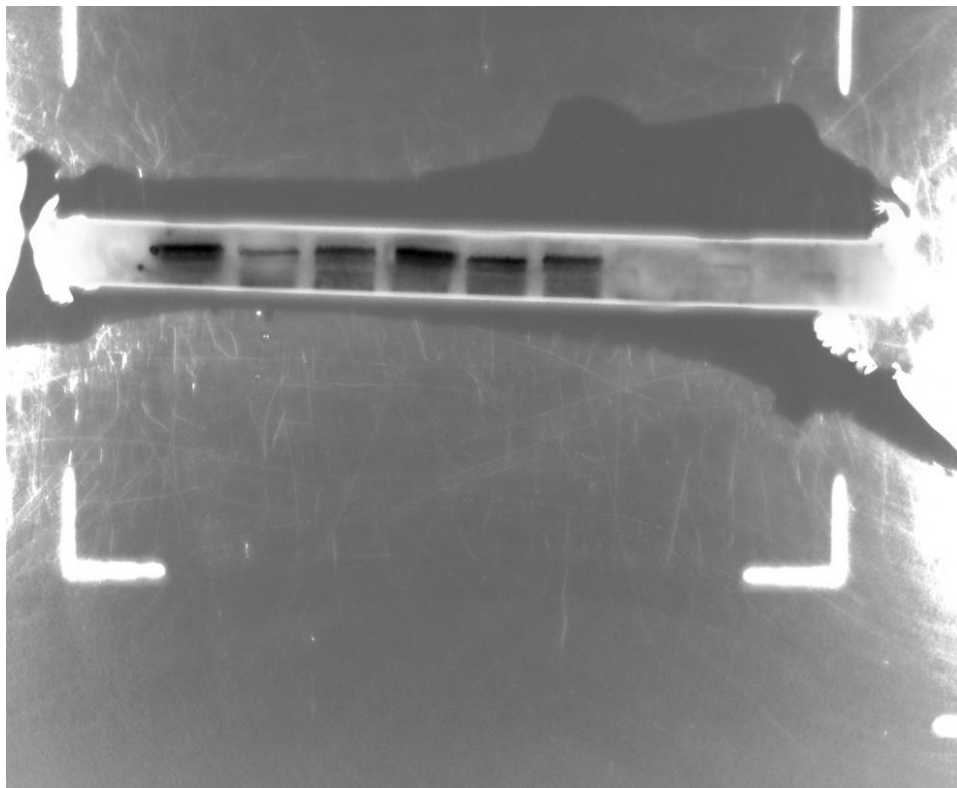

GAPDH

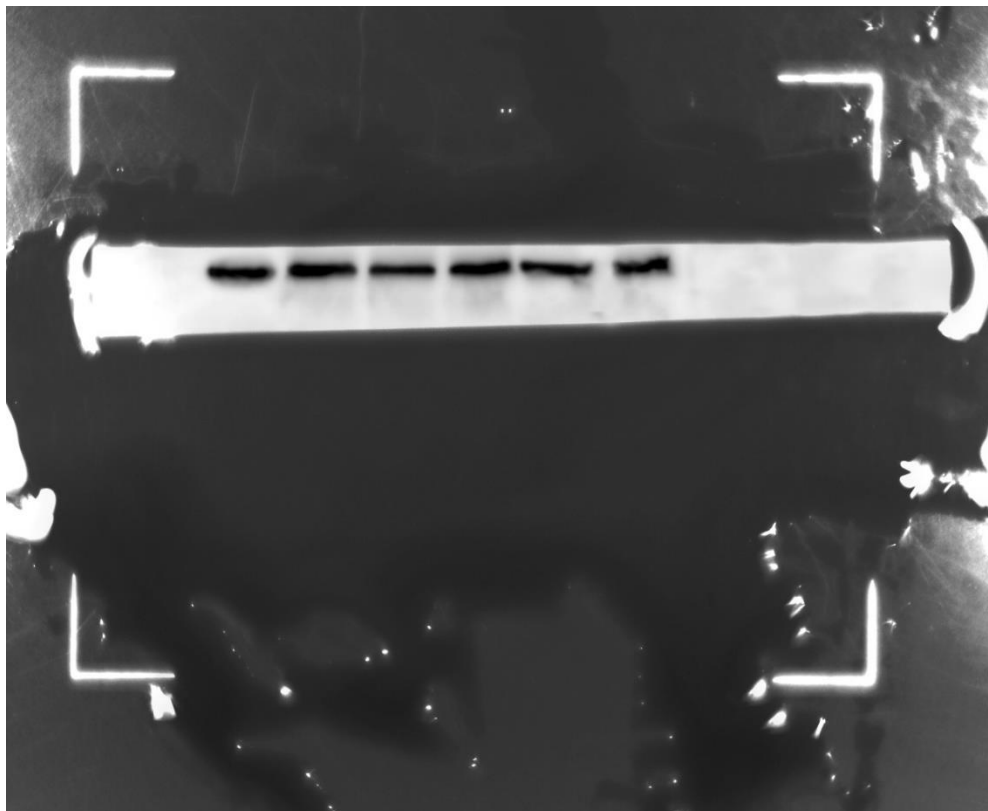



S7E

GAPDH

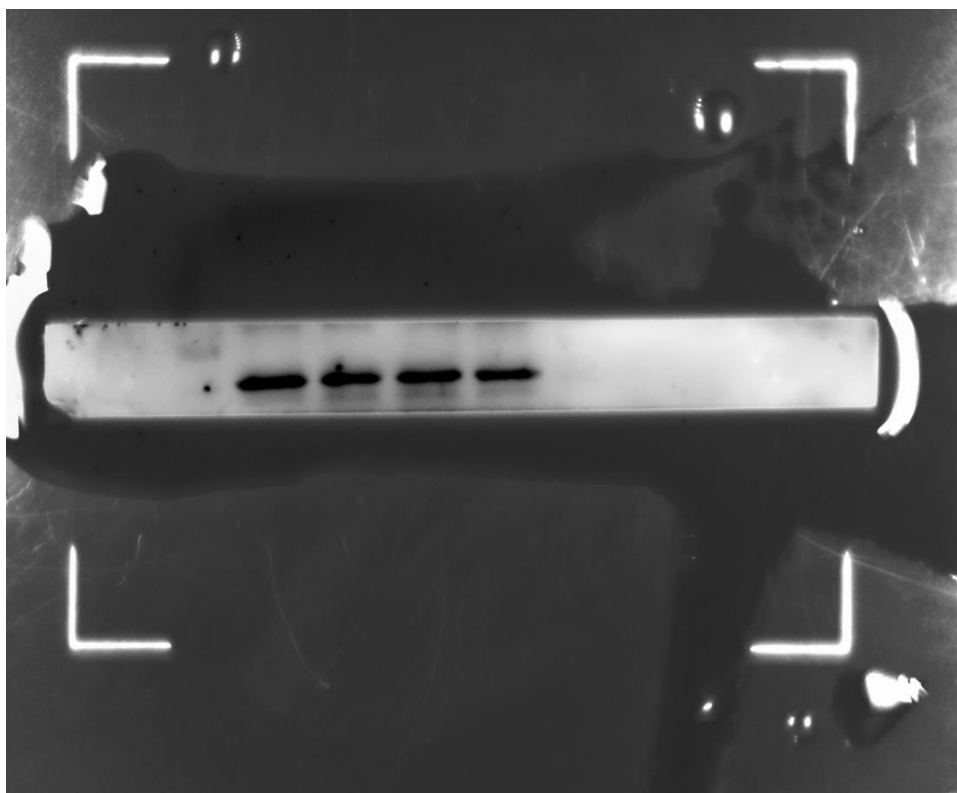

CRABP2

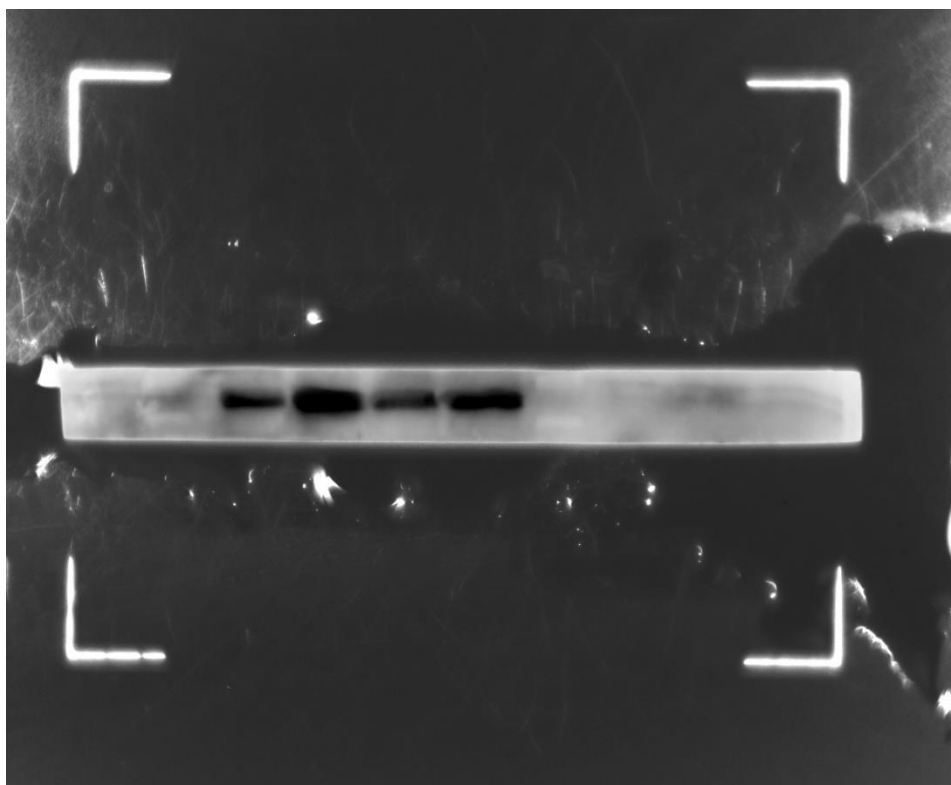

S7 F

GAPDH

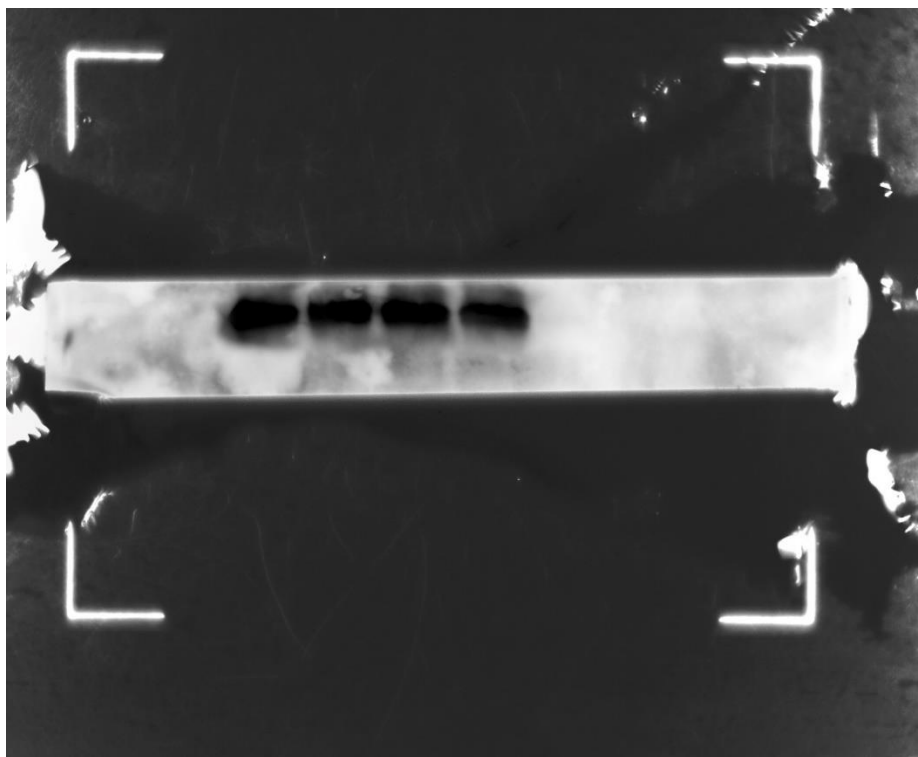

TET1

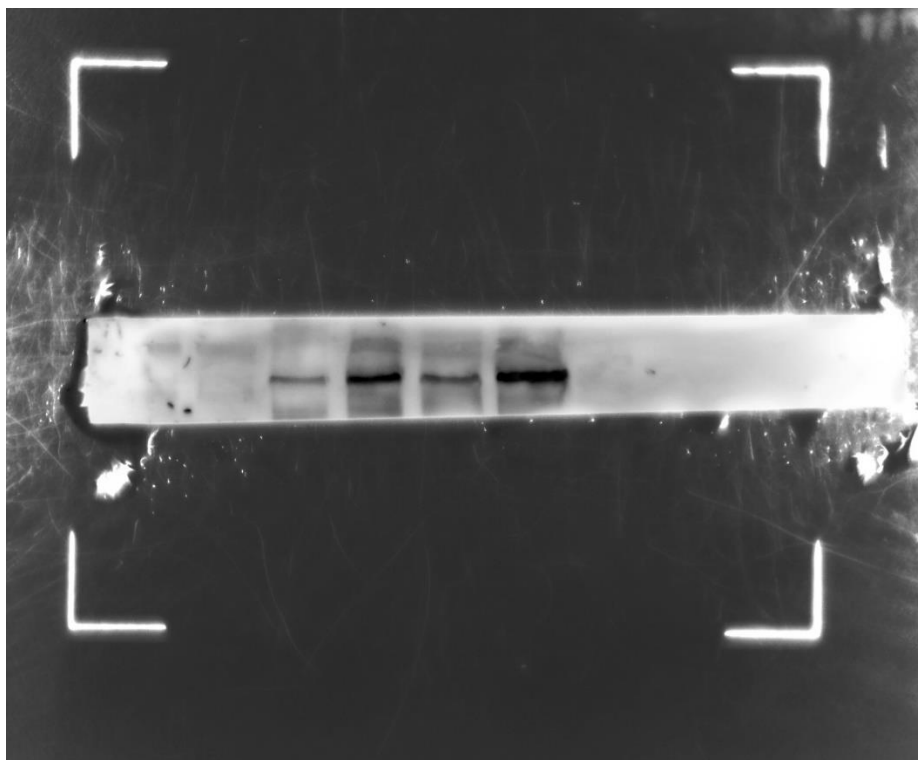

S5 A

BAX

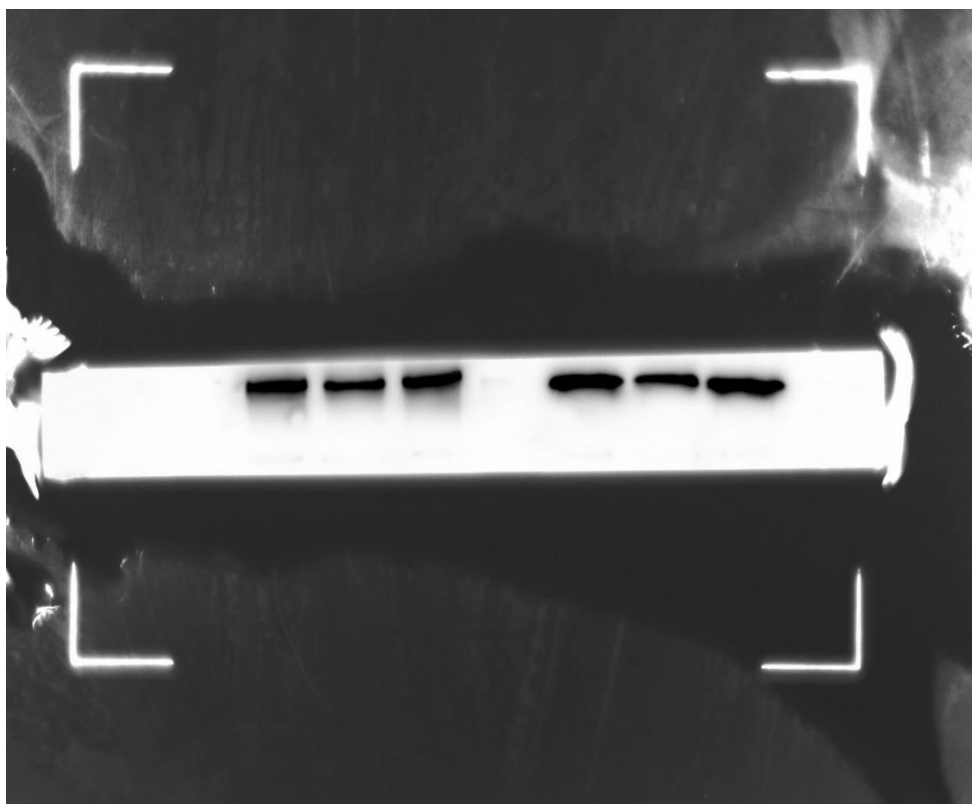

GAPDH

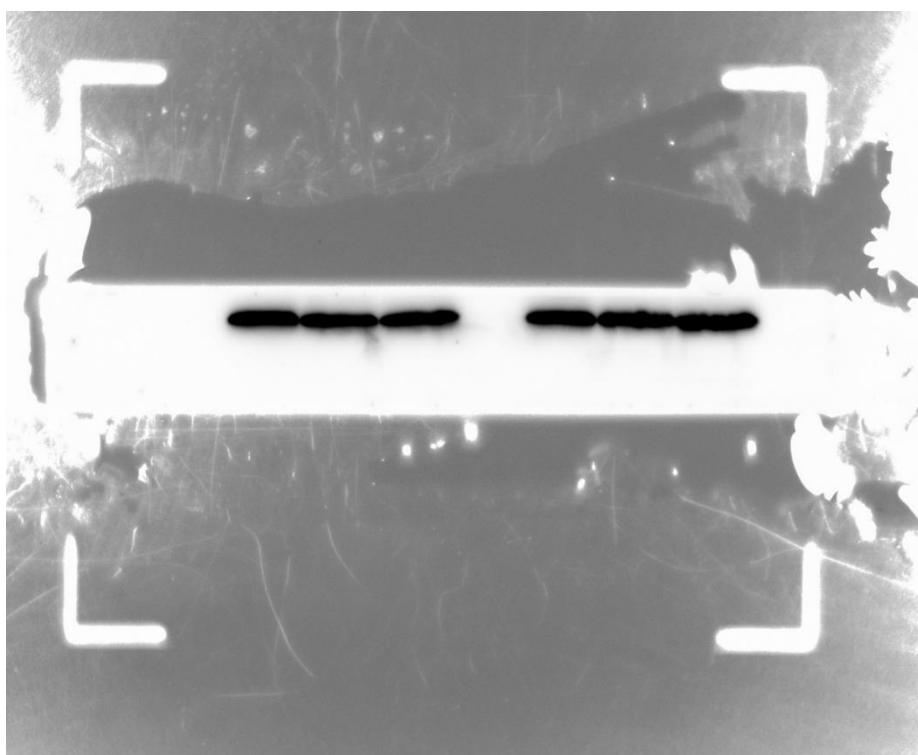

## CRABP2

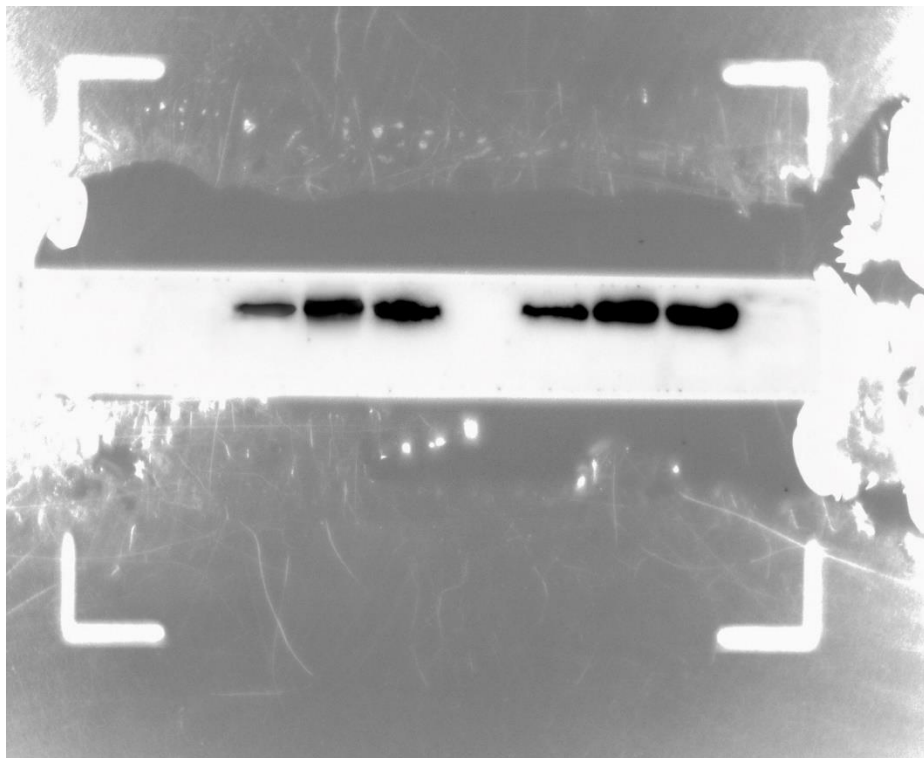

## PARKIN

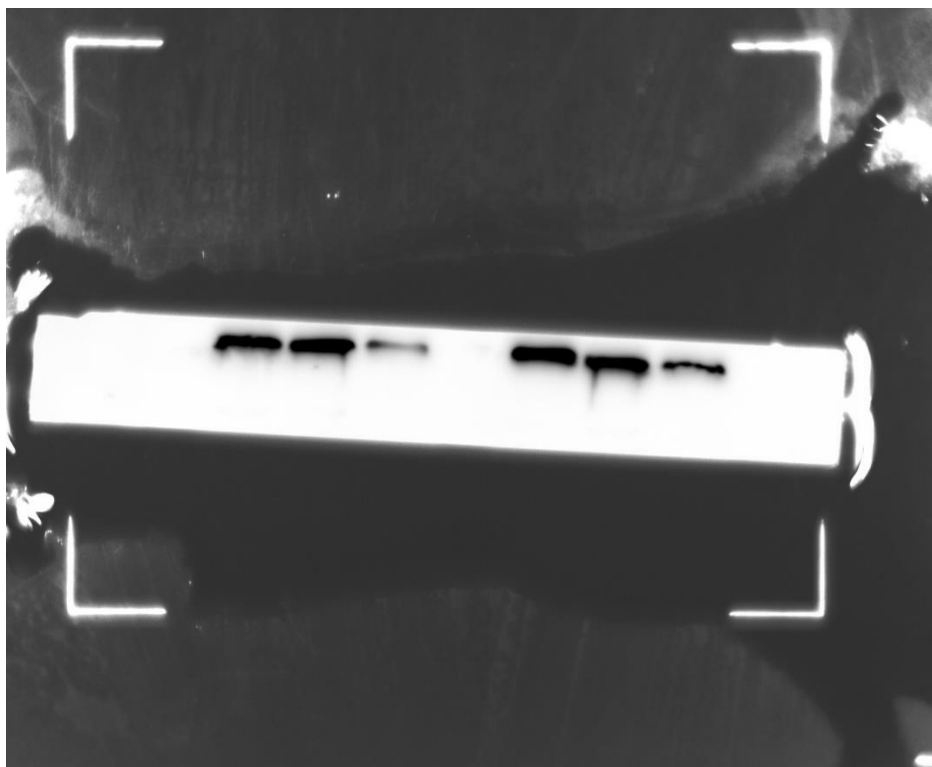

# CASPASE-3

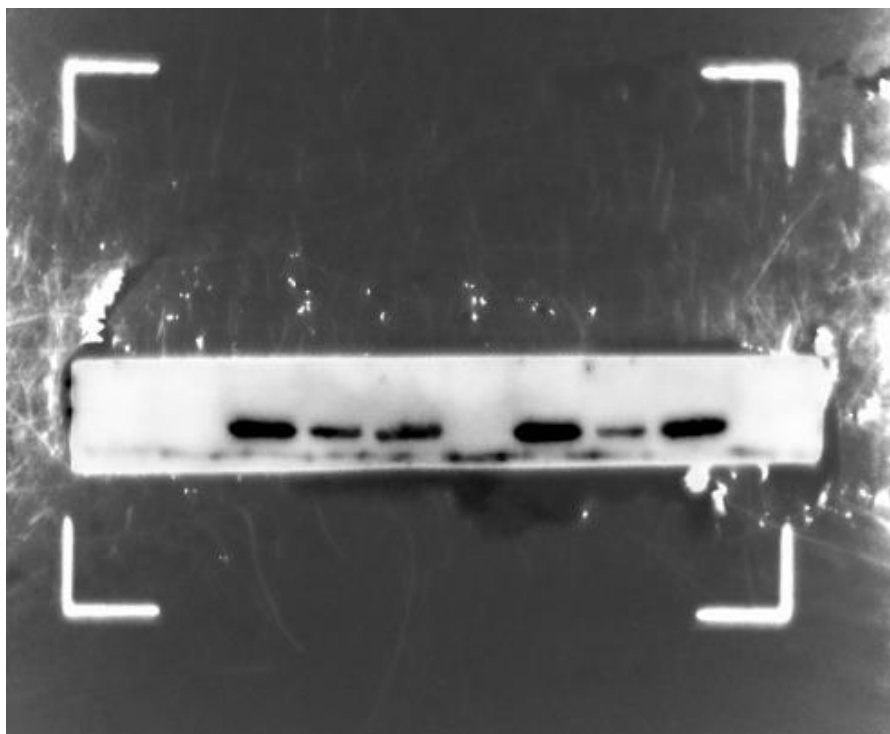

S5G

BAX

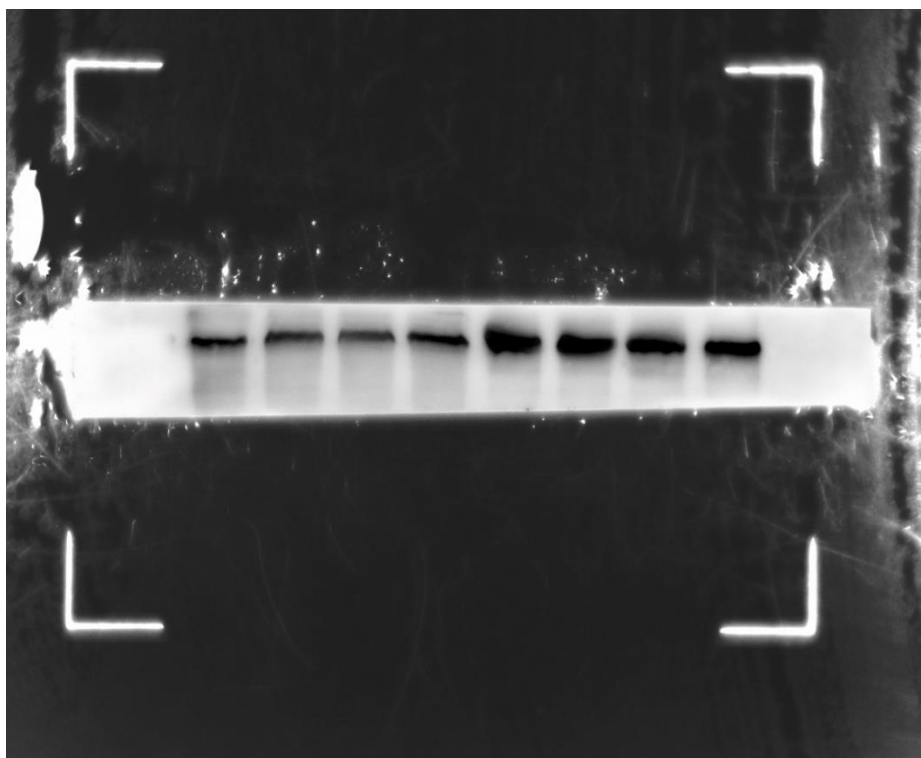

**GAPDH**

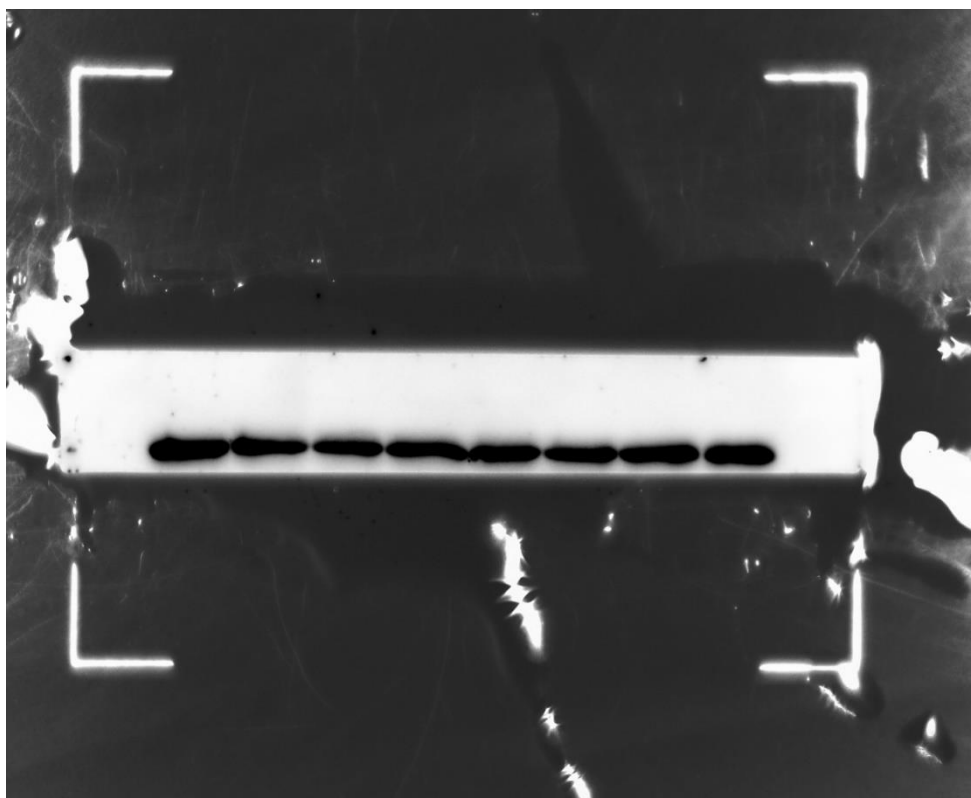

**PARKIN**

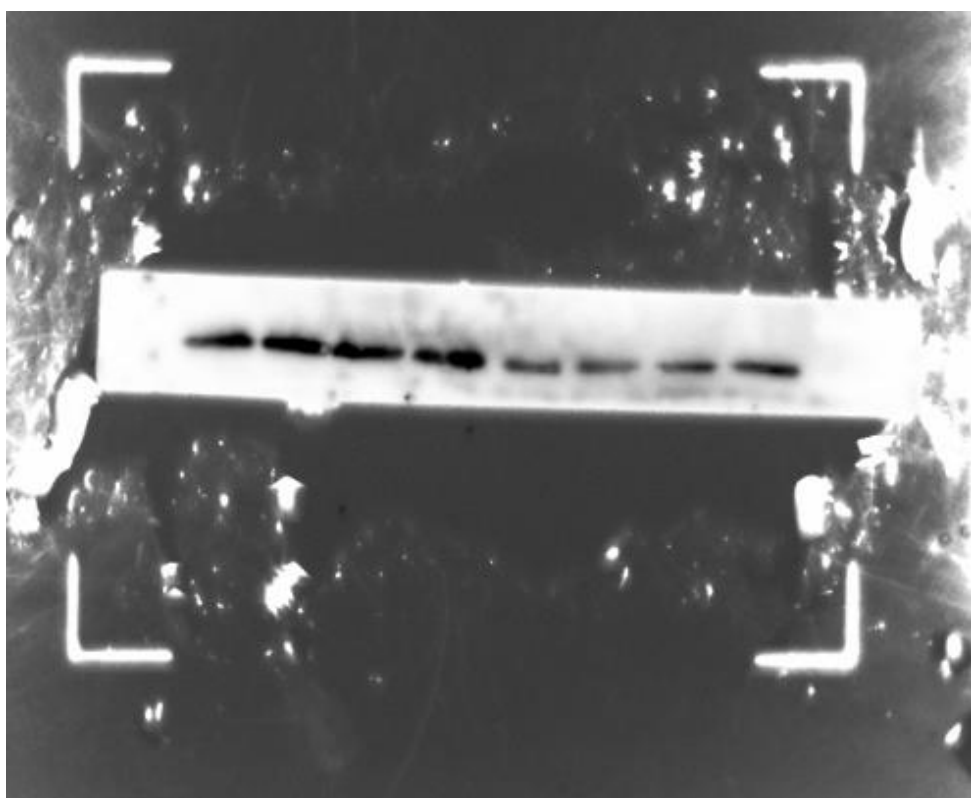

**S6A LEFT**

**GAPDH**

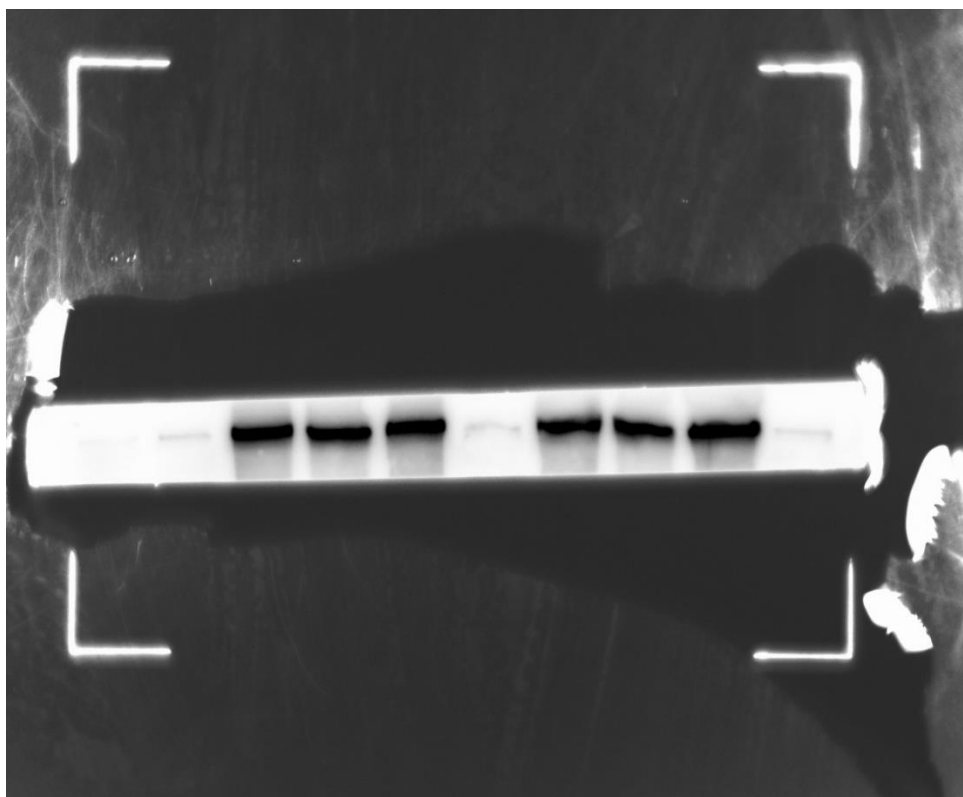

**TET1**

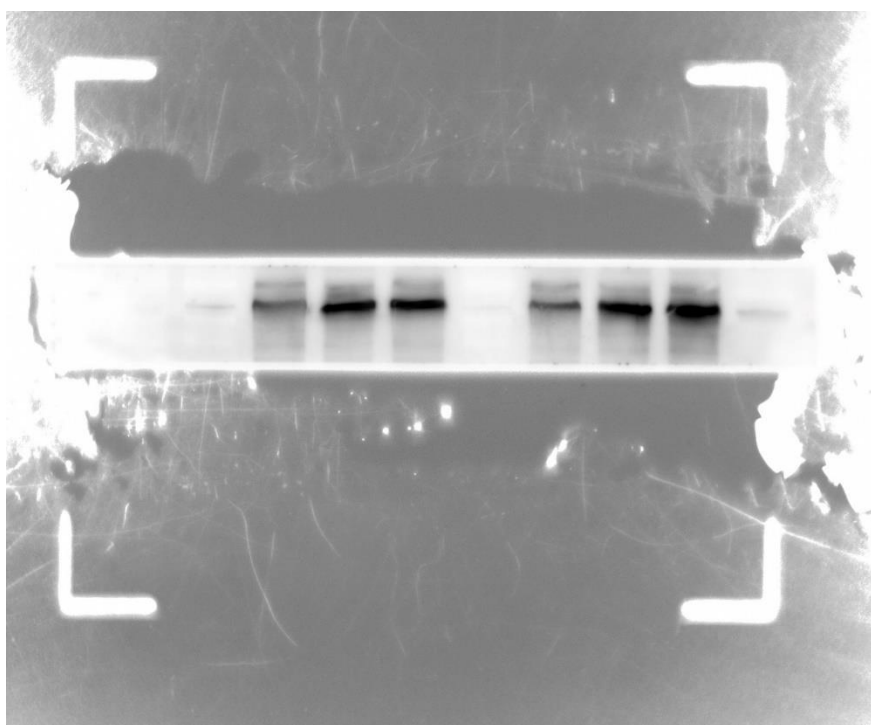



**CRABP2**

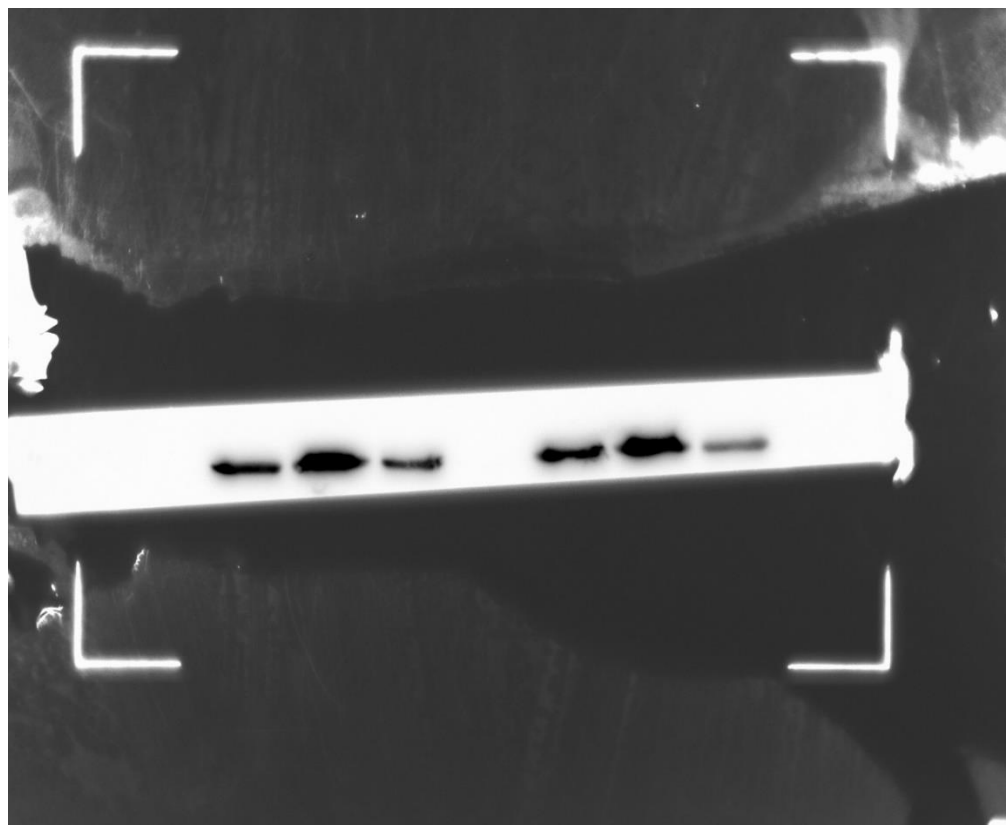

**BAX**

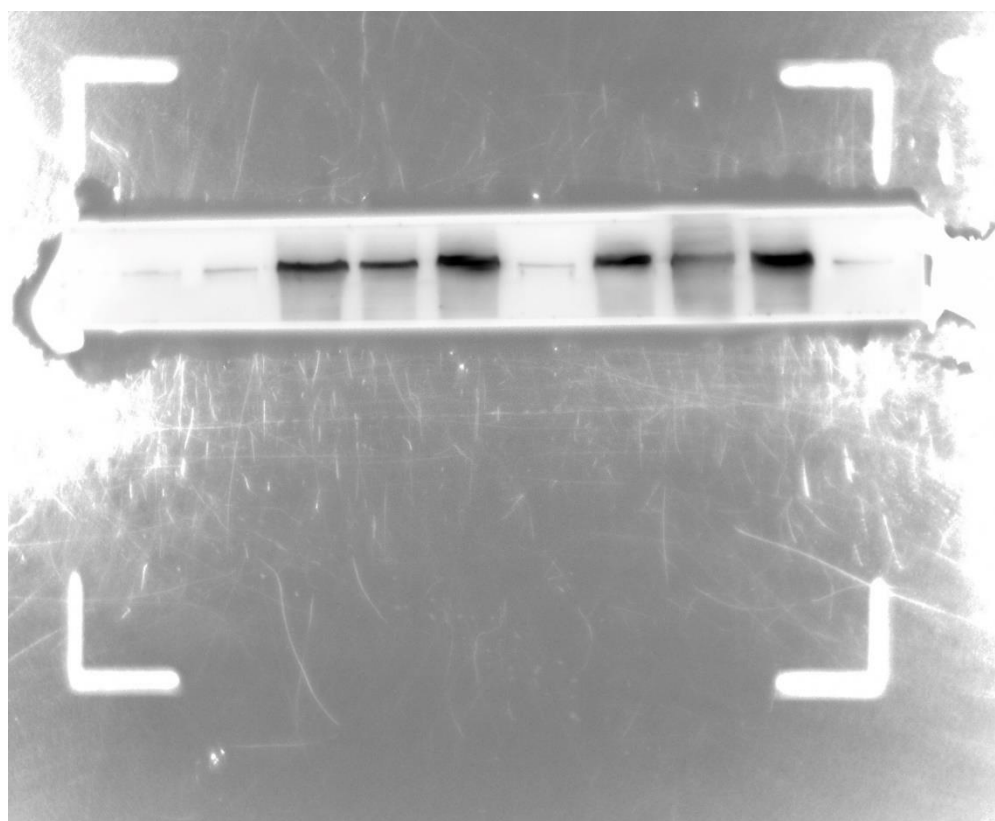



**CAPASE3**

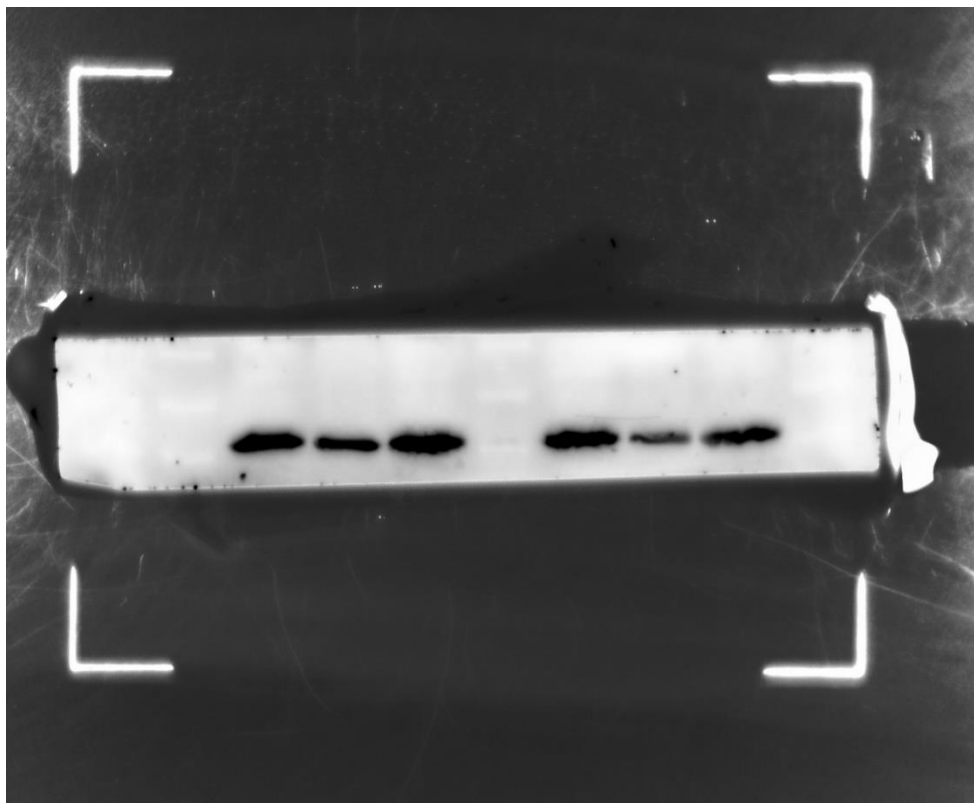

**S6A RIGHT**

**GAPDH**

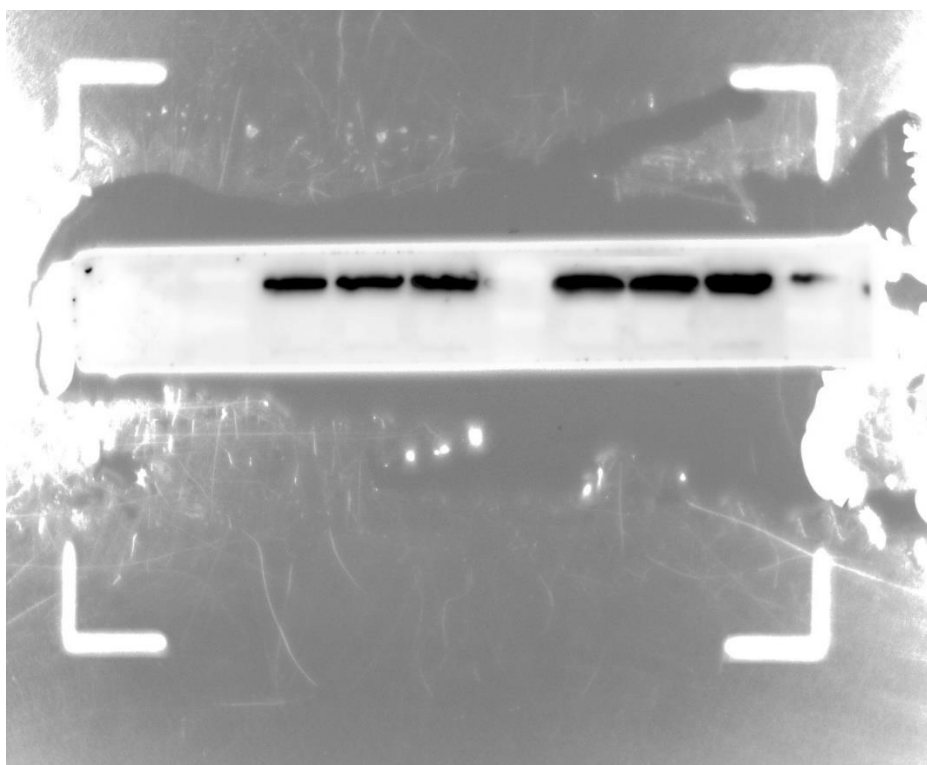

**TET1**

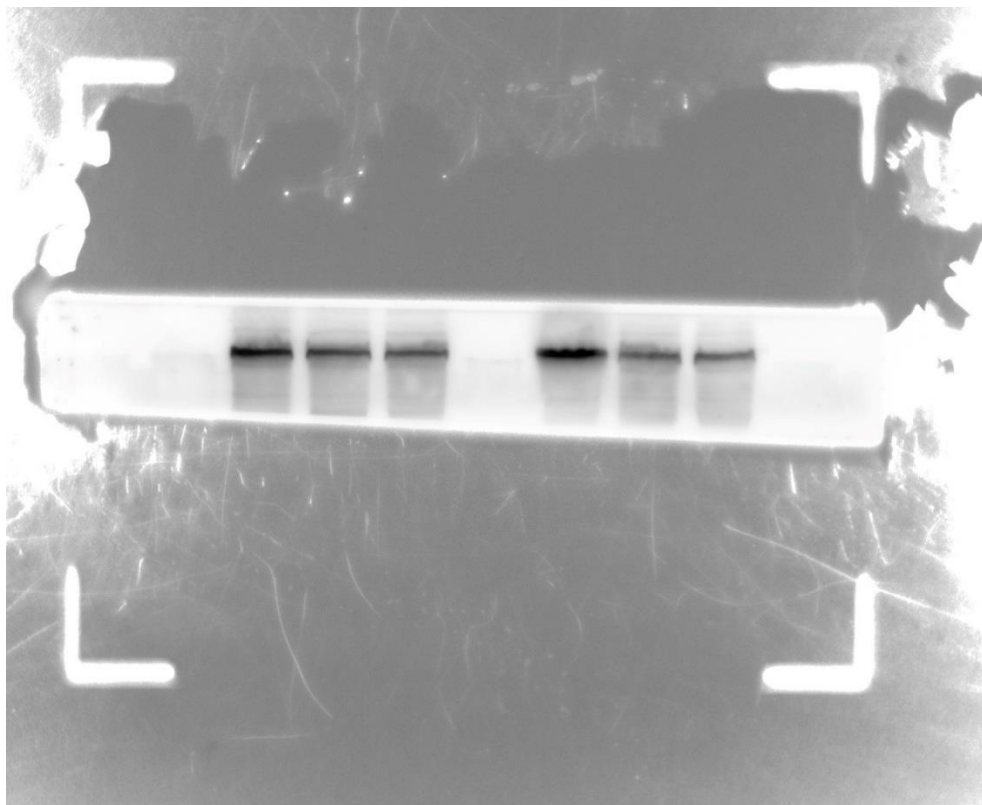

**BAX**

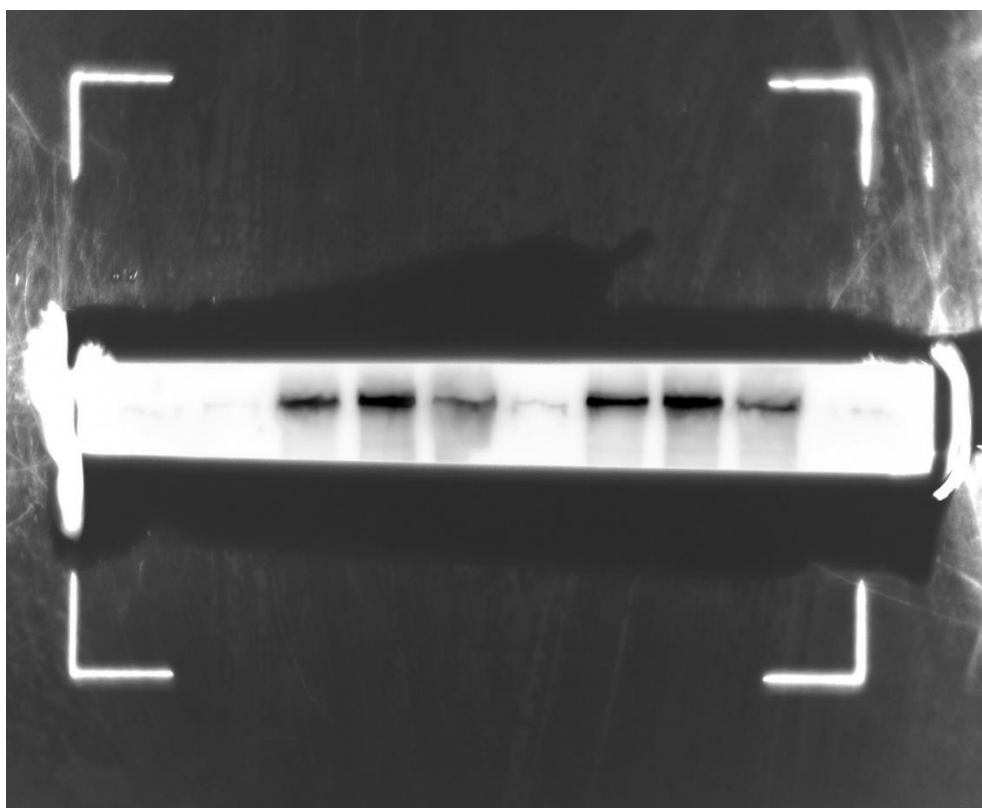

## CRABP2

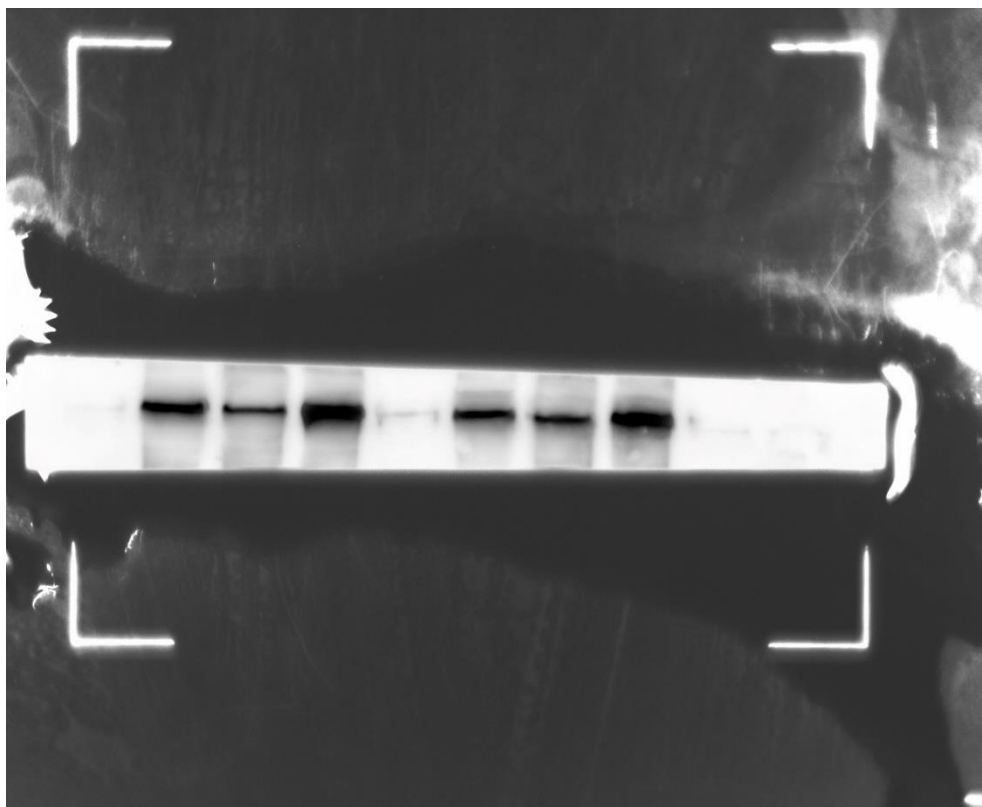

## CASEPASE3

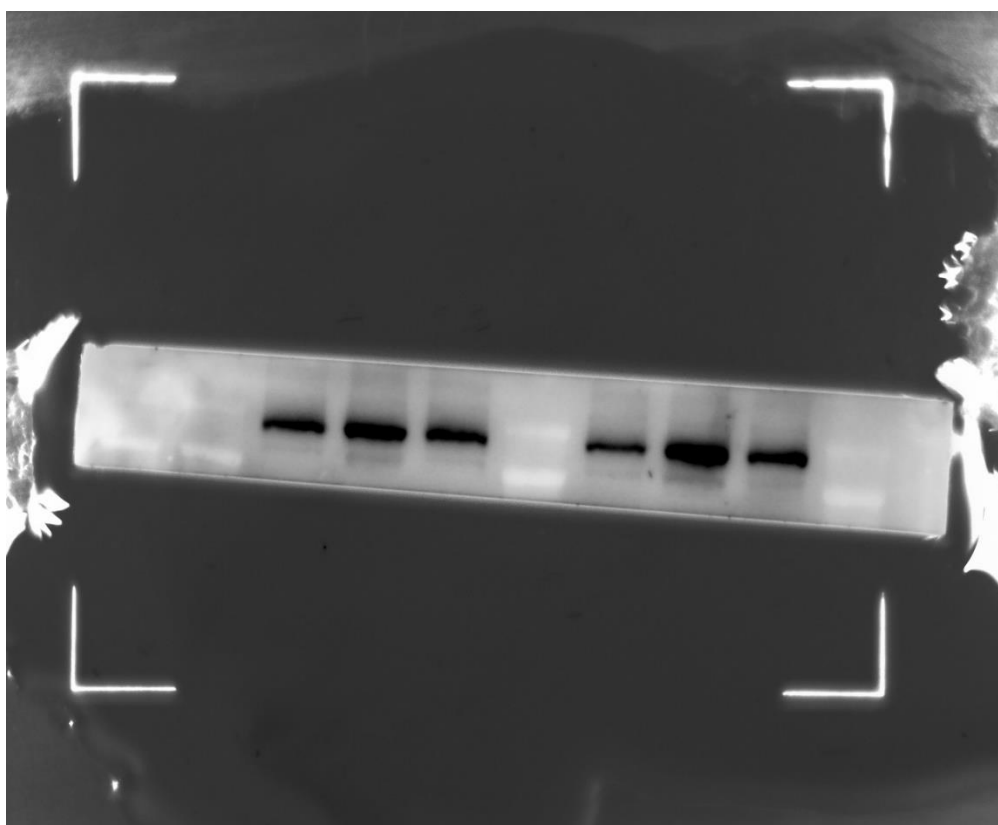

S6H UP  
GAPDH

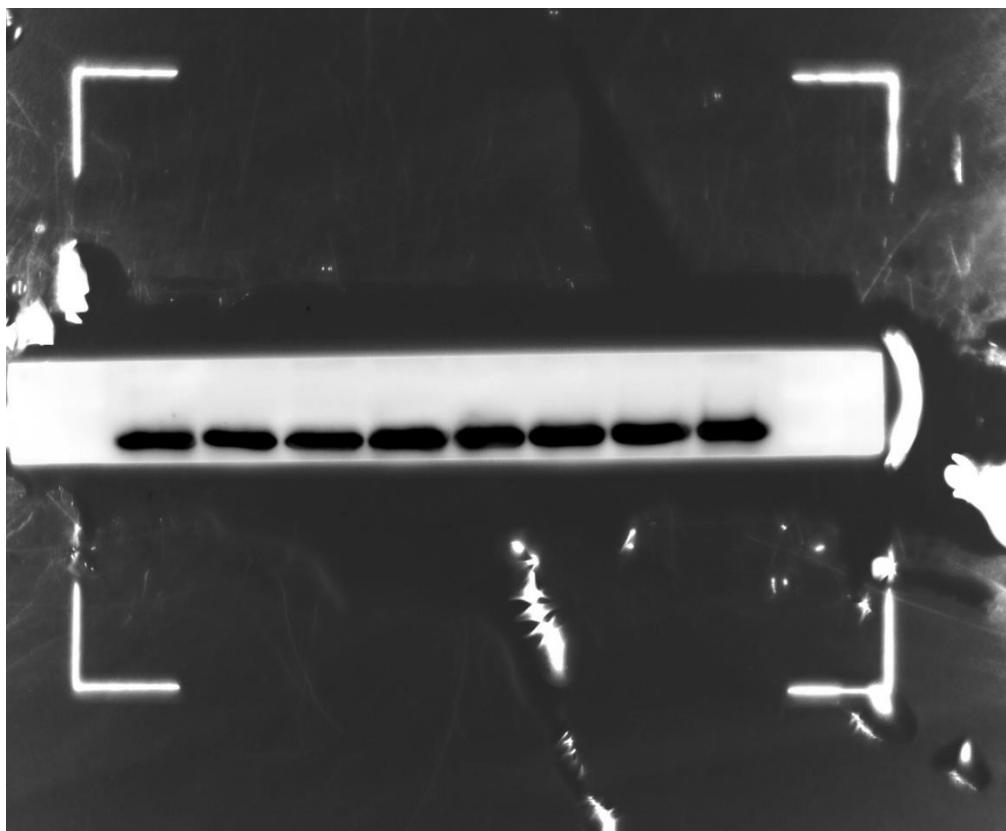

TET1

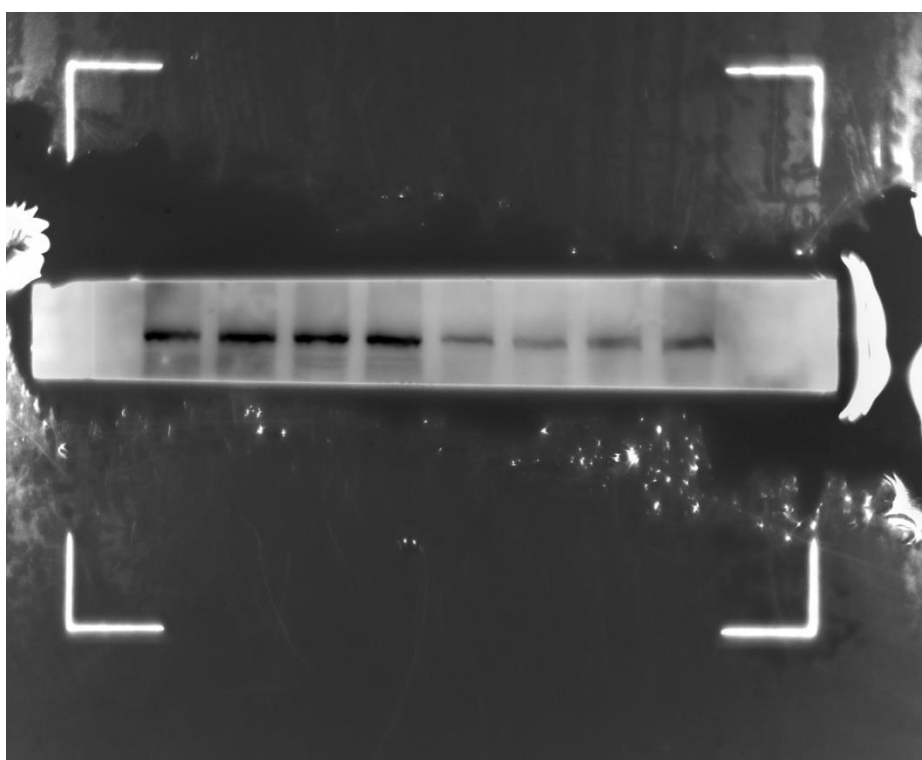

**CRABP2**

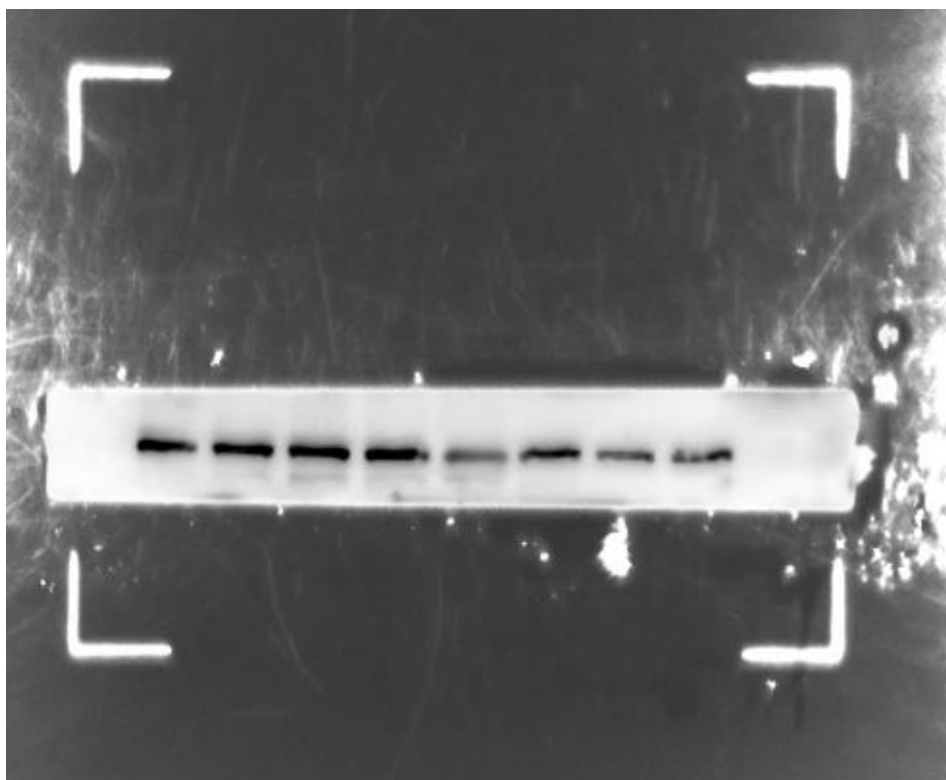

**BAX**

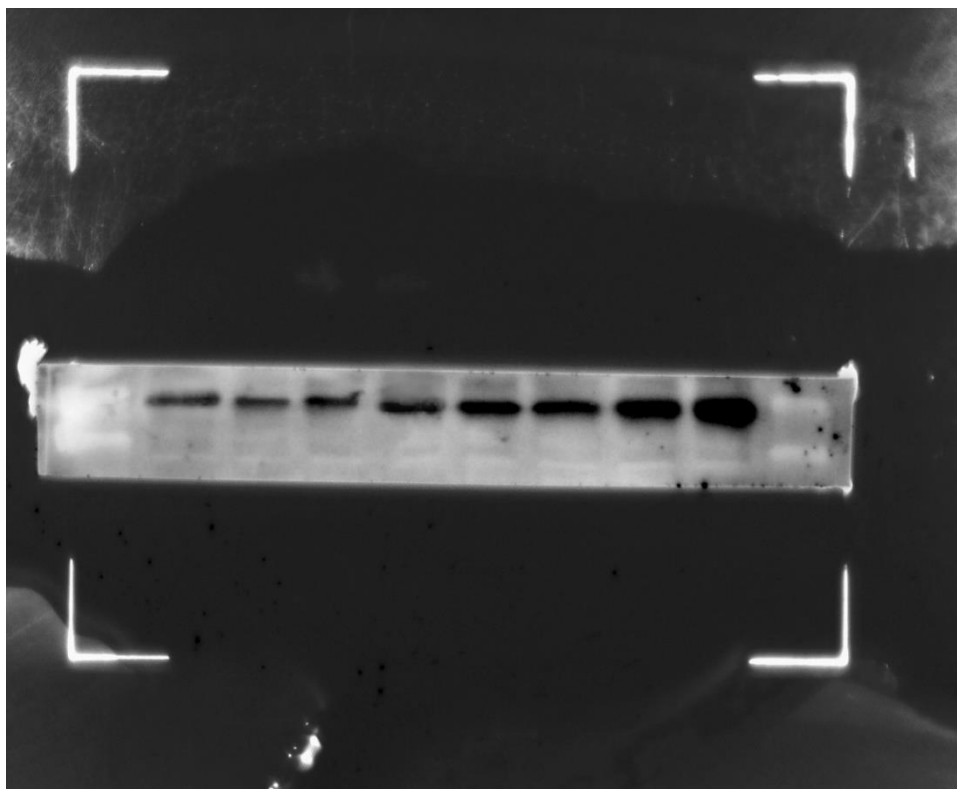

**S6H DOWN**

**GAPDH**

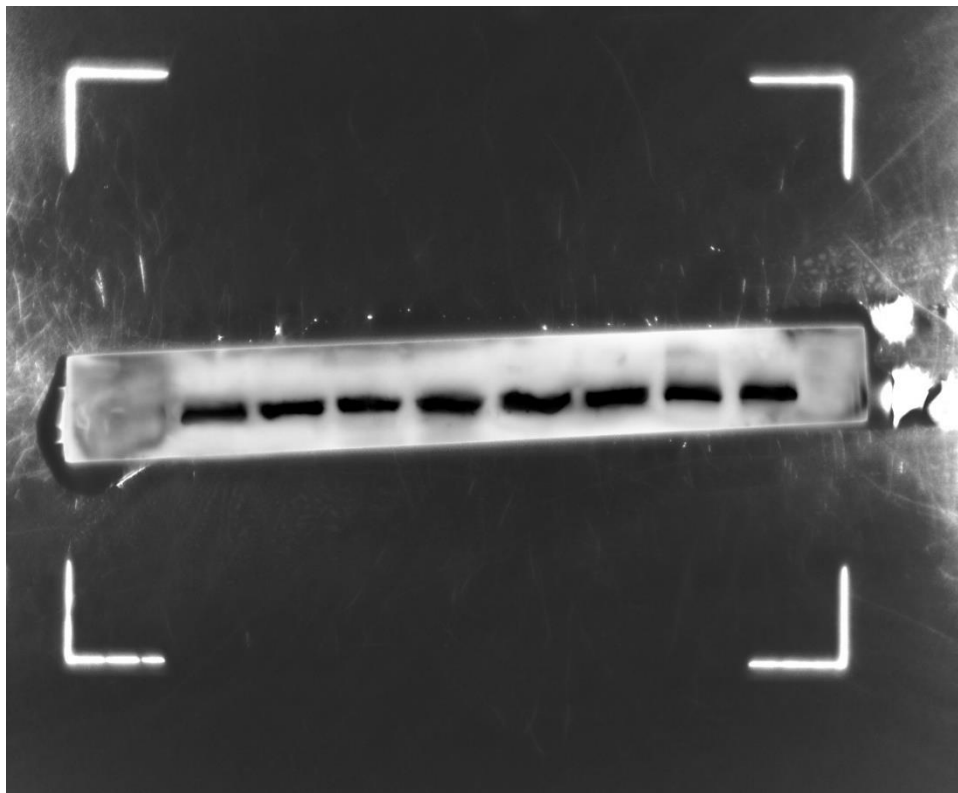

**TET1**

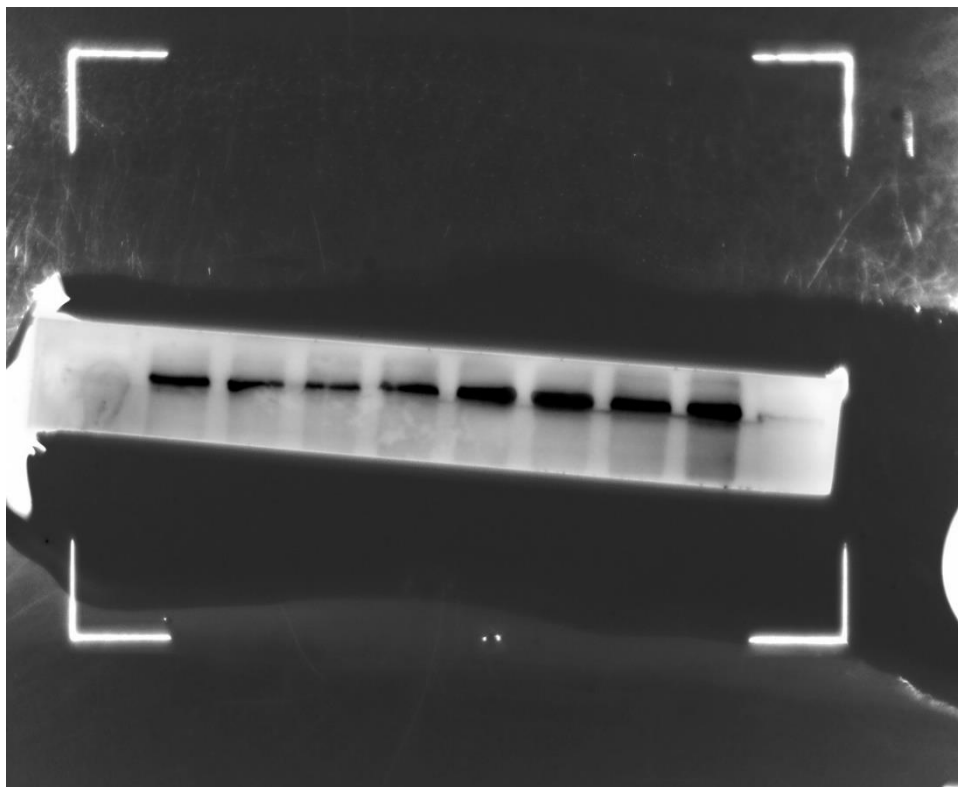

**CRABP2**

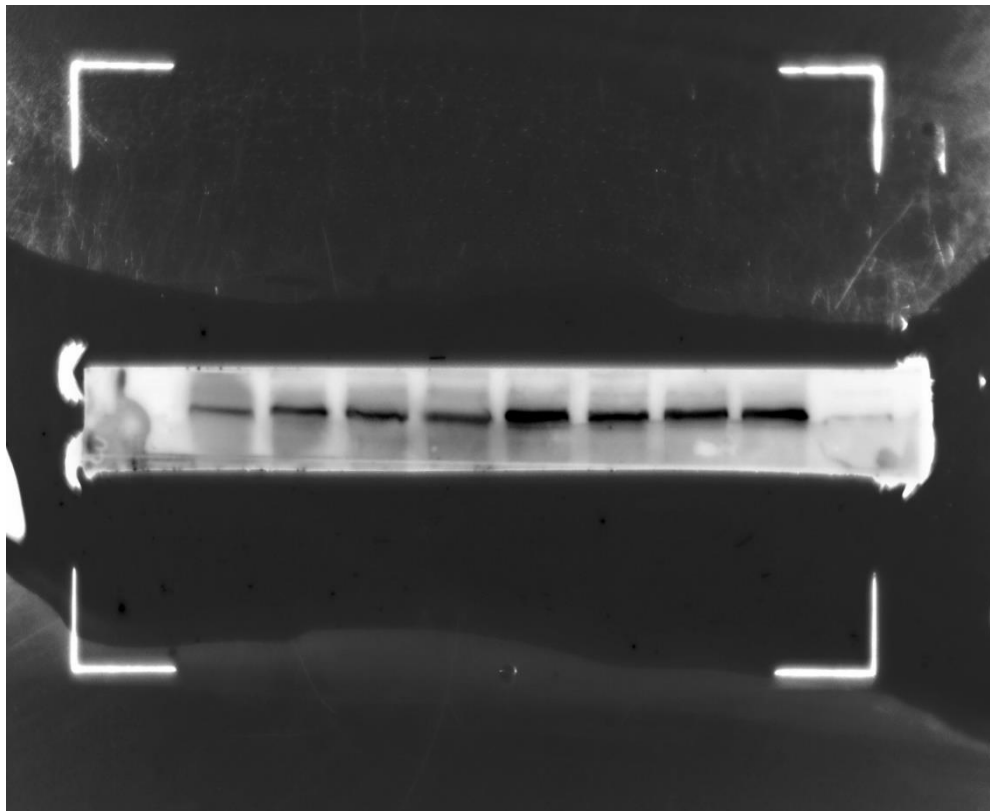

**BAX**

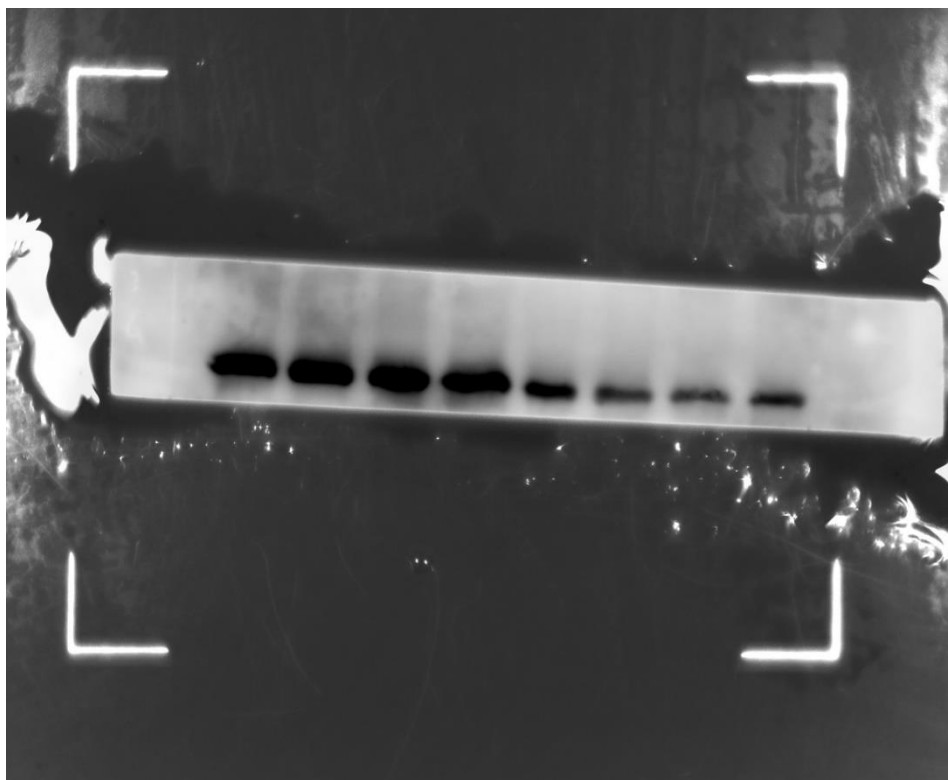

Supplement: 41419_2022_5299_MOESM13_ESM.pdf [file 41419_2022_5299_MOESM13_ESM.pdf]
