# Supplementary material for: Upregulation of CRABP2 by TET1-mediated DNA hydroxymethylation attenuates mitochondrial apoptosis and promotes oxaliplatin resistance in gastric cancer
Source: PubMed Central journal article supplement (PMC9532395; doi:10.1038/s41419-022-05299-2), 2022-10-04
Supplement: 41419_2022_5299_MOESM15_ESM.pdf [file 41419_2022_5299_MOESM15_ESM.pdf]

This document certifies that the manuscript

## **Upregulation of CRABP2 by TET1-mediated DNA hydroxymethylation attenuates mitochondrial apoptosis and promotes oxaliplatin resistance in gastric cancer**

prepared by the authors

**Hui Qu**

was edited for proper English language, grammar, punctuation, spelling, and overall style by one or more of the highly qualified native English speaking editors at AJE.

This certificate was issued on **July 14, 2022** and may be verified on the [AJE website](#) using the verification code **F9DB-F2B4-05BE-3EF0-A93P**.

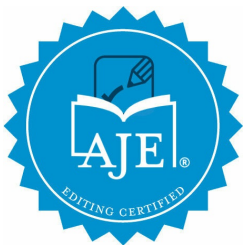

Neither the research content nor the authors' intentions were altered in any way during the editing process. Documents receiving this certification should be English-ready for publication; however, the author has the ability to accept or reject our suggestions and changes. To verify the final AJE edited version, please visit our verification page at [aje.com/certificate](#). If you have any questions or concerns about this edited document, please contact AJE at [support@aje.com](mailto:support@aje.com).
